# Supplementary material for: Targeting Triple Negative Breast Cancer Stem Cells by Heat Shock Protein 70 Inhibitors
Source: MDPI journal article supplement (doi:10.3390/cancers14194898), 2022-10-07

# Original WB

**Targeting Triple Negative Breast Cancer Stem Cells by Heat  
Shock Protein 70 Inhibitors**

|       | MCF-10A | MCF-7 | T47D | MDA-MB-468 | MDA-MB-231 | HCC-1937 | HCC-1806 |
|-------|---------|-------|------|------------|------------|----------|----------|
| HSP70 |         |       |      |            |            |          |          |
| Actin |         |       |      |            |            |          |          |
| HuR   |         |       |      |            |            |          |          |
| HSP90 |         |       |      |            |            |          |          |
| Actin |         |       |      |            |            |          |          |
| HuR   |         |       |      |            |            |          |          |

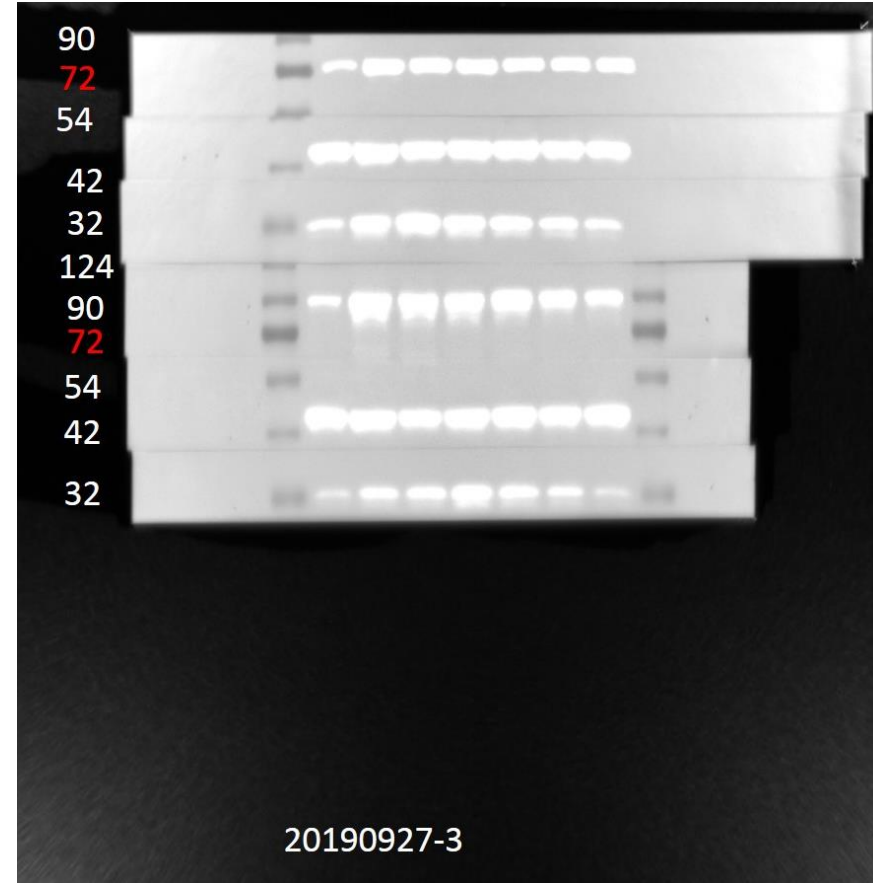

Fig. 3C

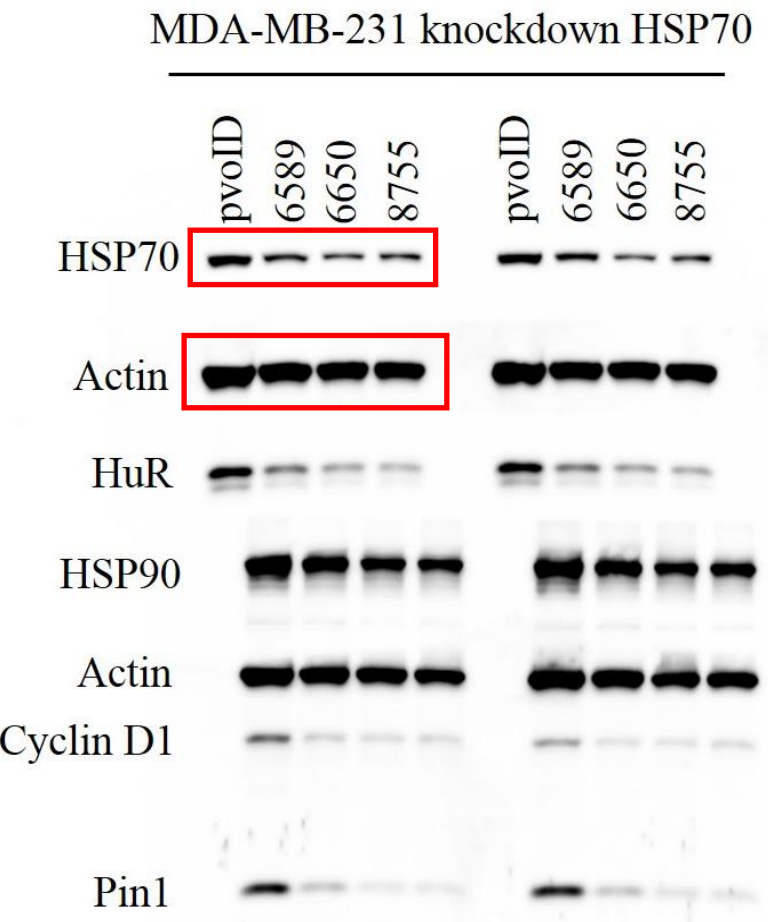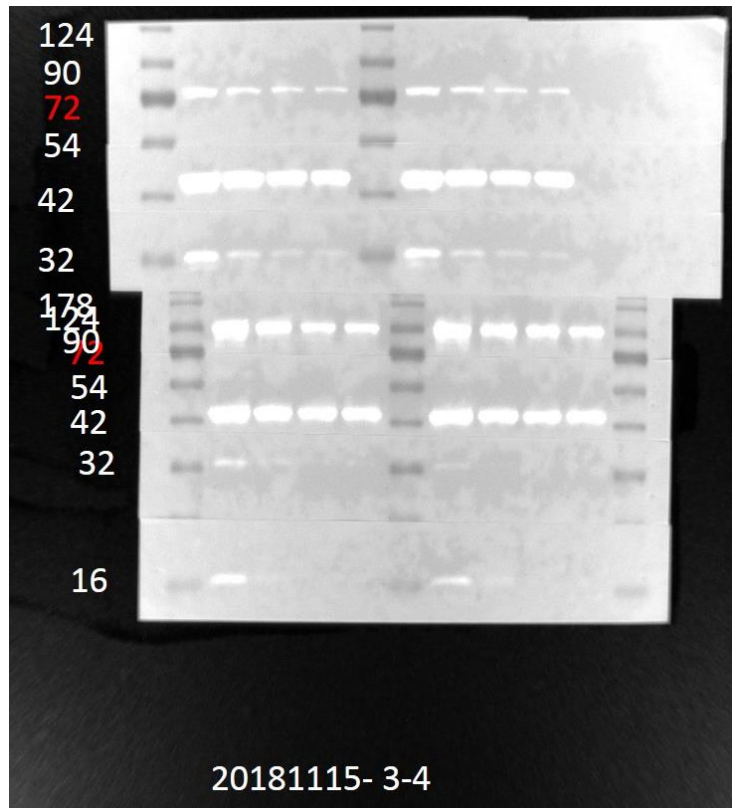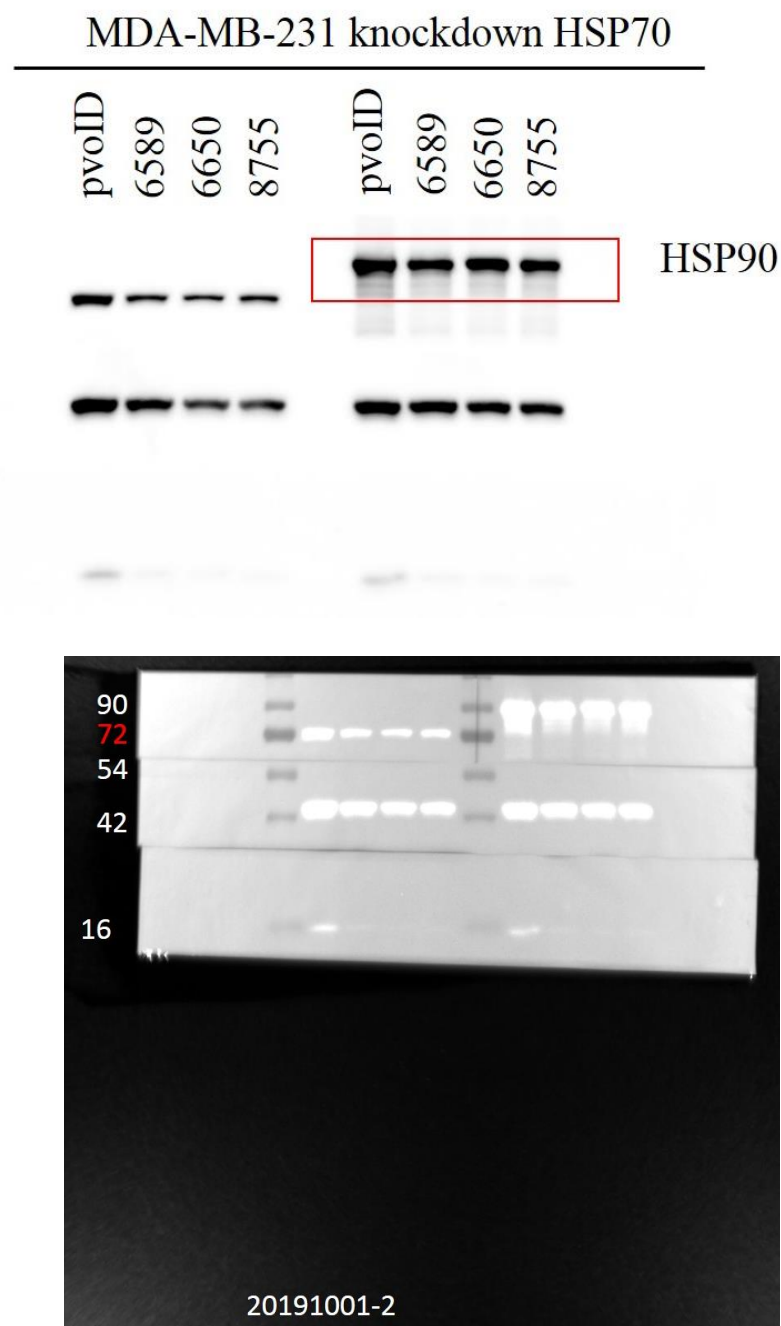

Fig. 4E (left)

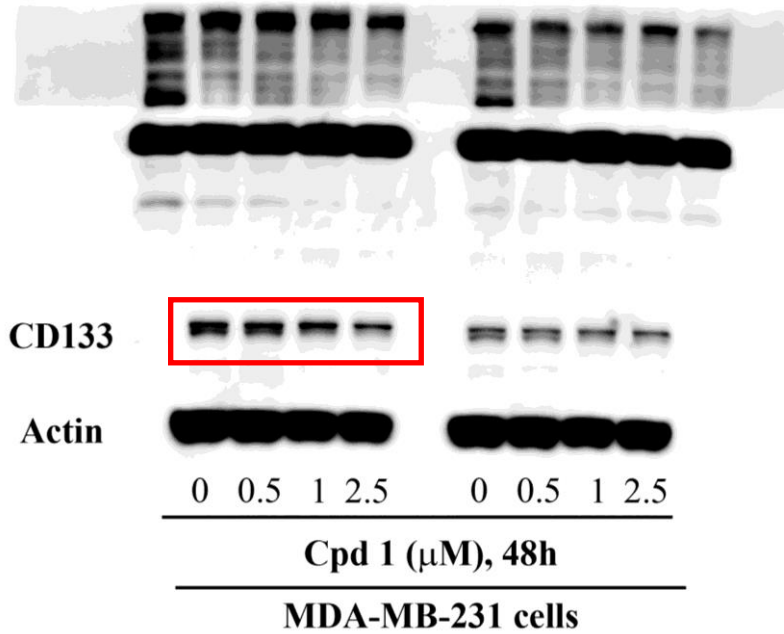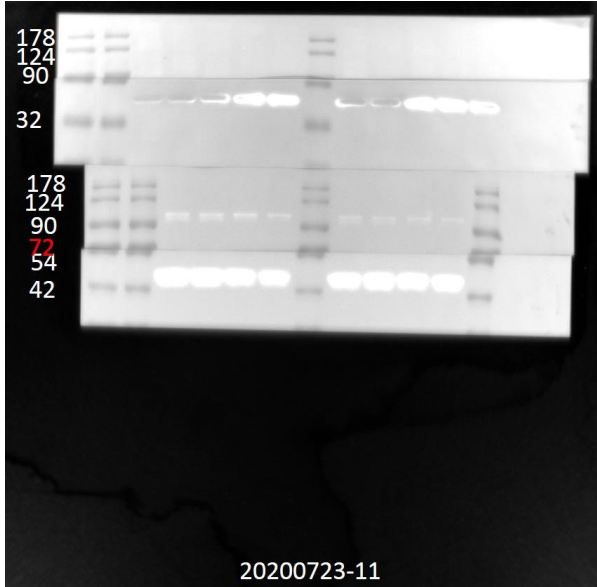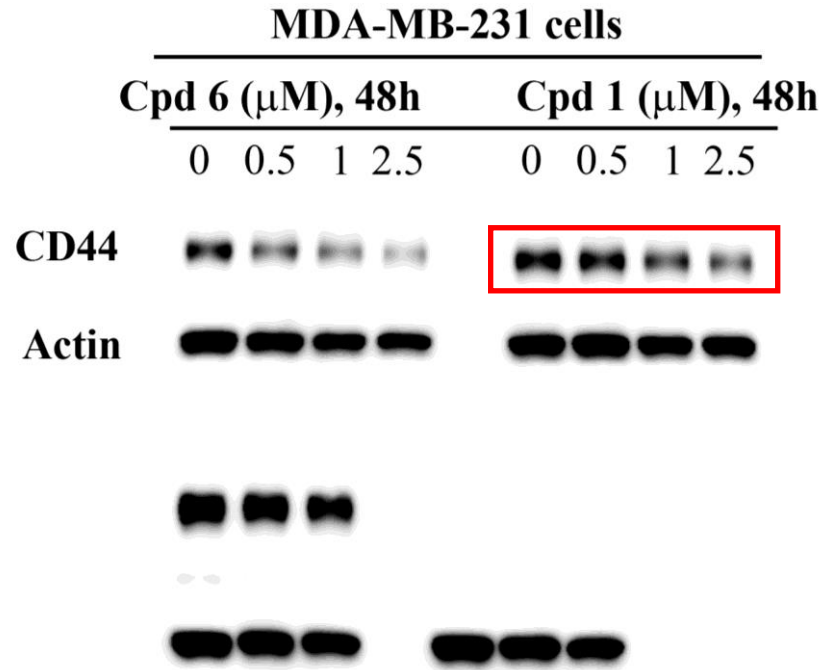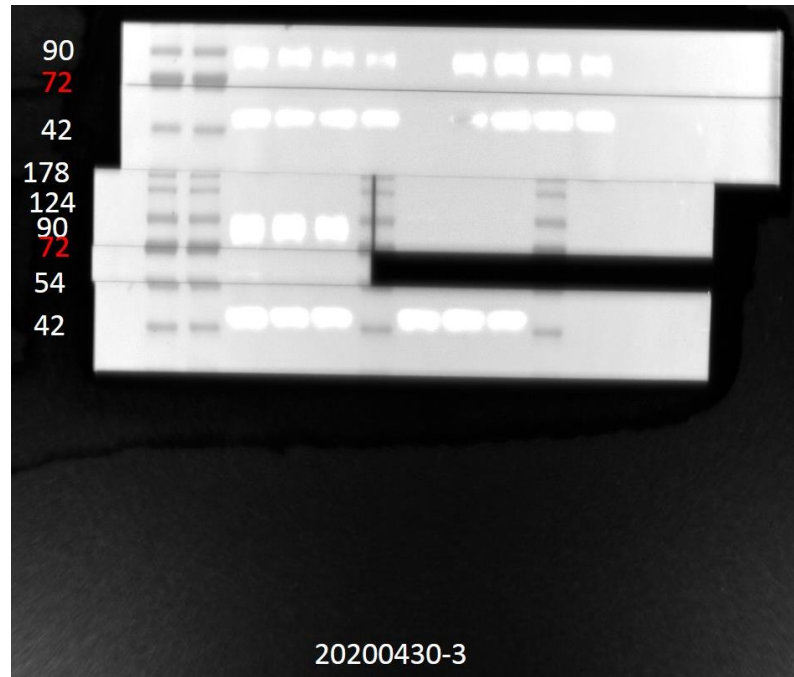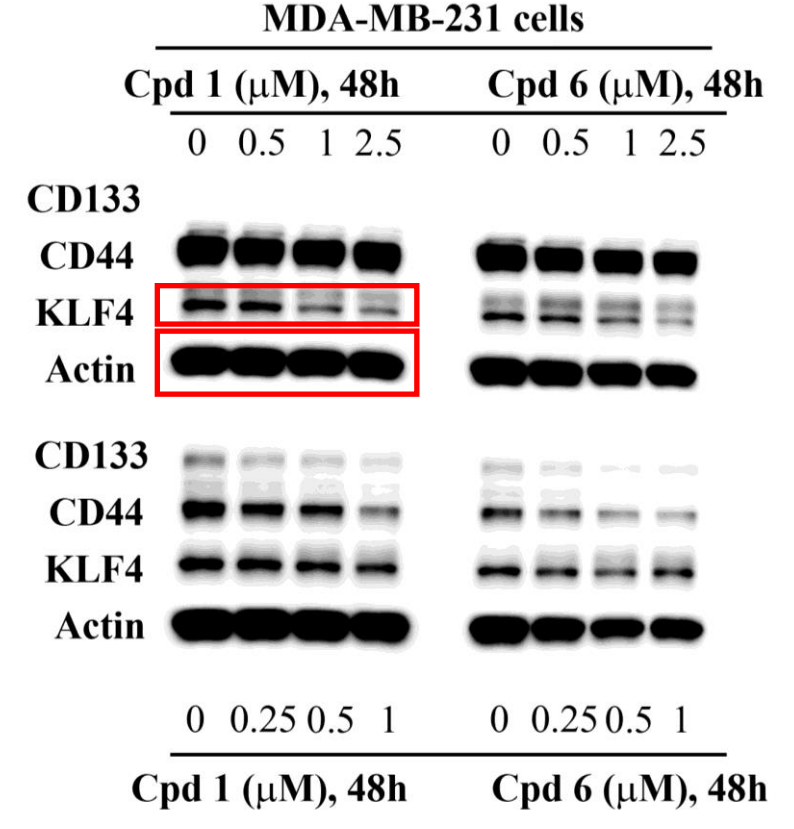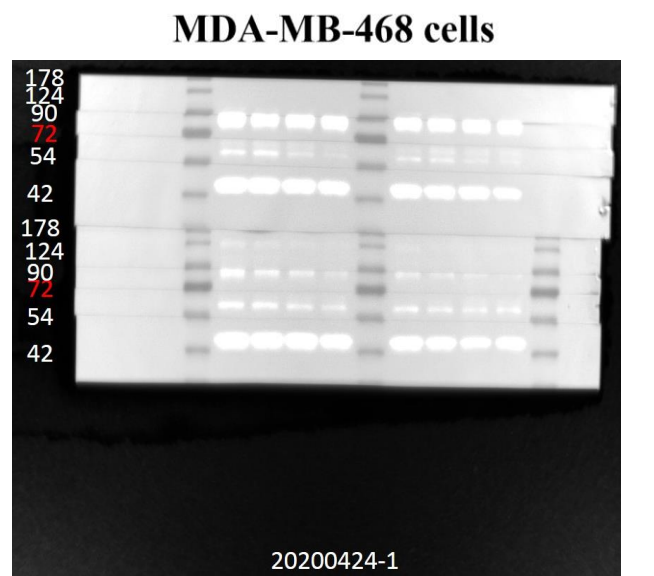

**Fig. 4E (left)**

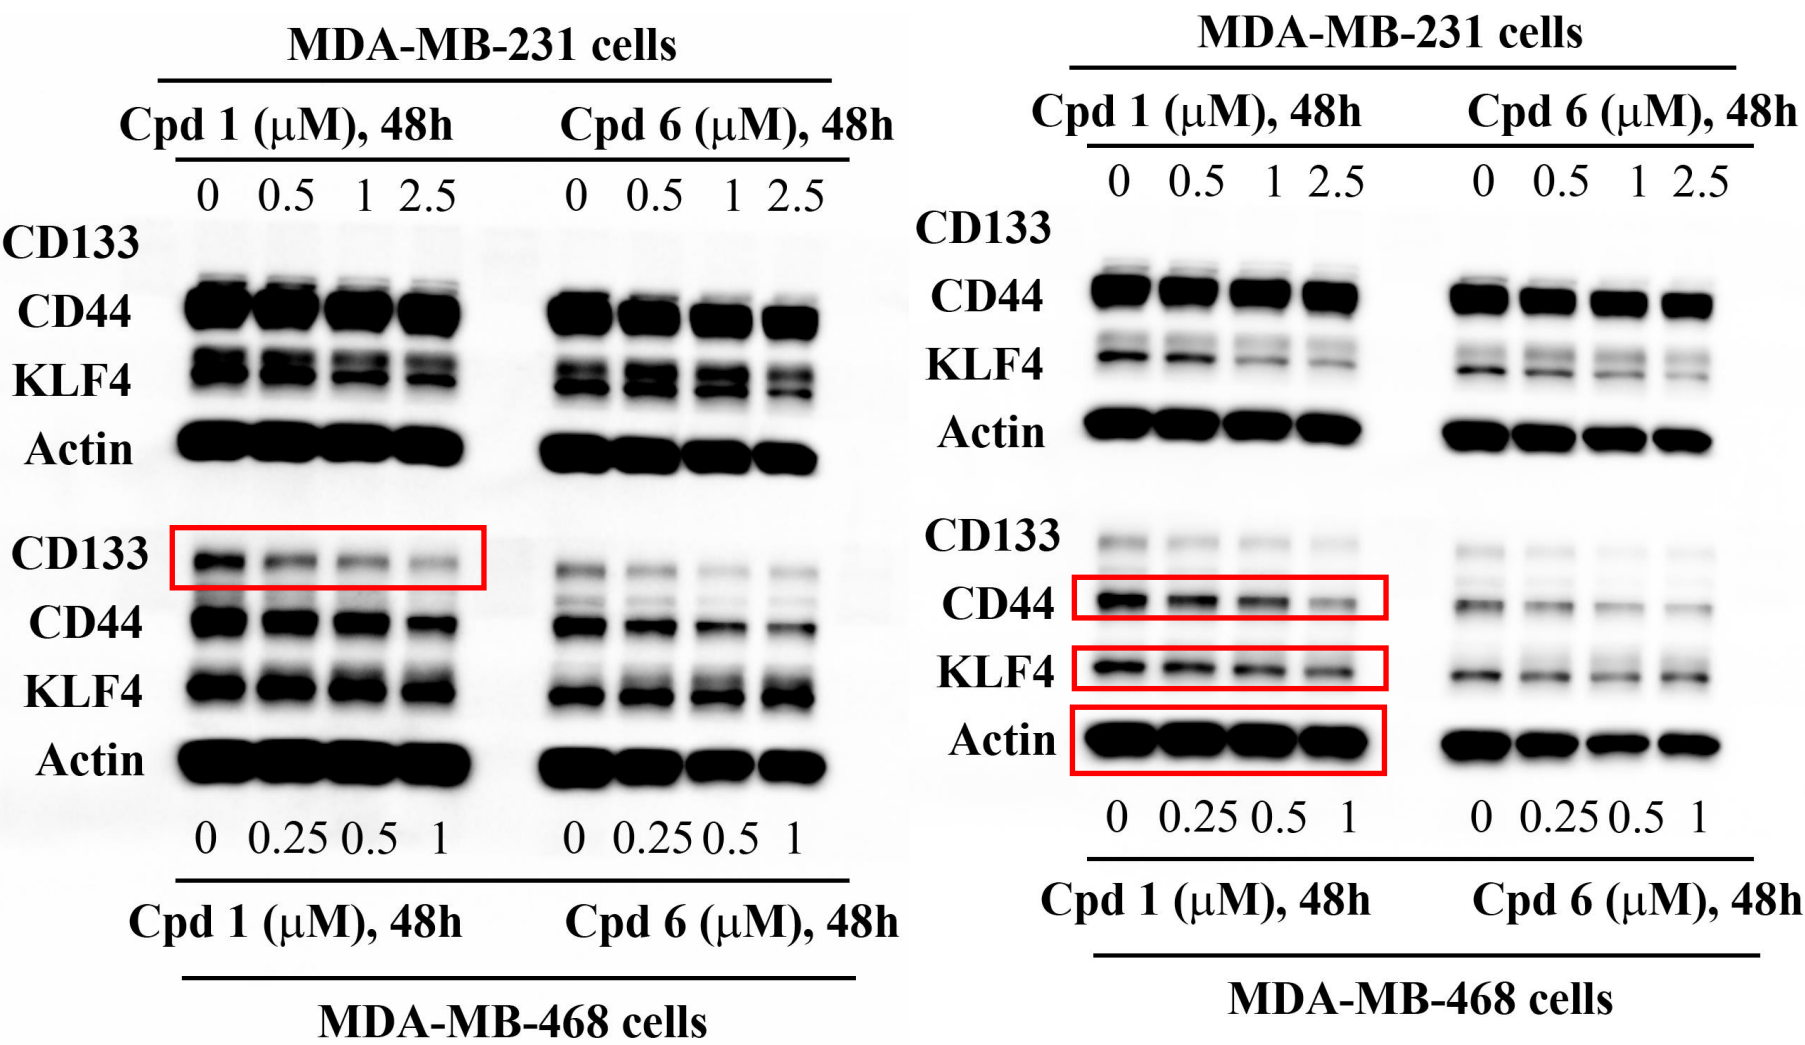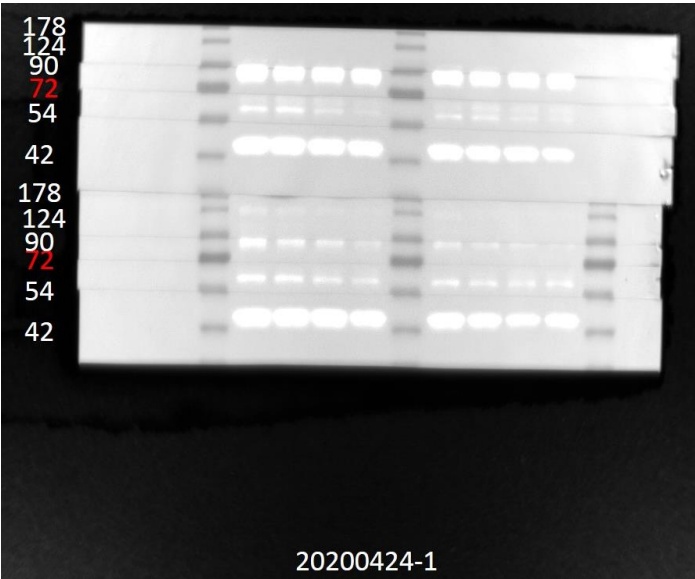



Fig. 4E (right)

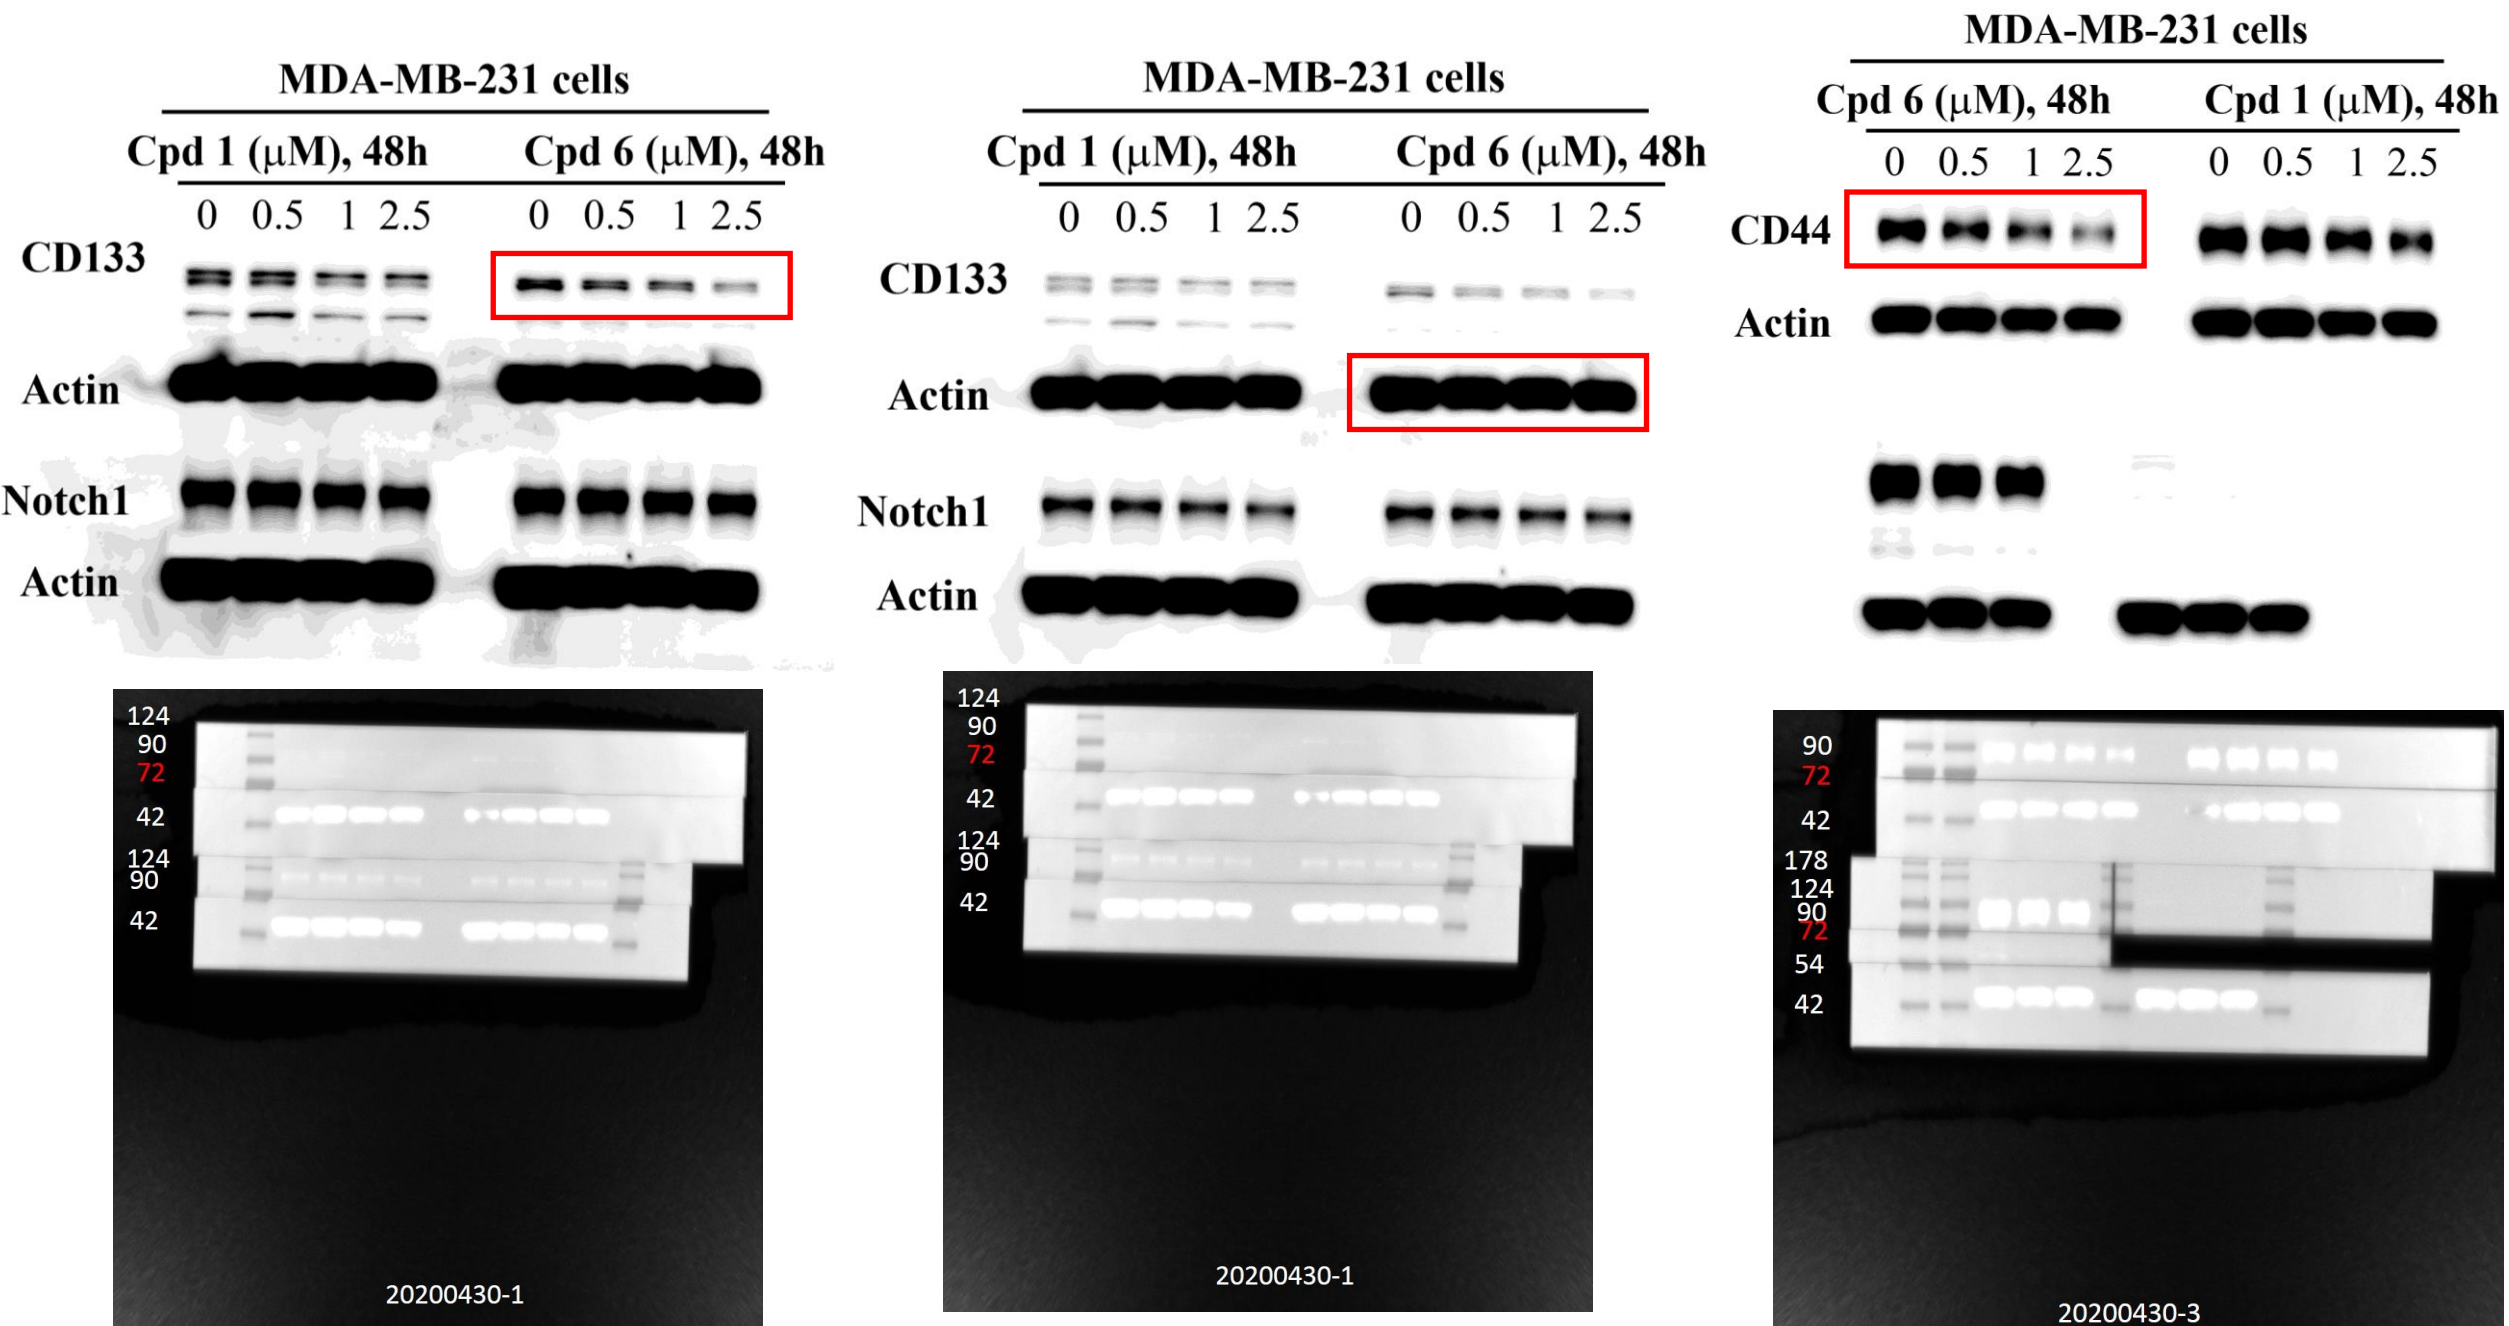

Fig. 4E (right)

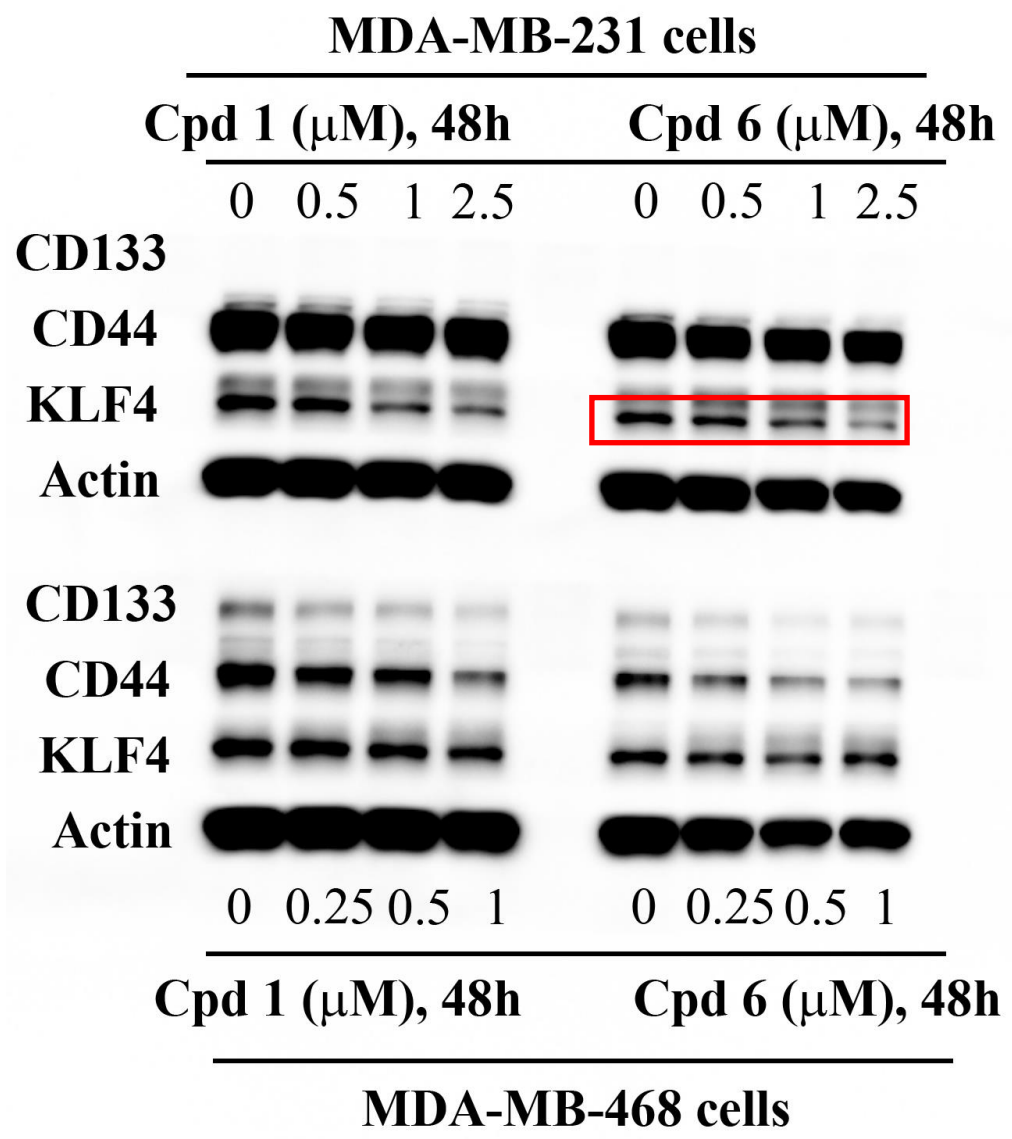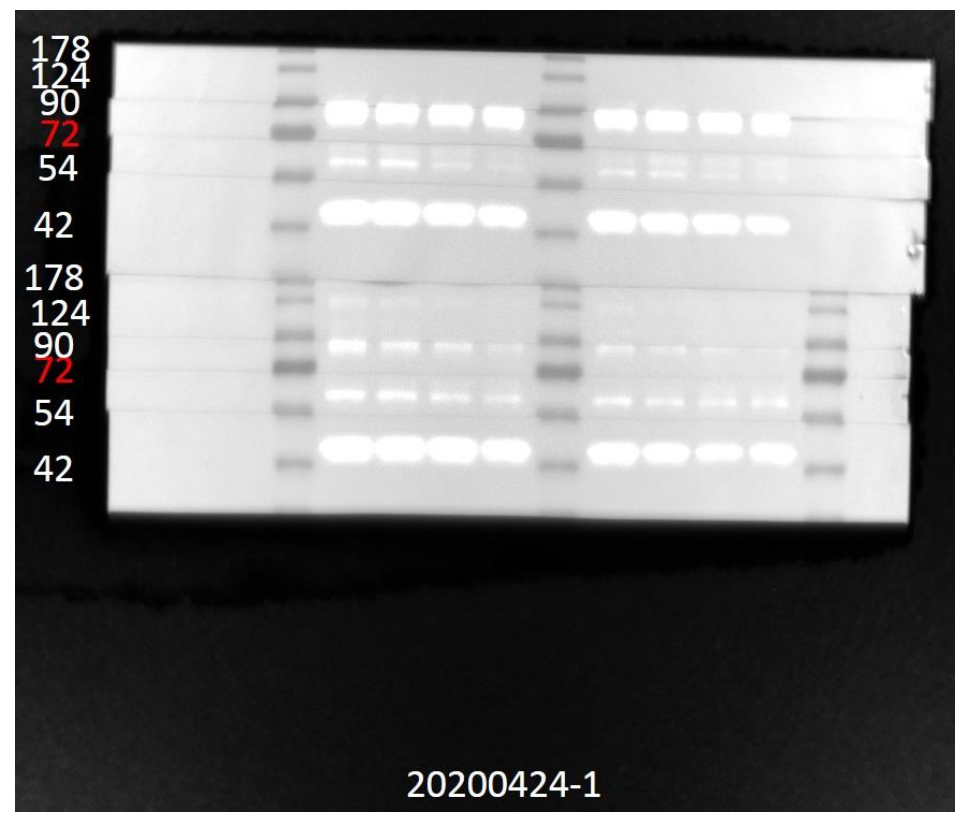

Fig. 4E (right)

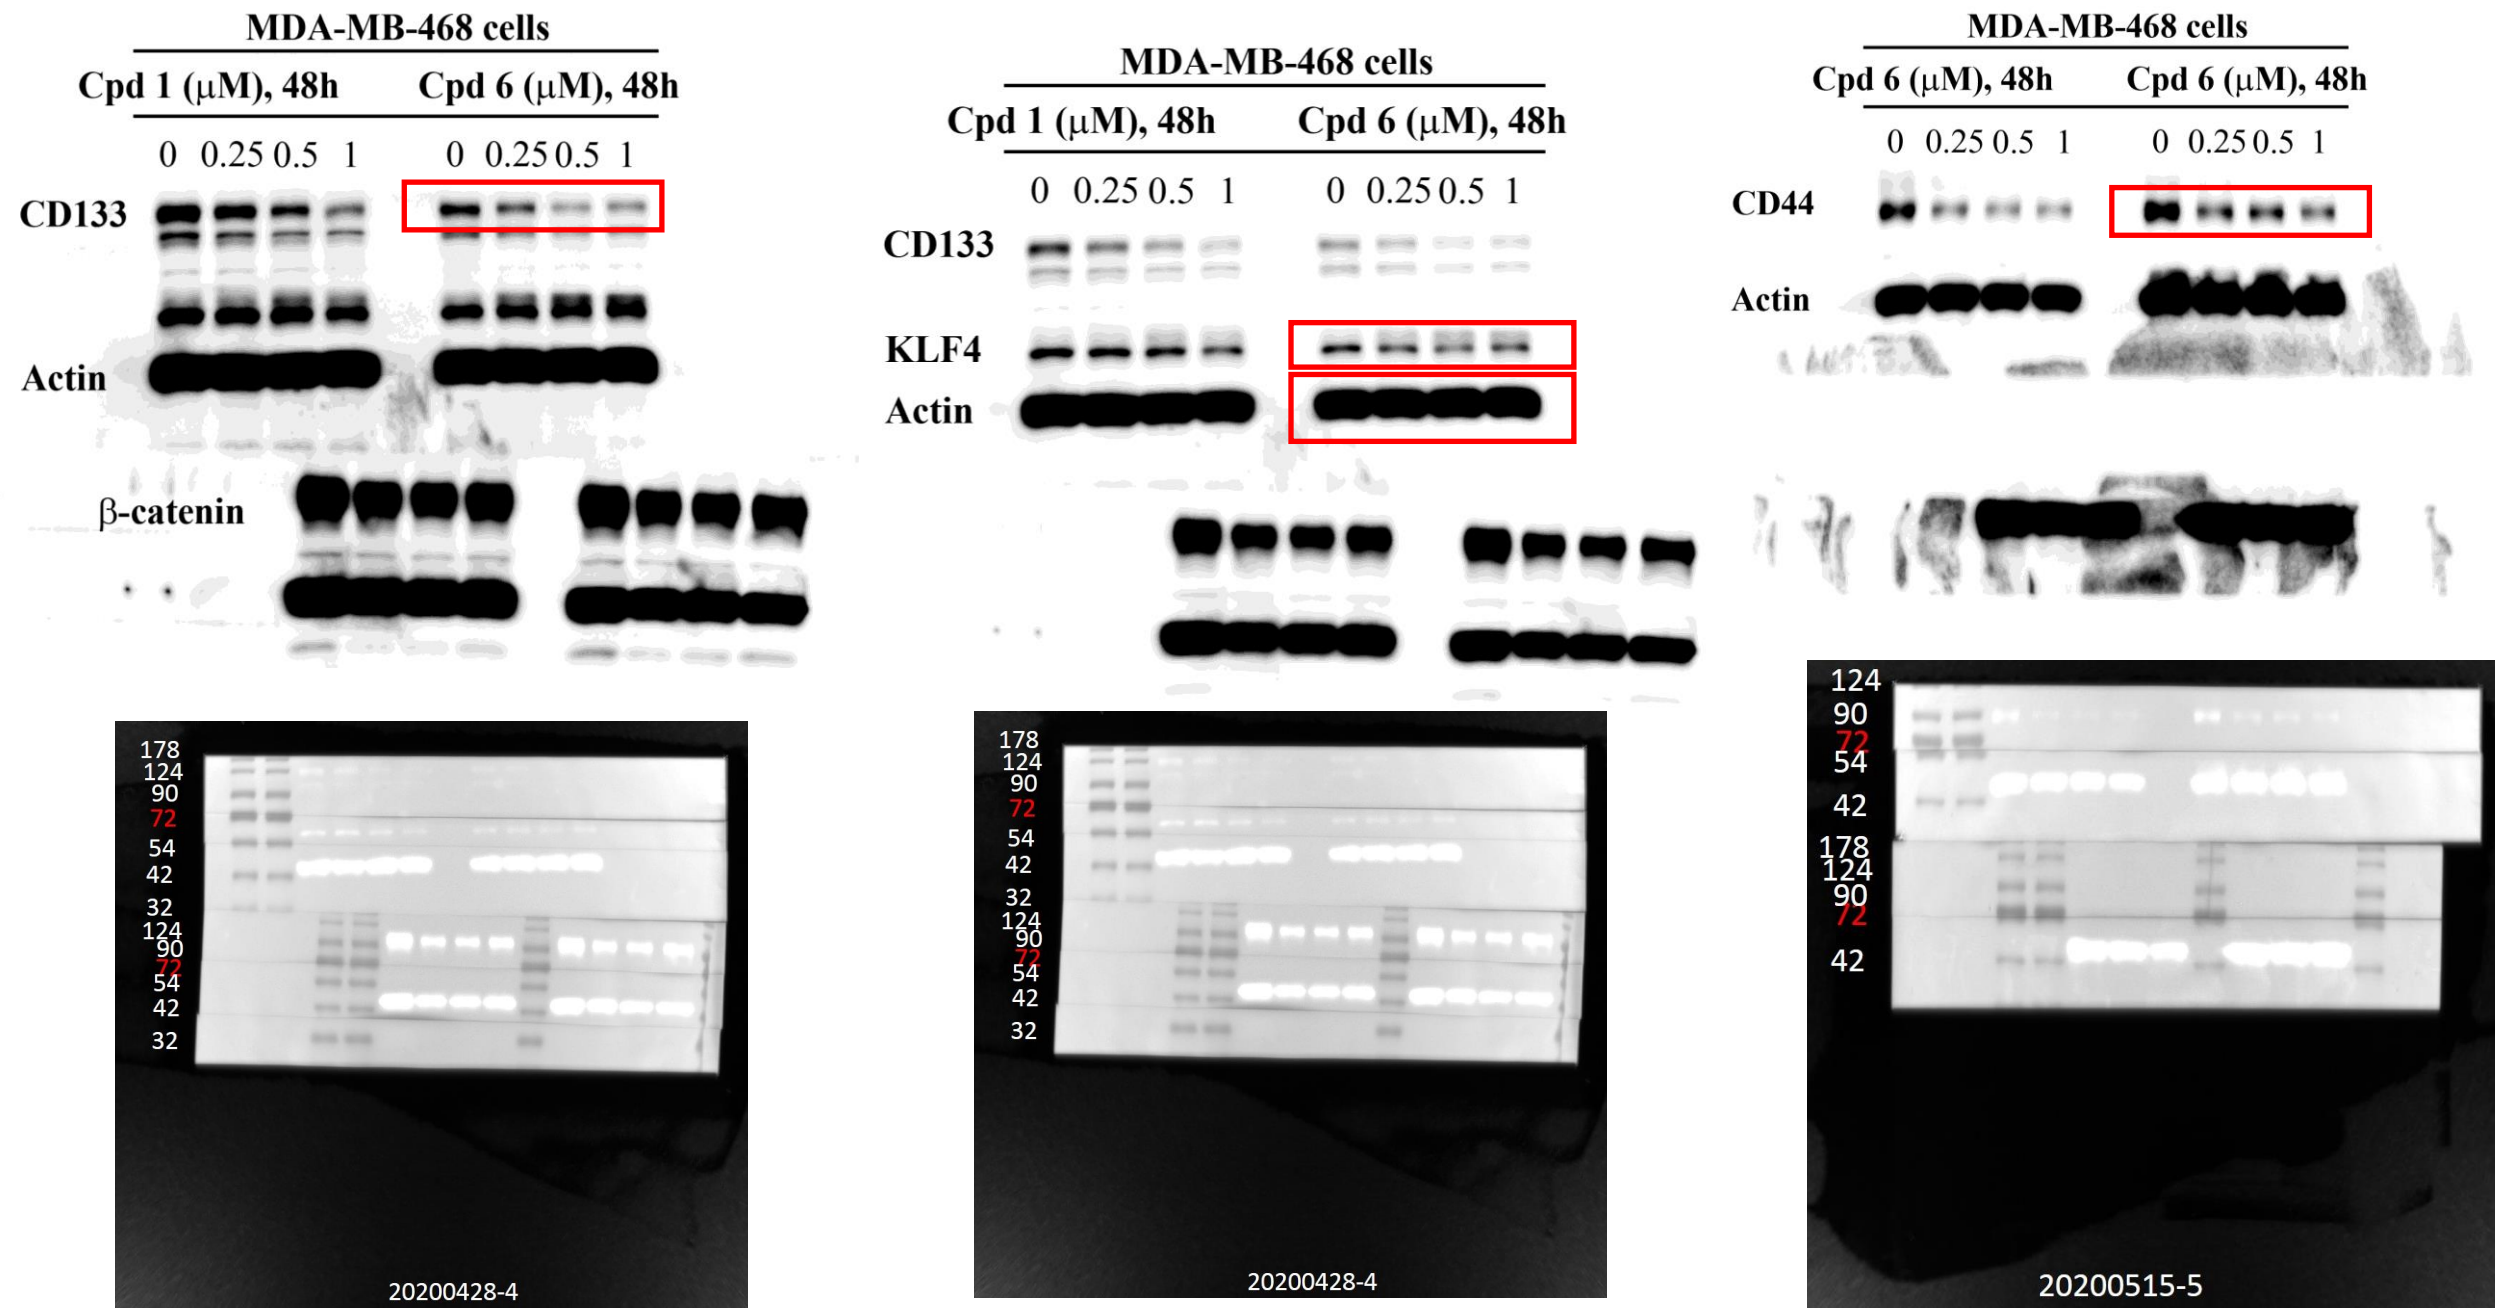



**Fig. 4F**

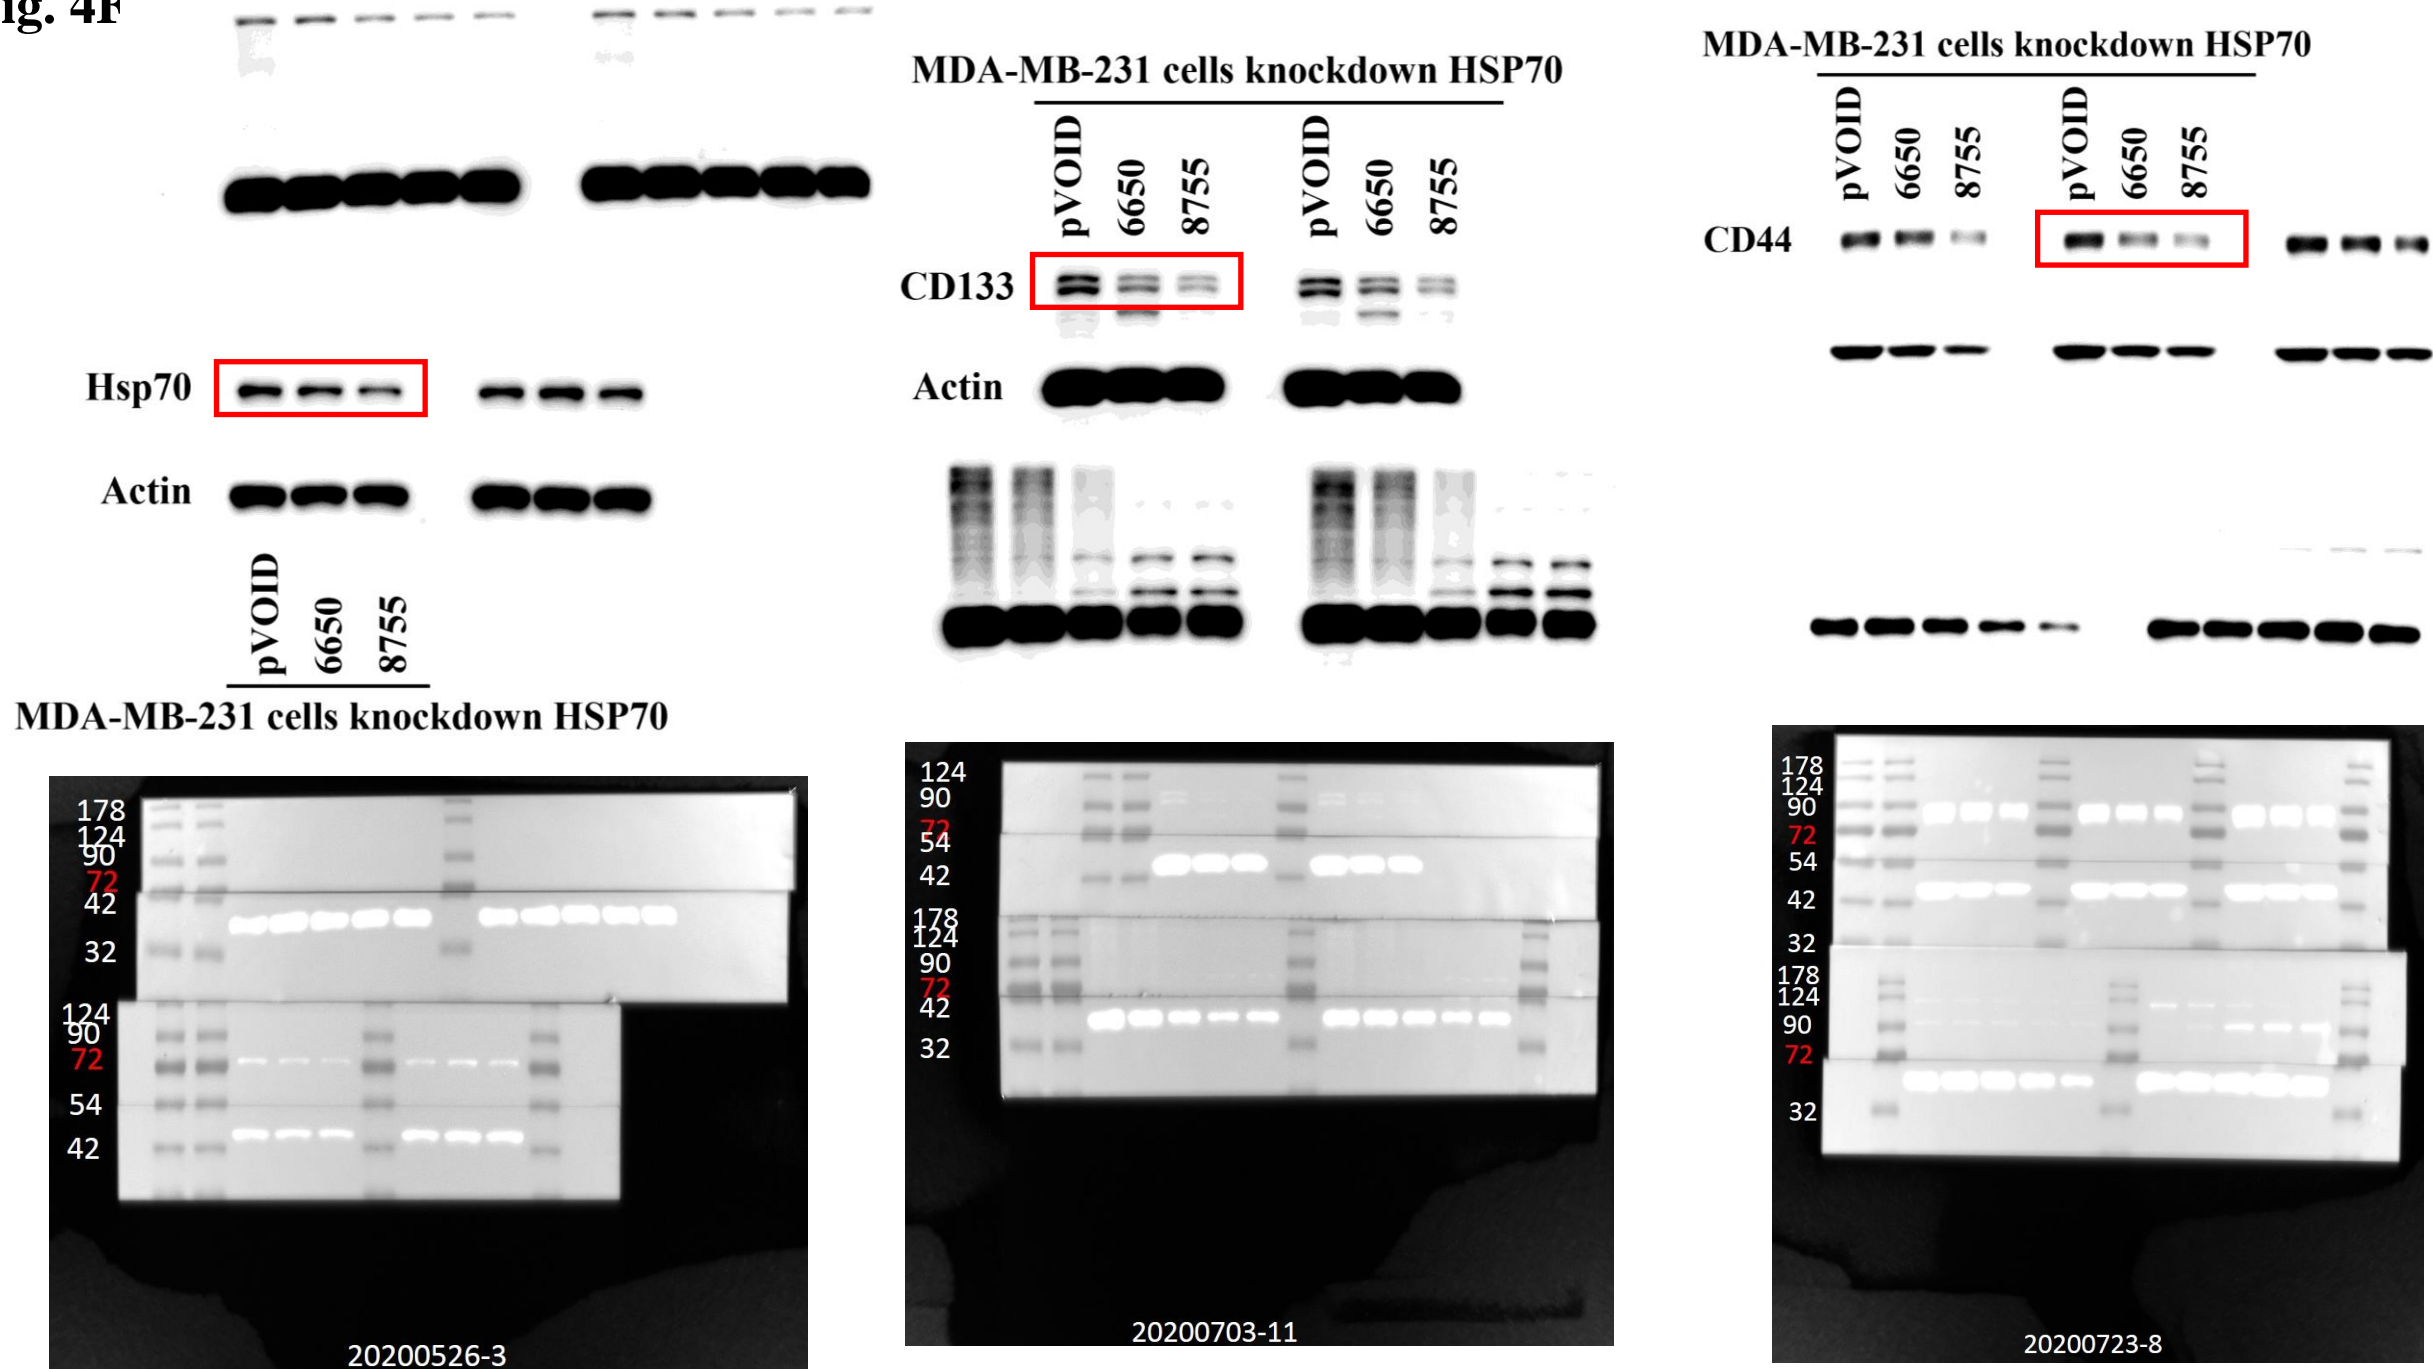

**Fig. 4F**

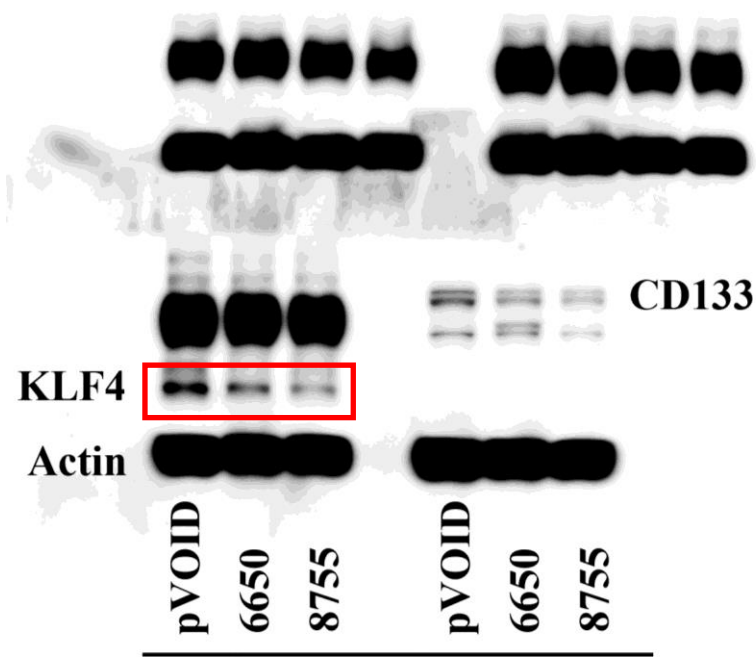

**MDA-MB-231 cells knockdown HSP70**

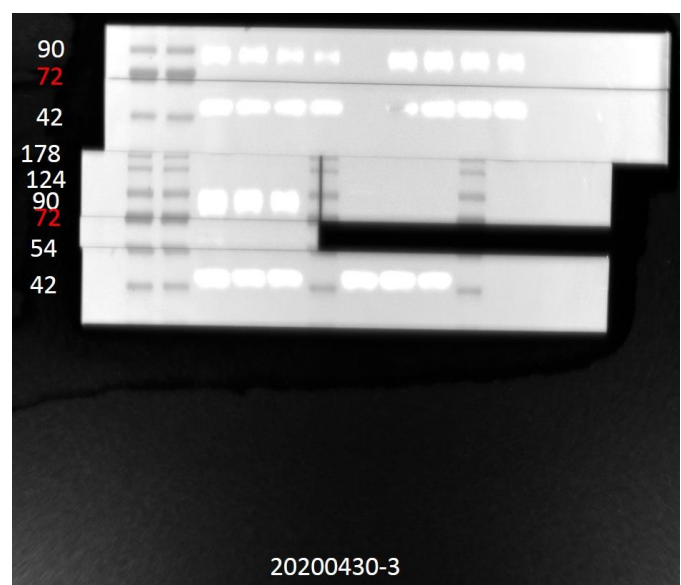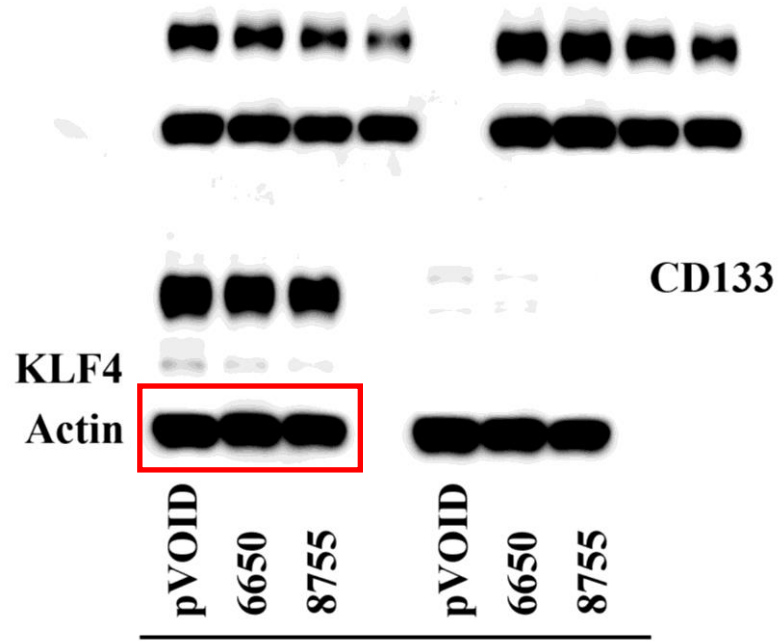

**MDA-MB-231 cells knockdown HSP70**

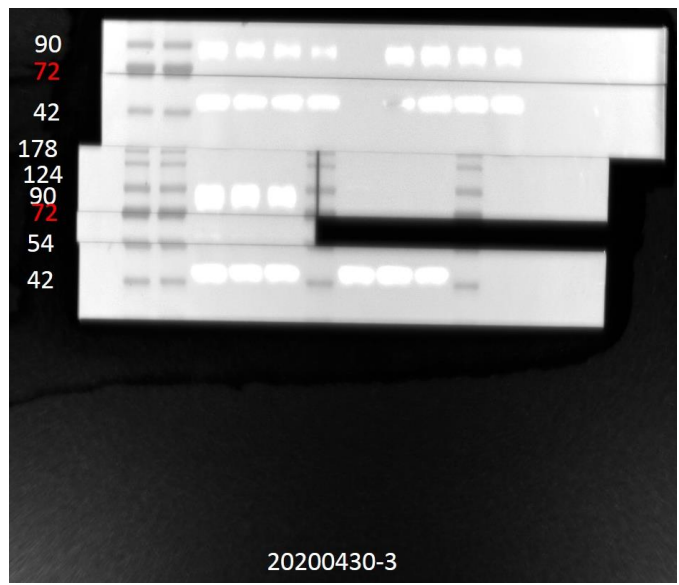

Fig. 5A

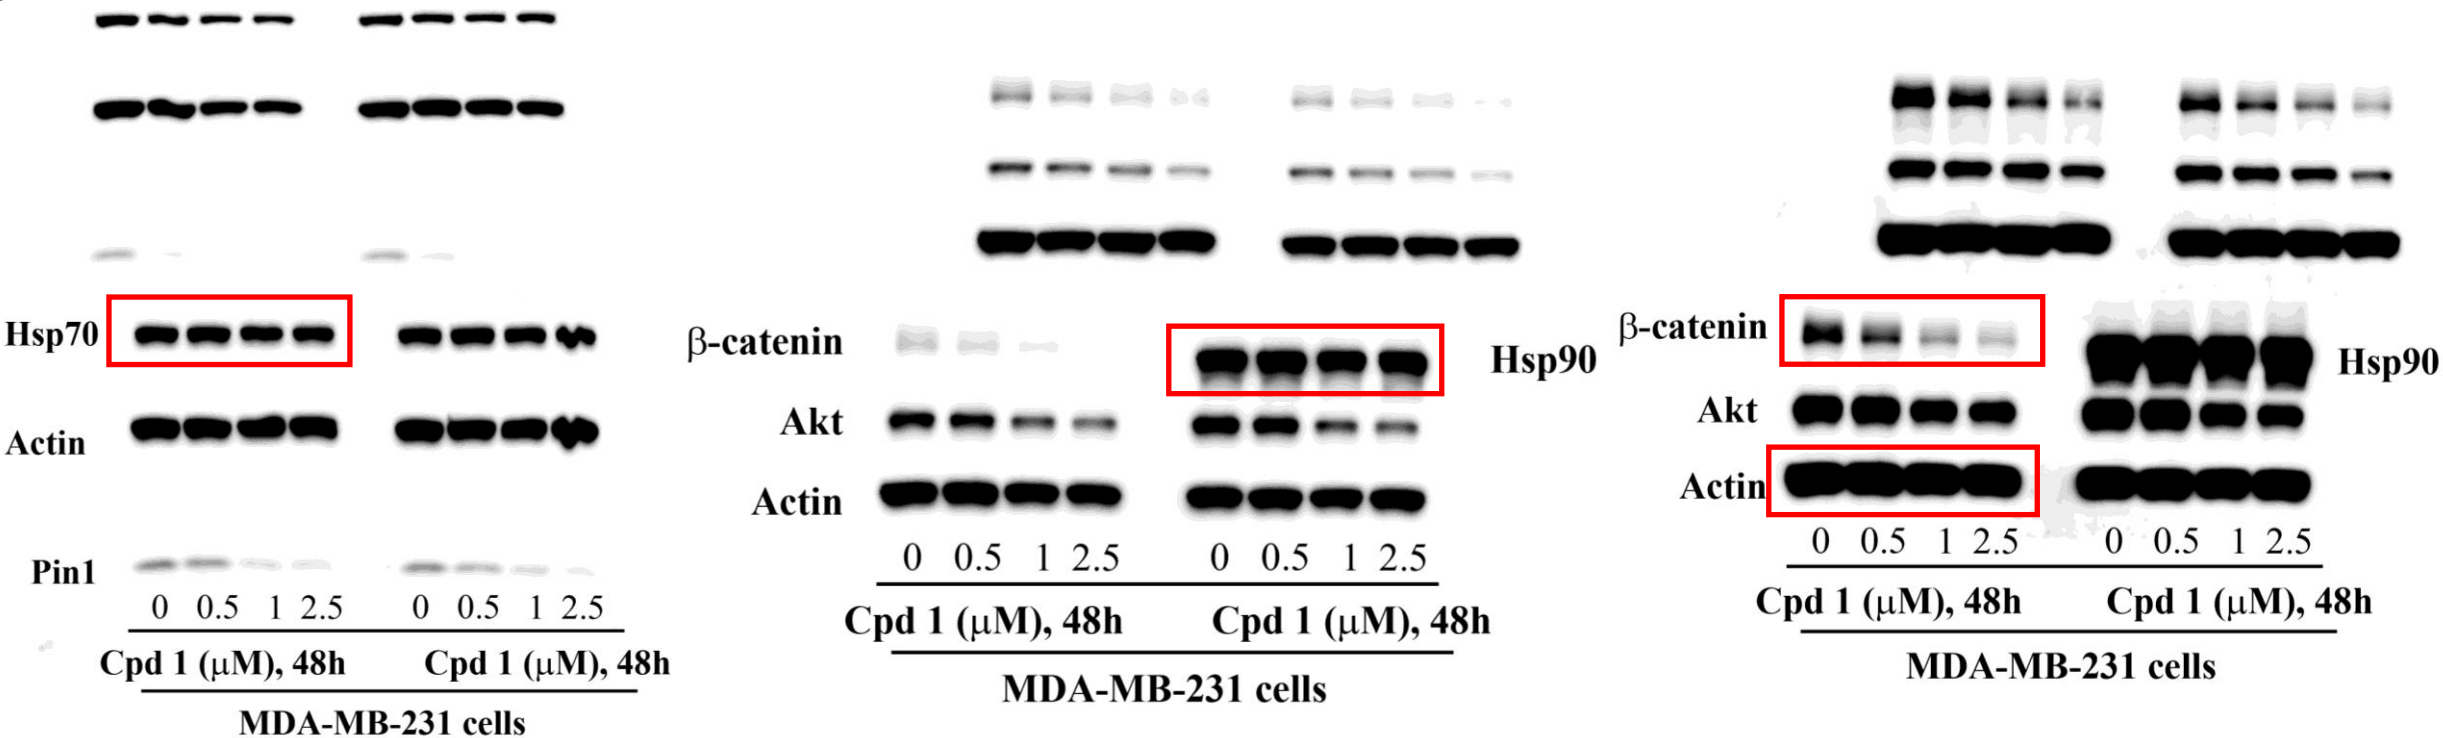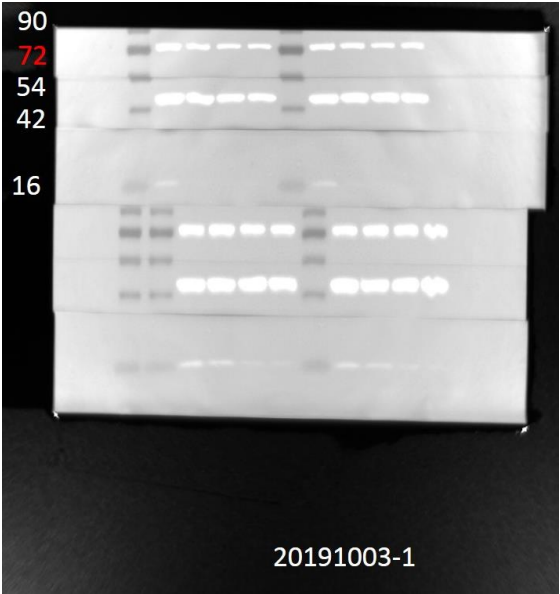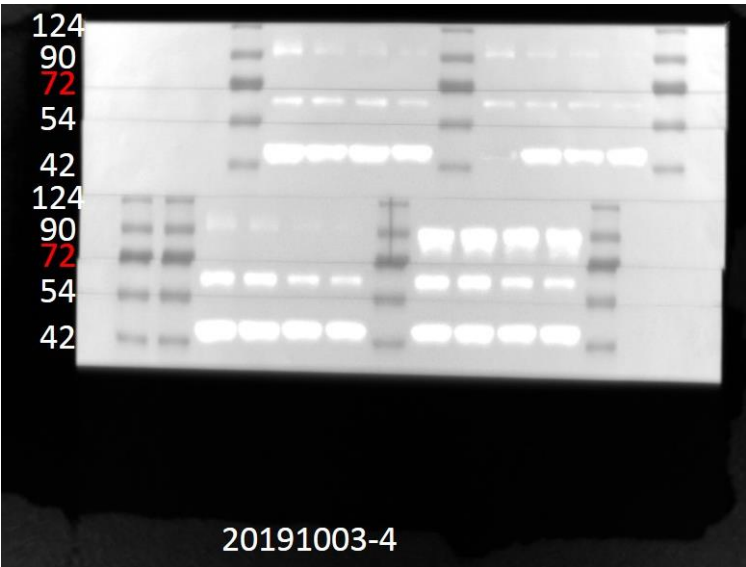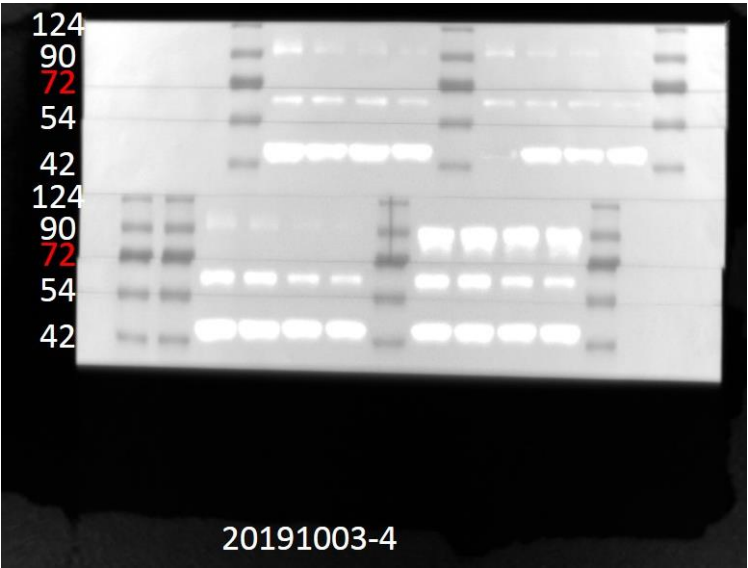

**Fig. 5A**

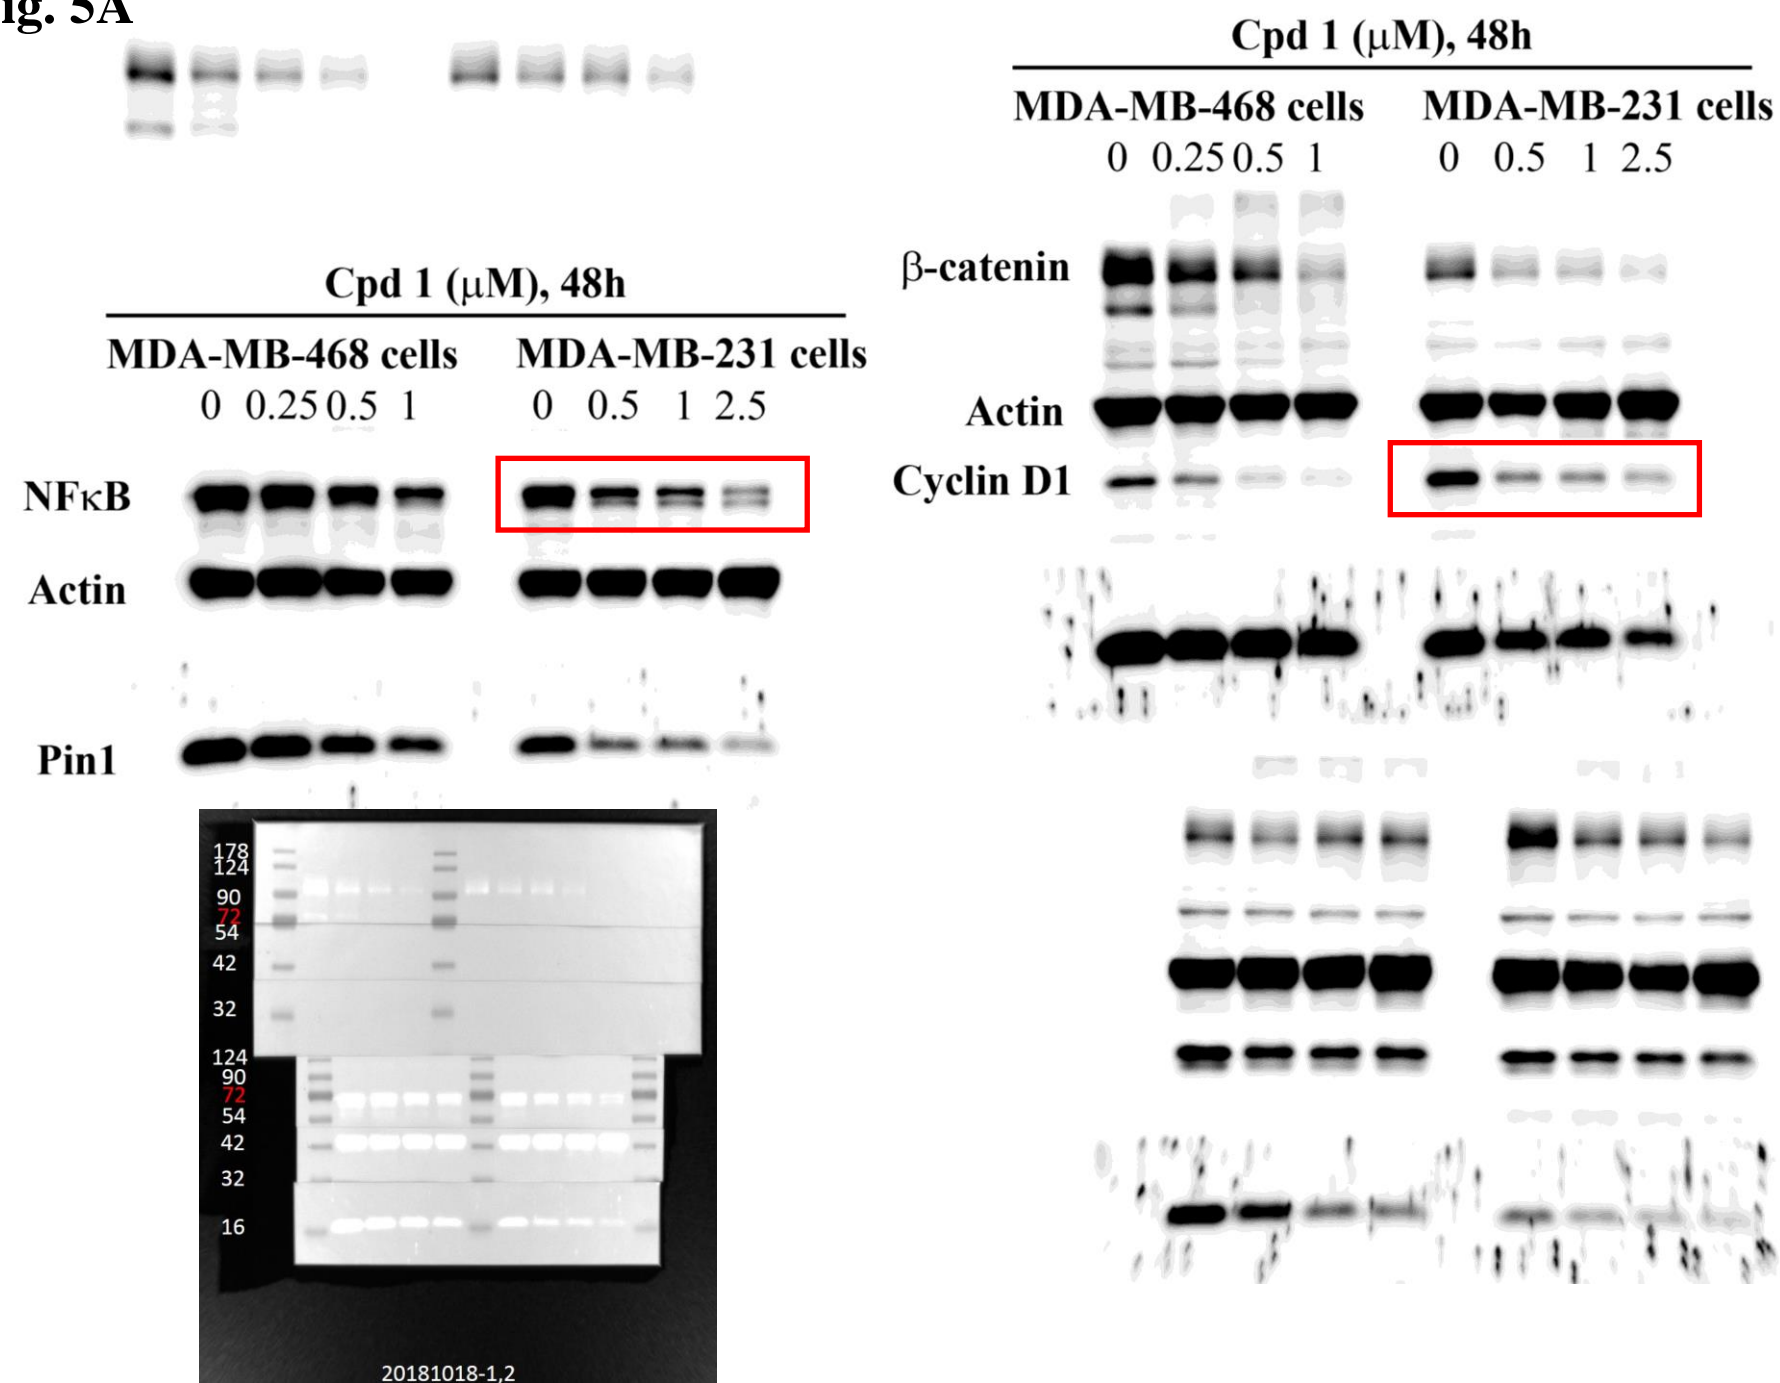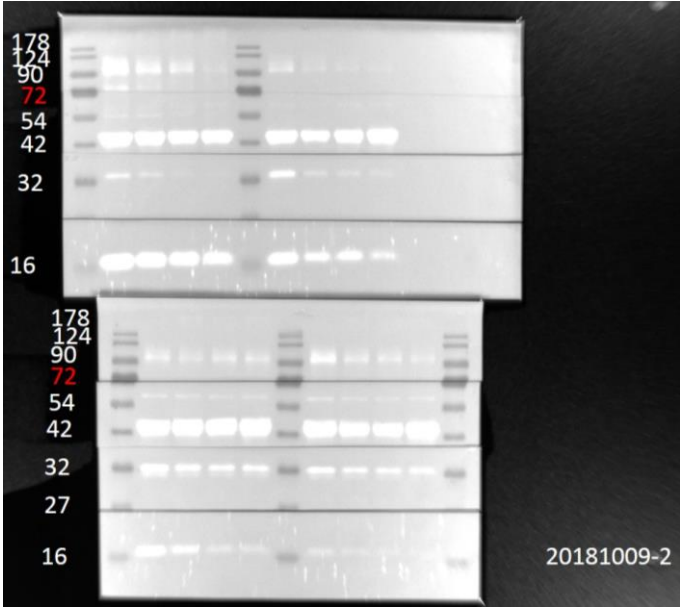



**Fig. 5A**

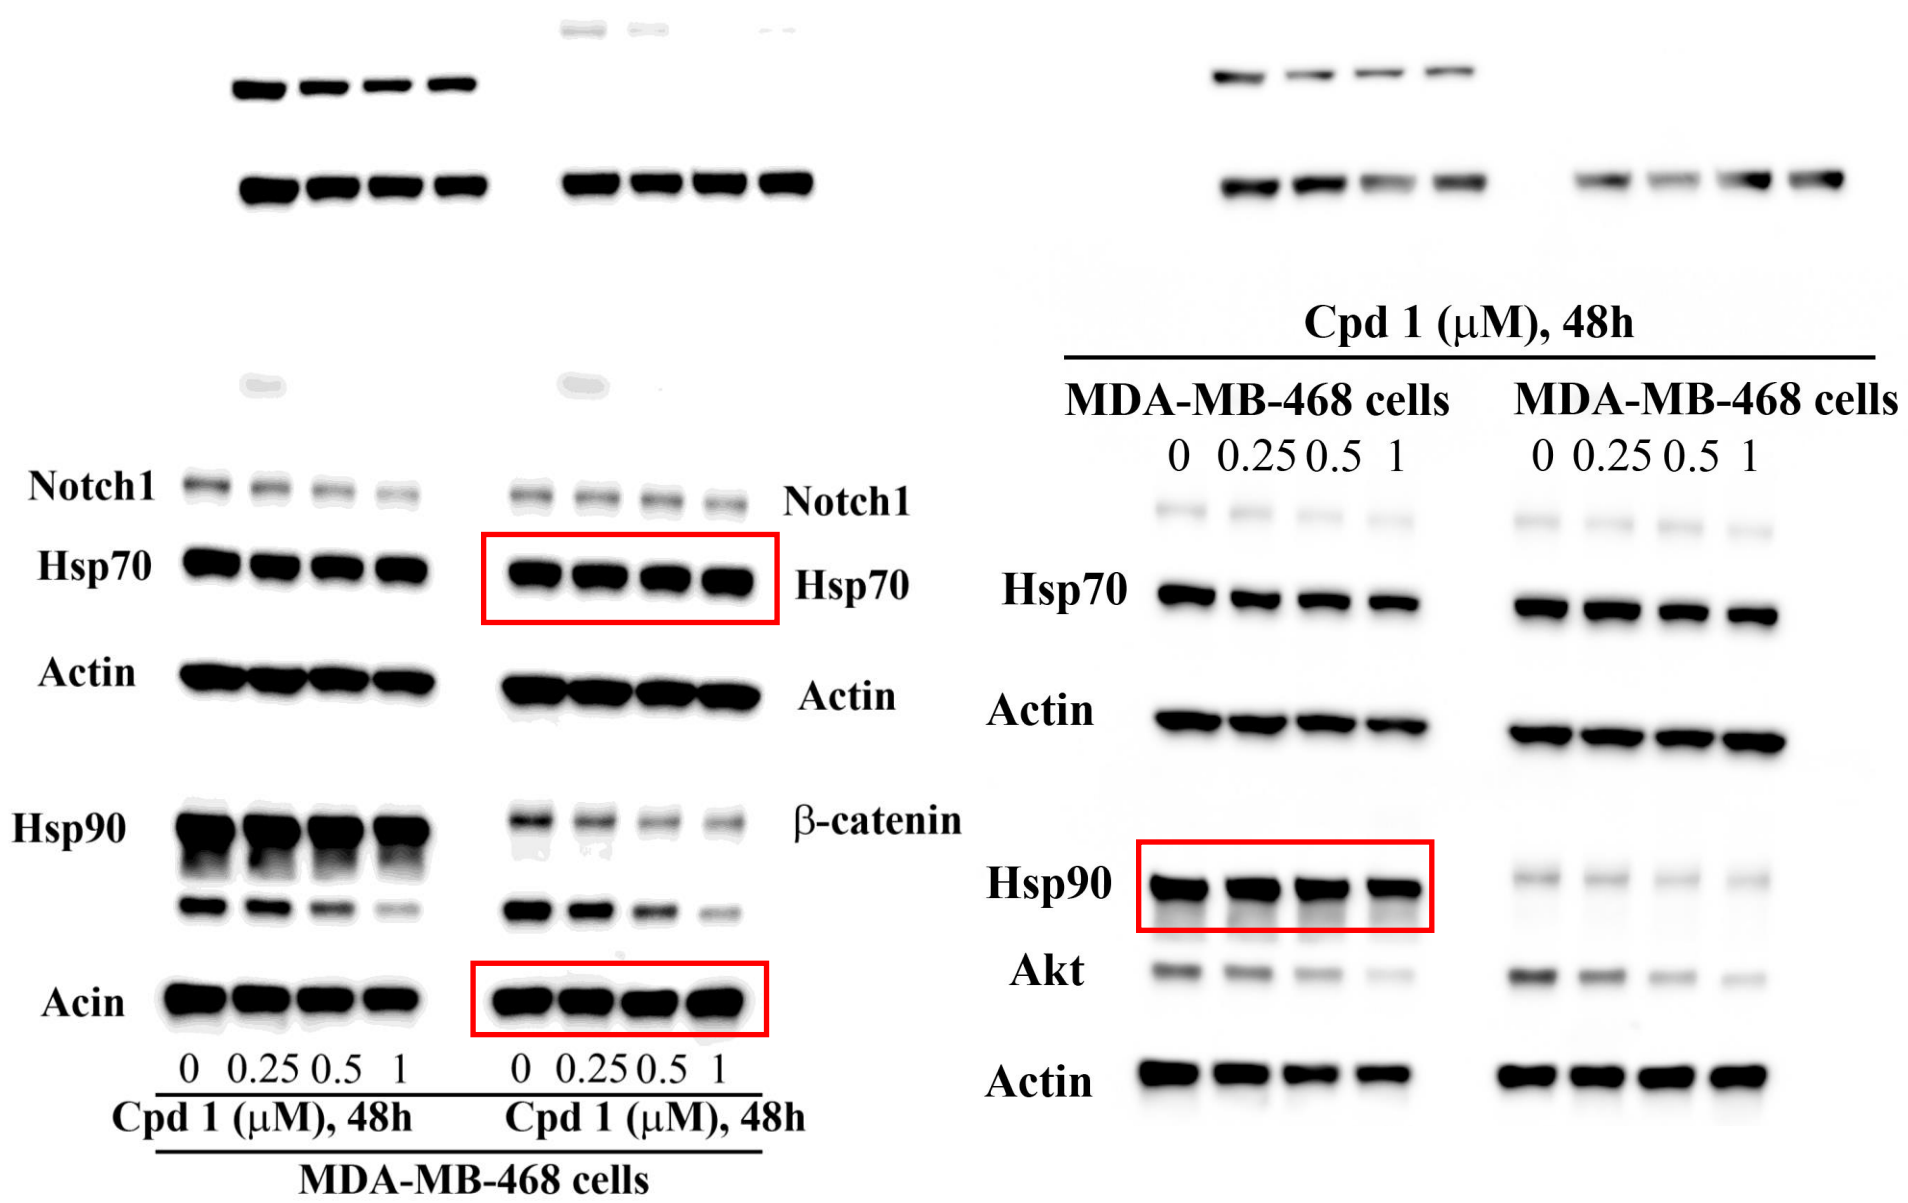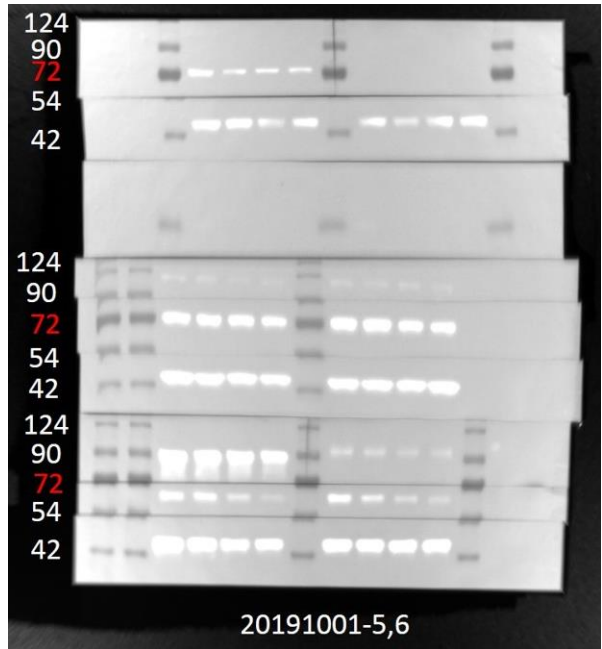

**Fig. 5A**

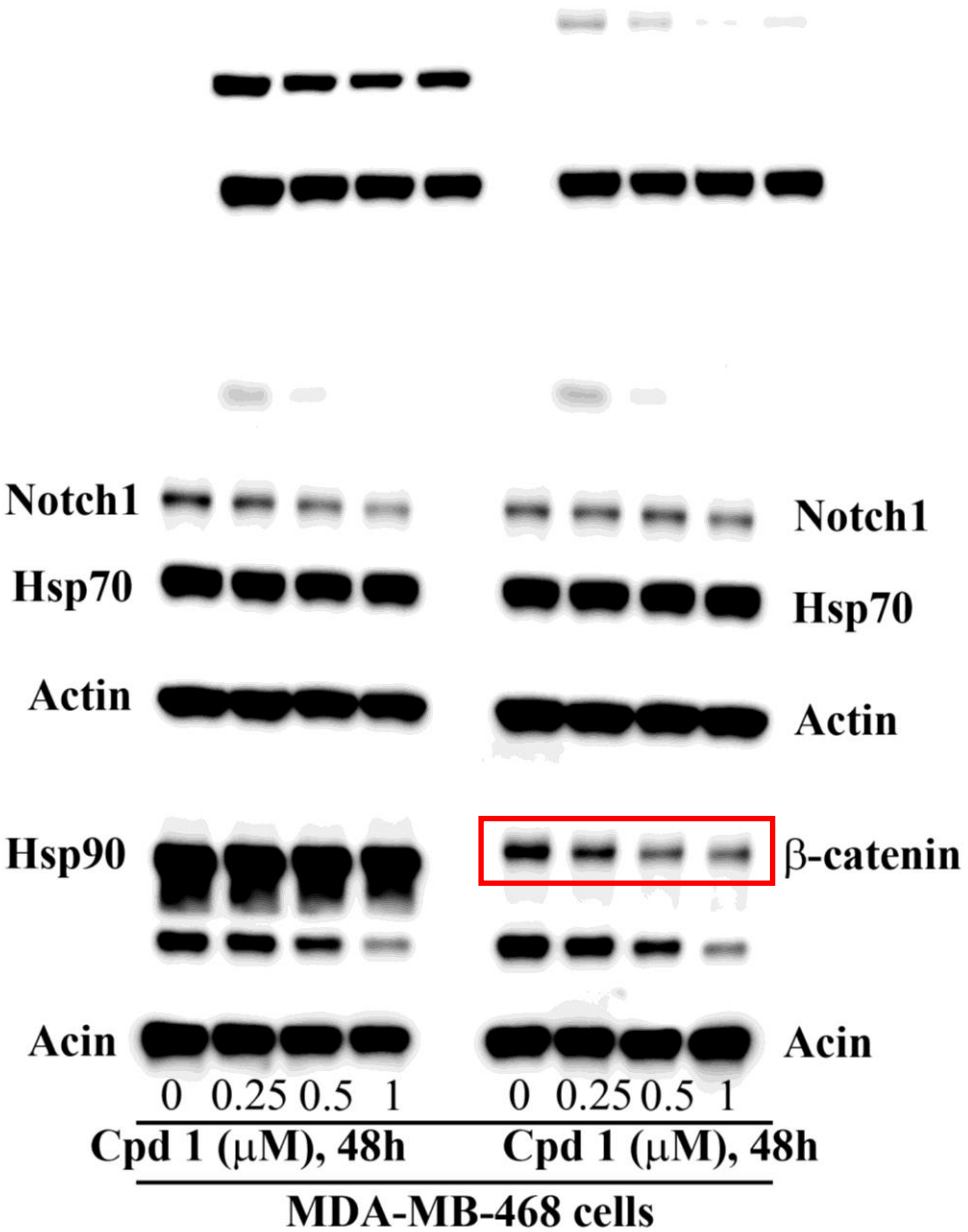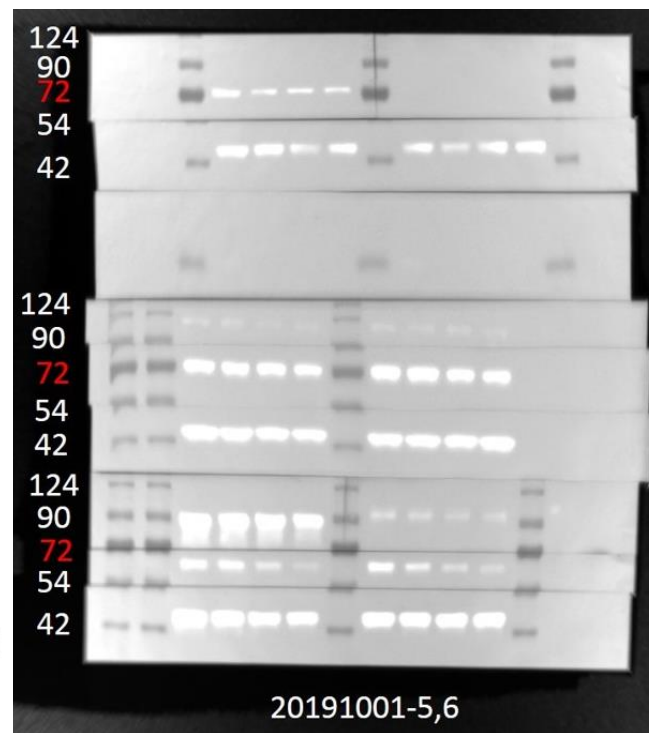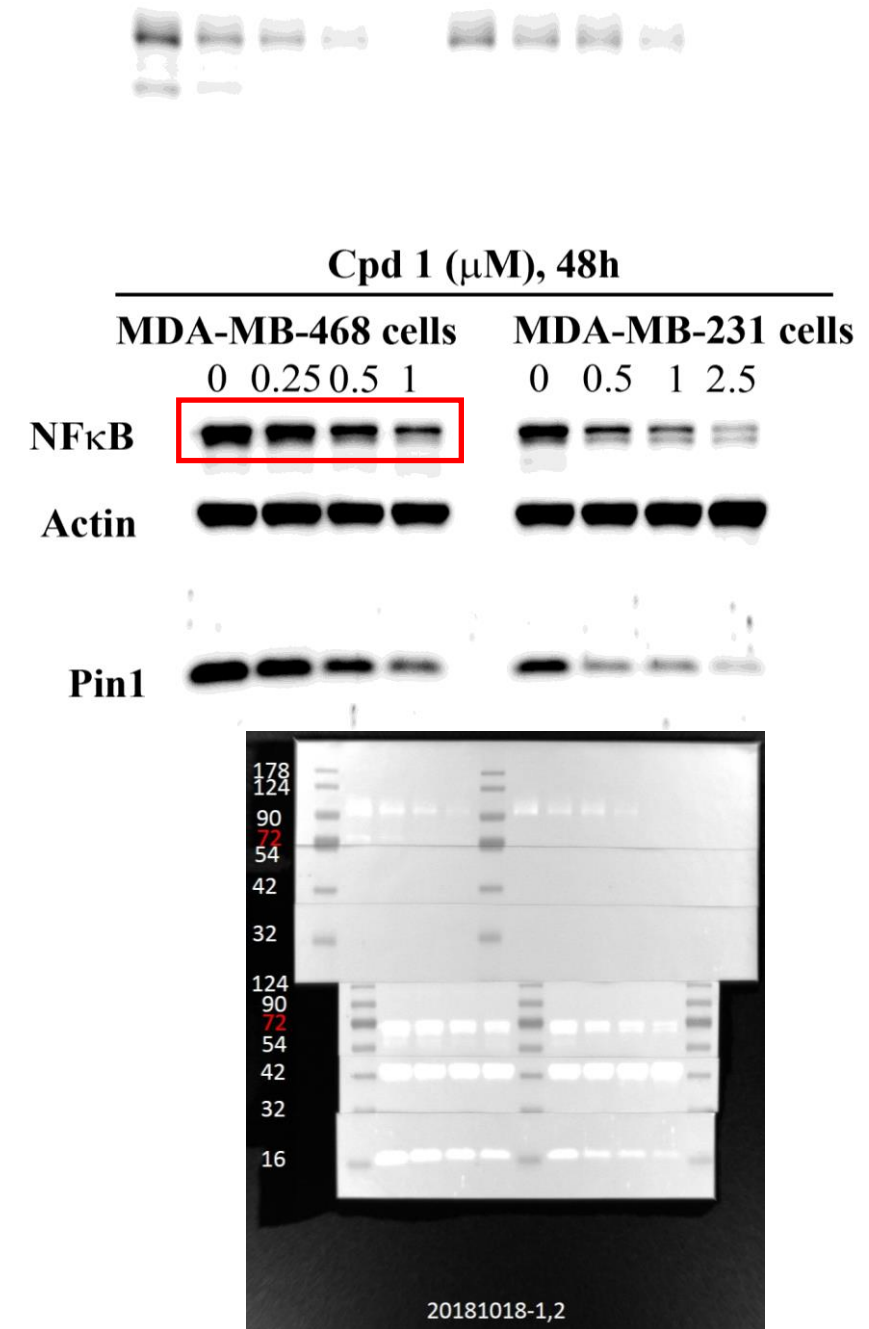

**Fig. 5A**

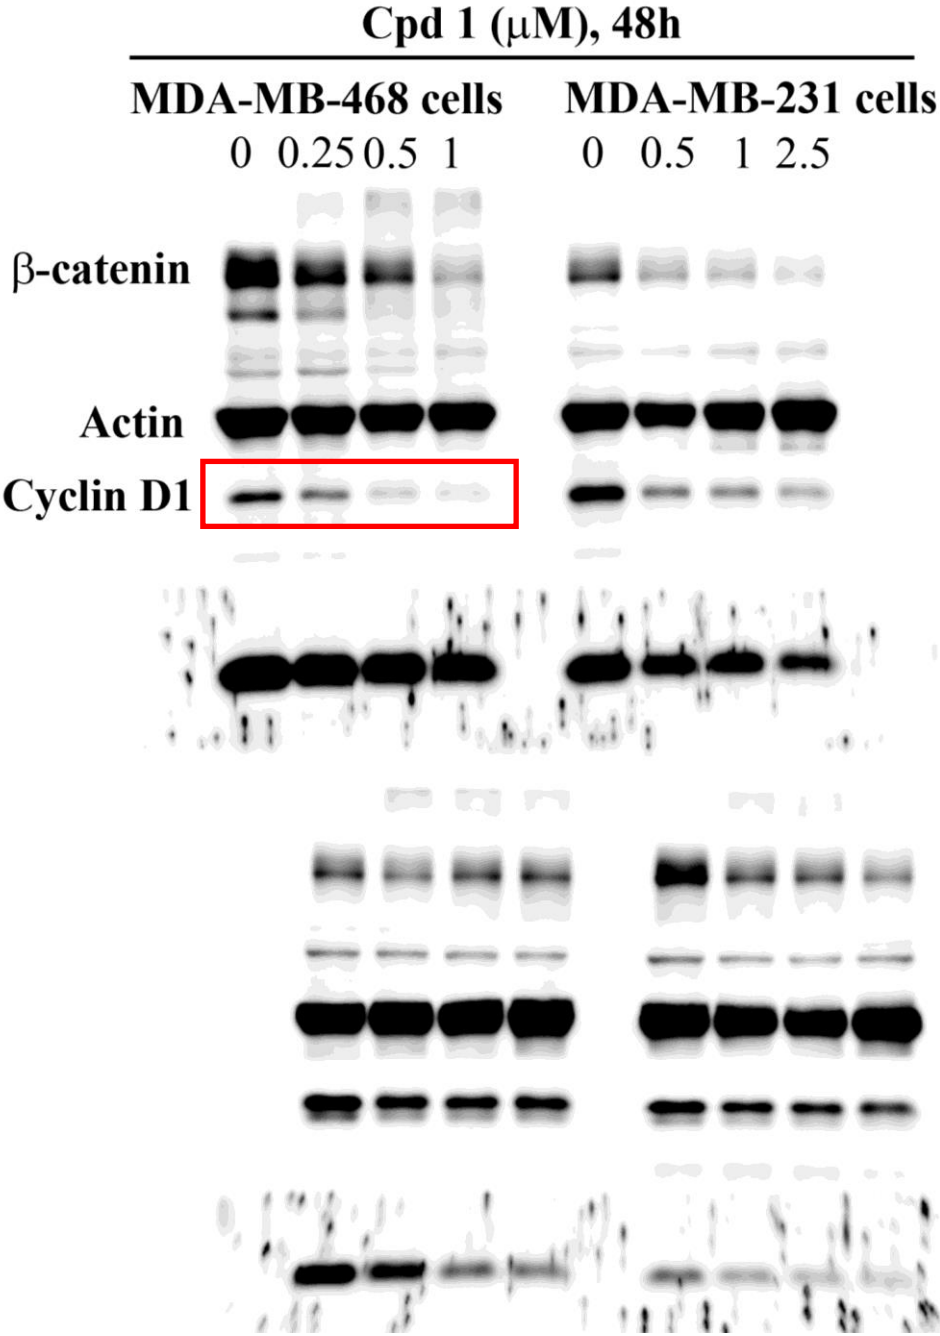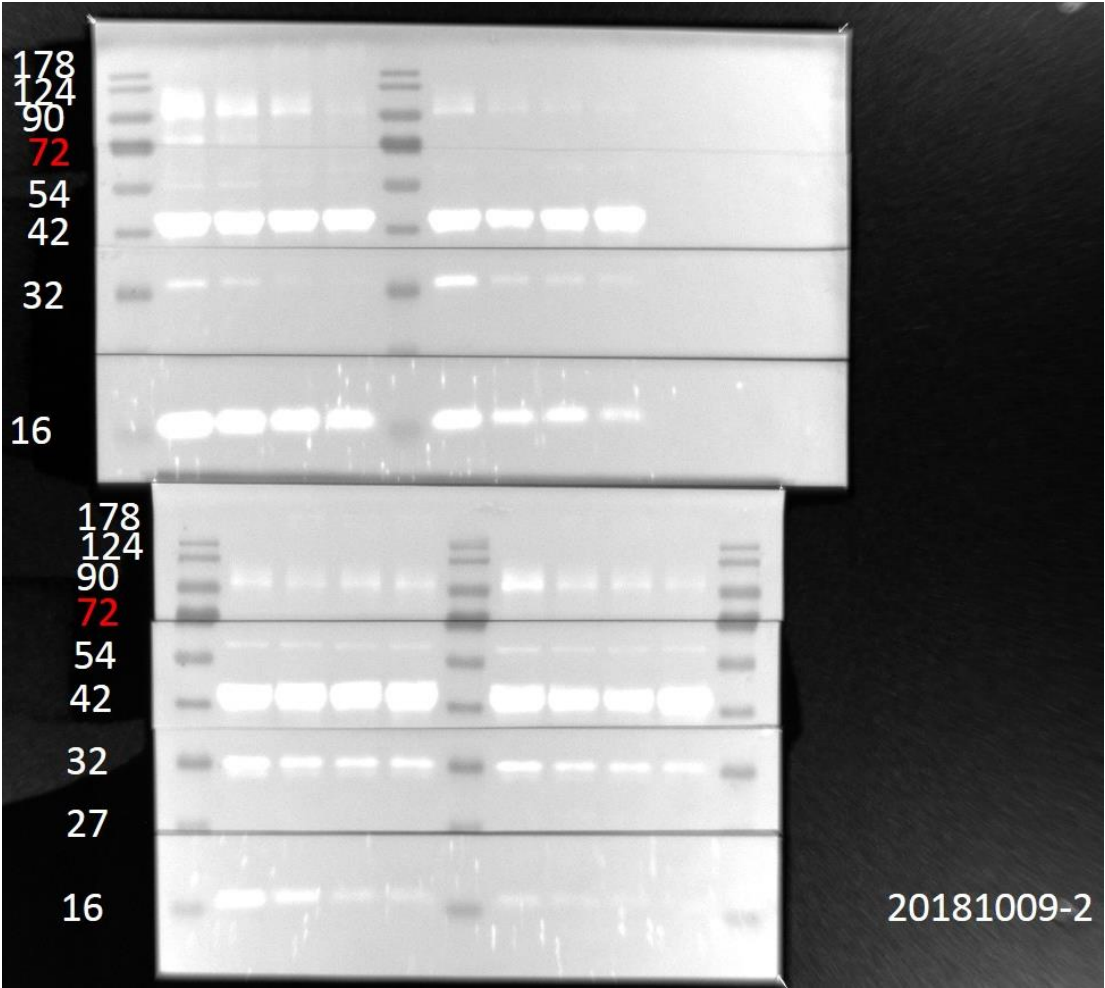

**Fig. 5A**

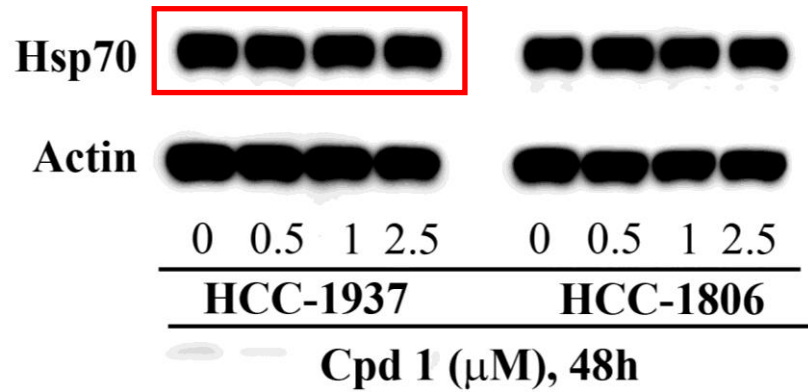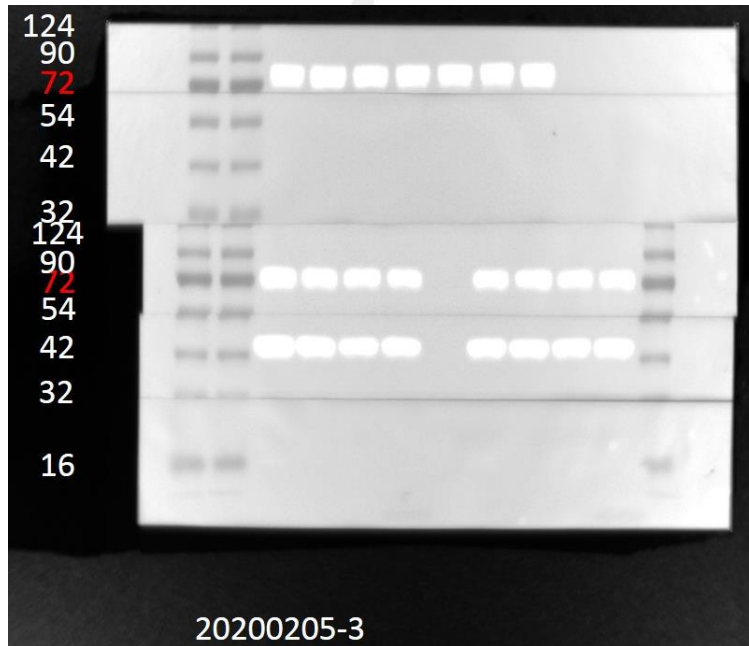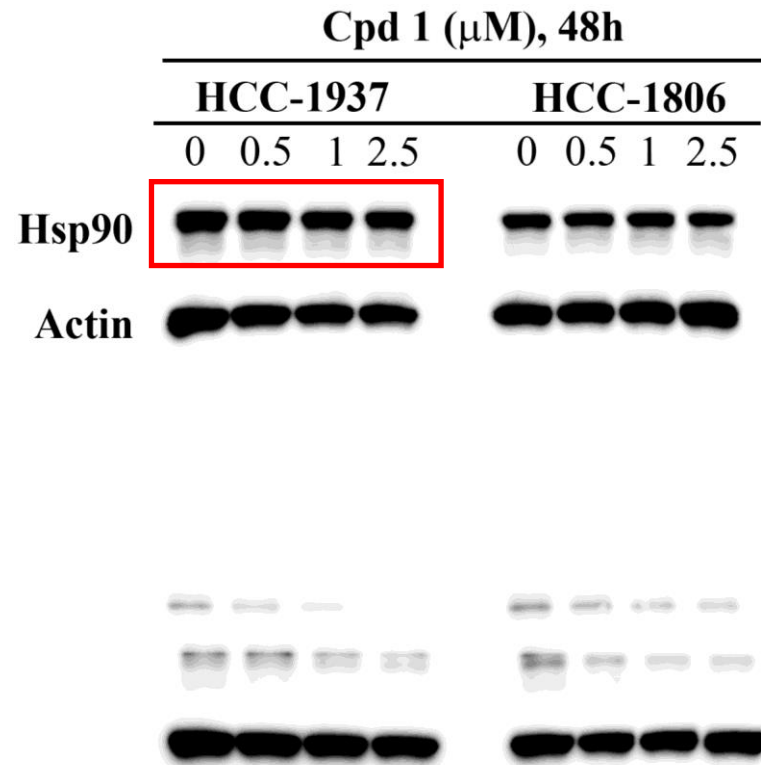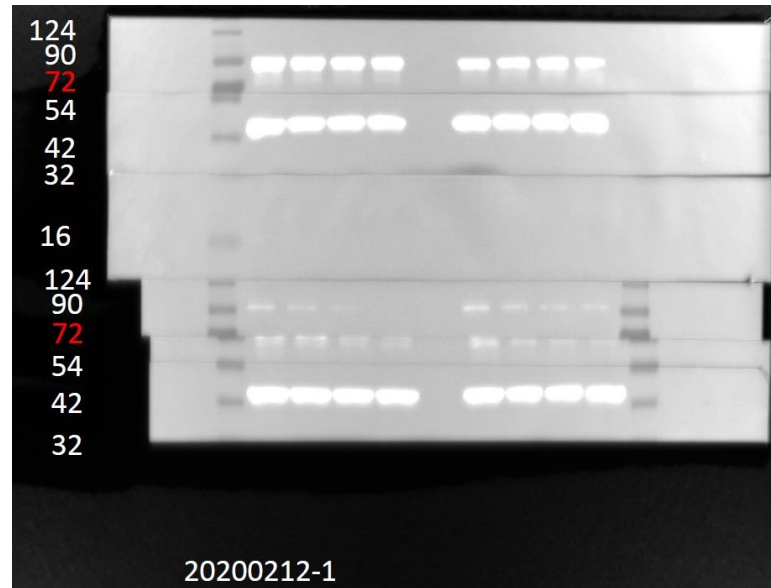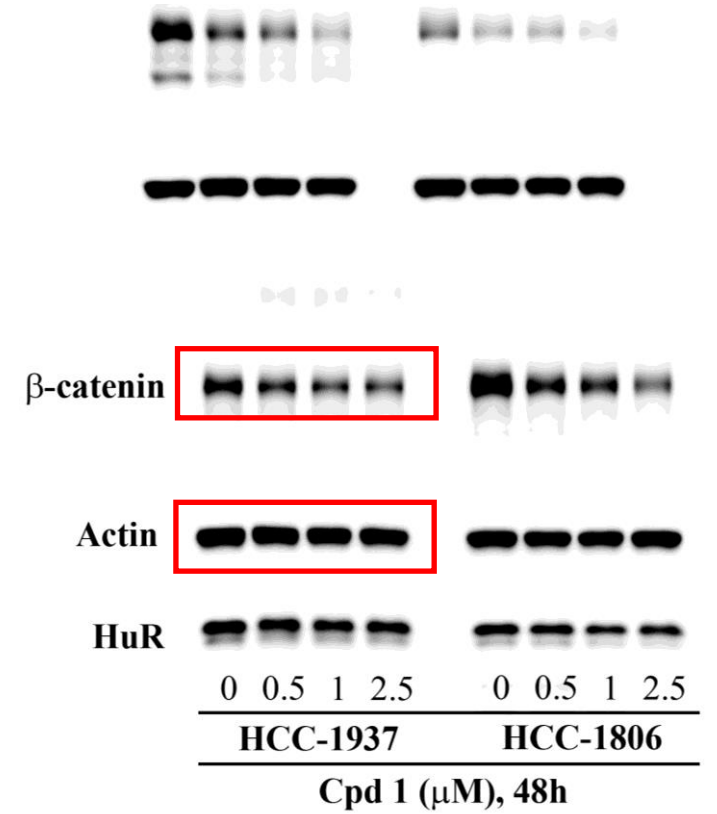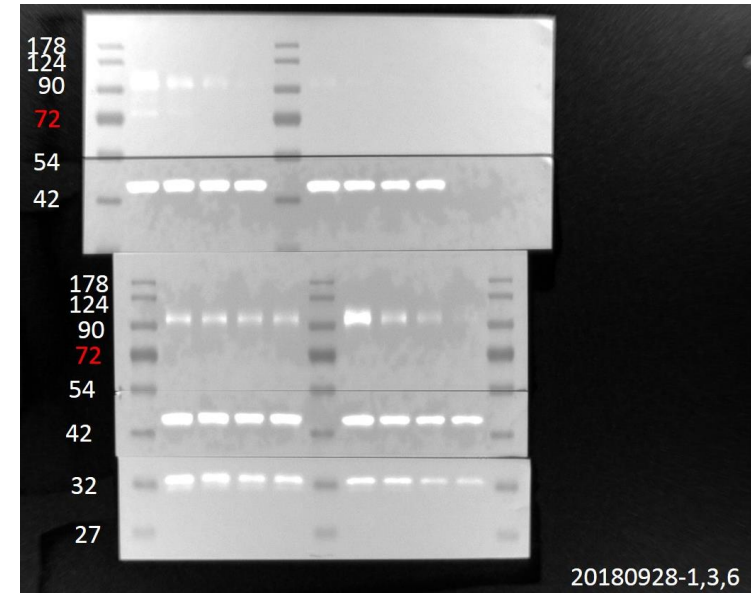



Fig. 5A

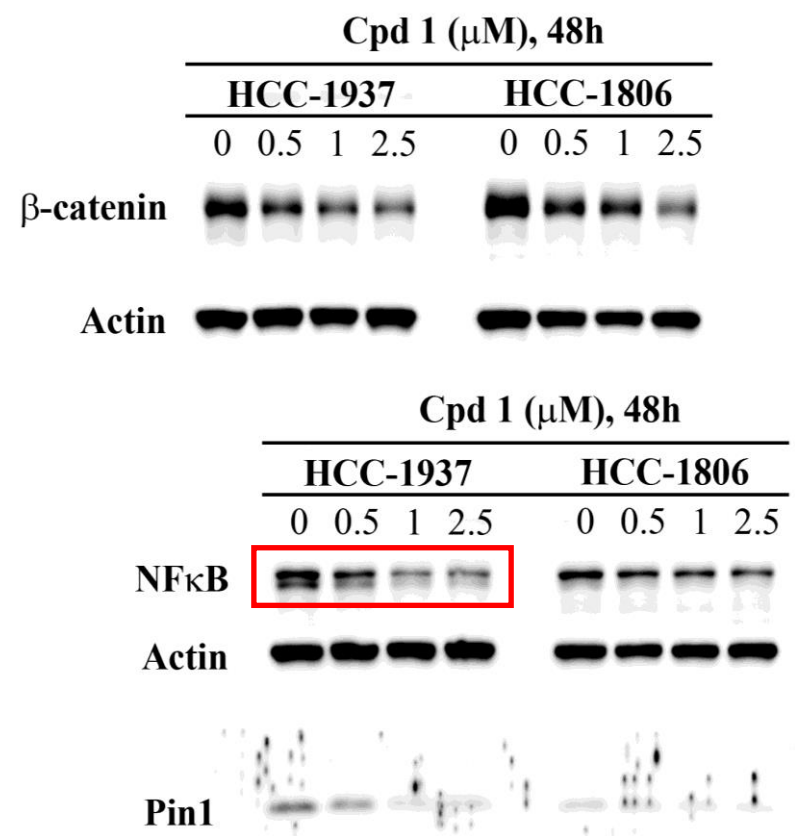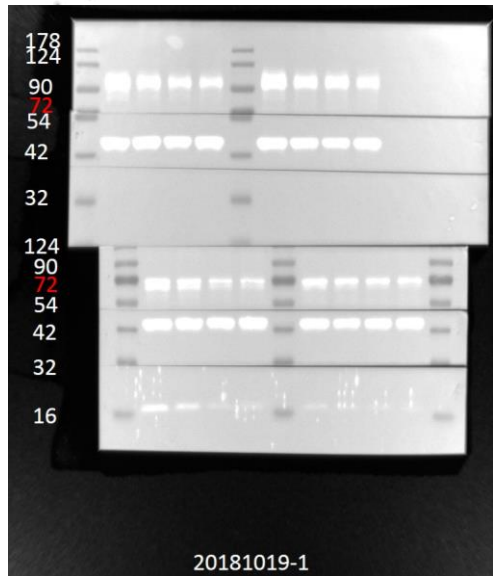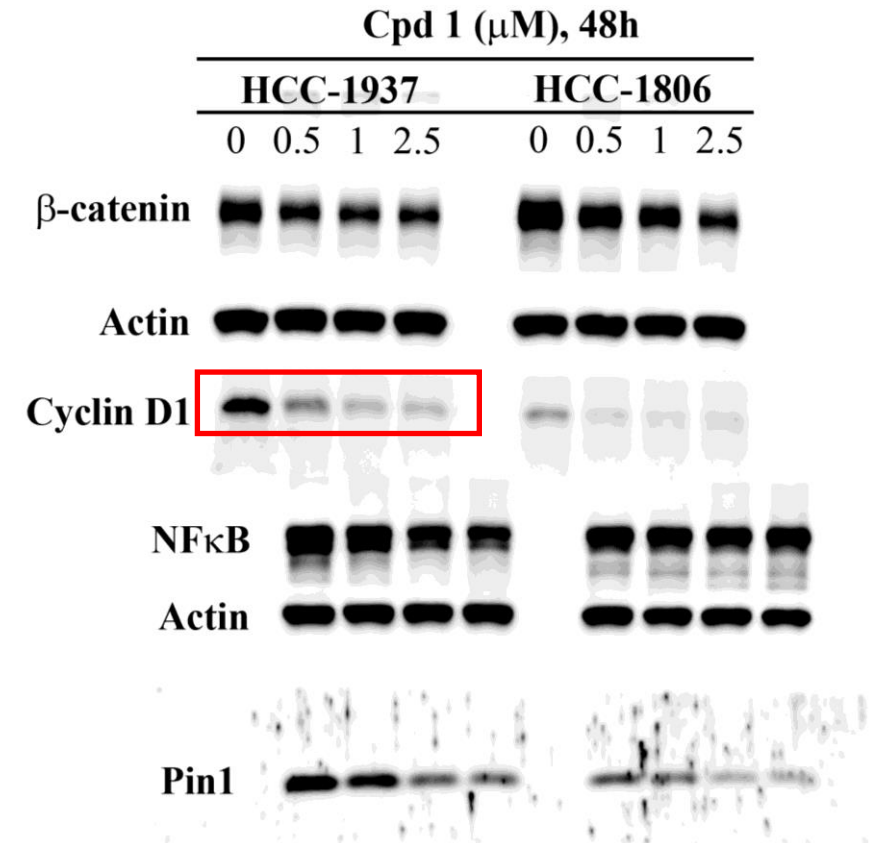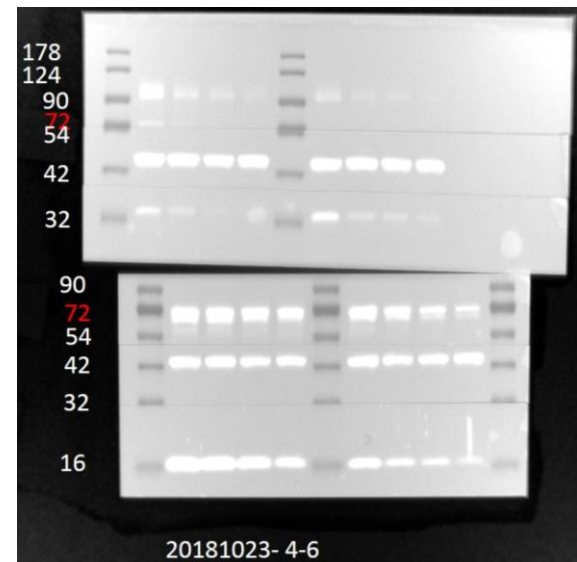

20200205-3

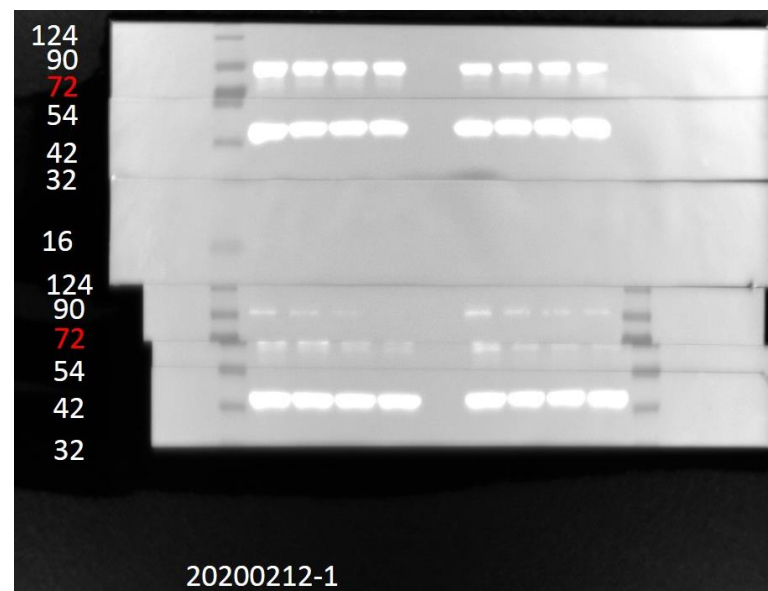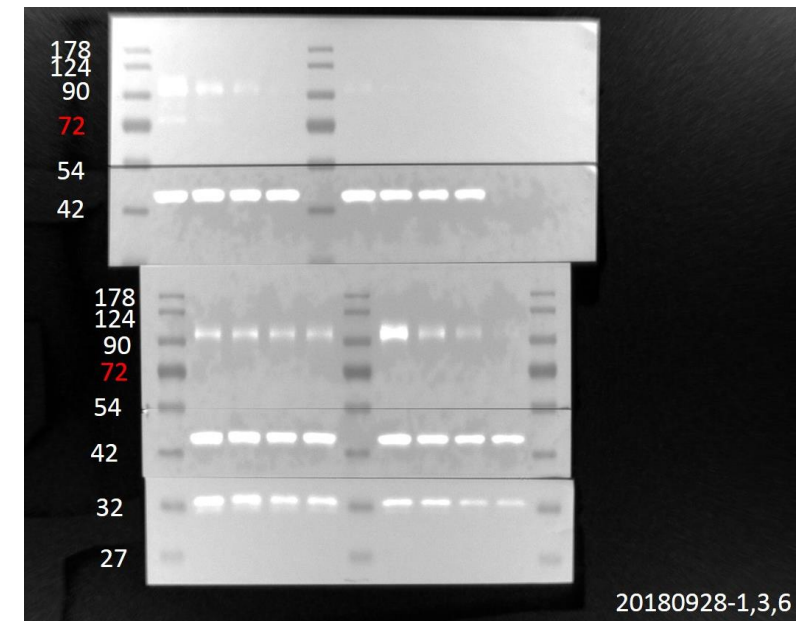

**Fig. 5A**

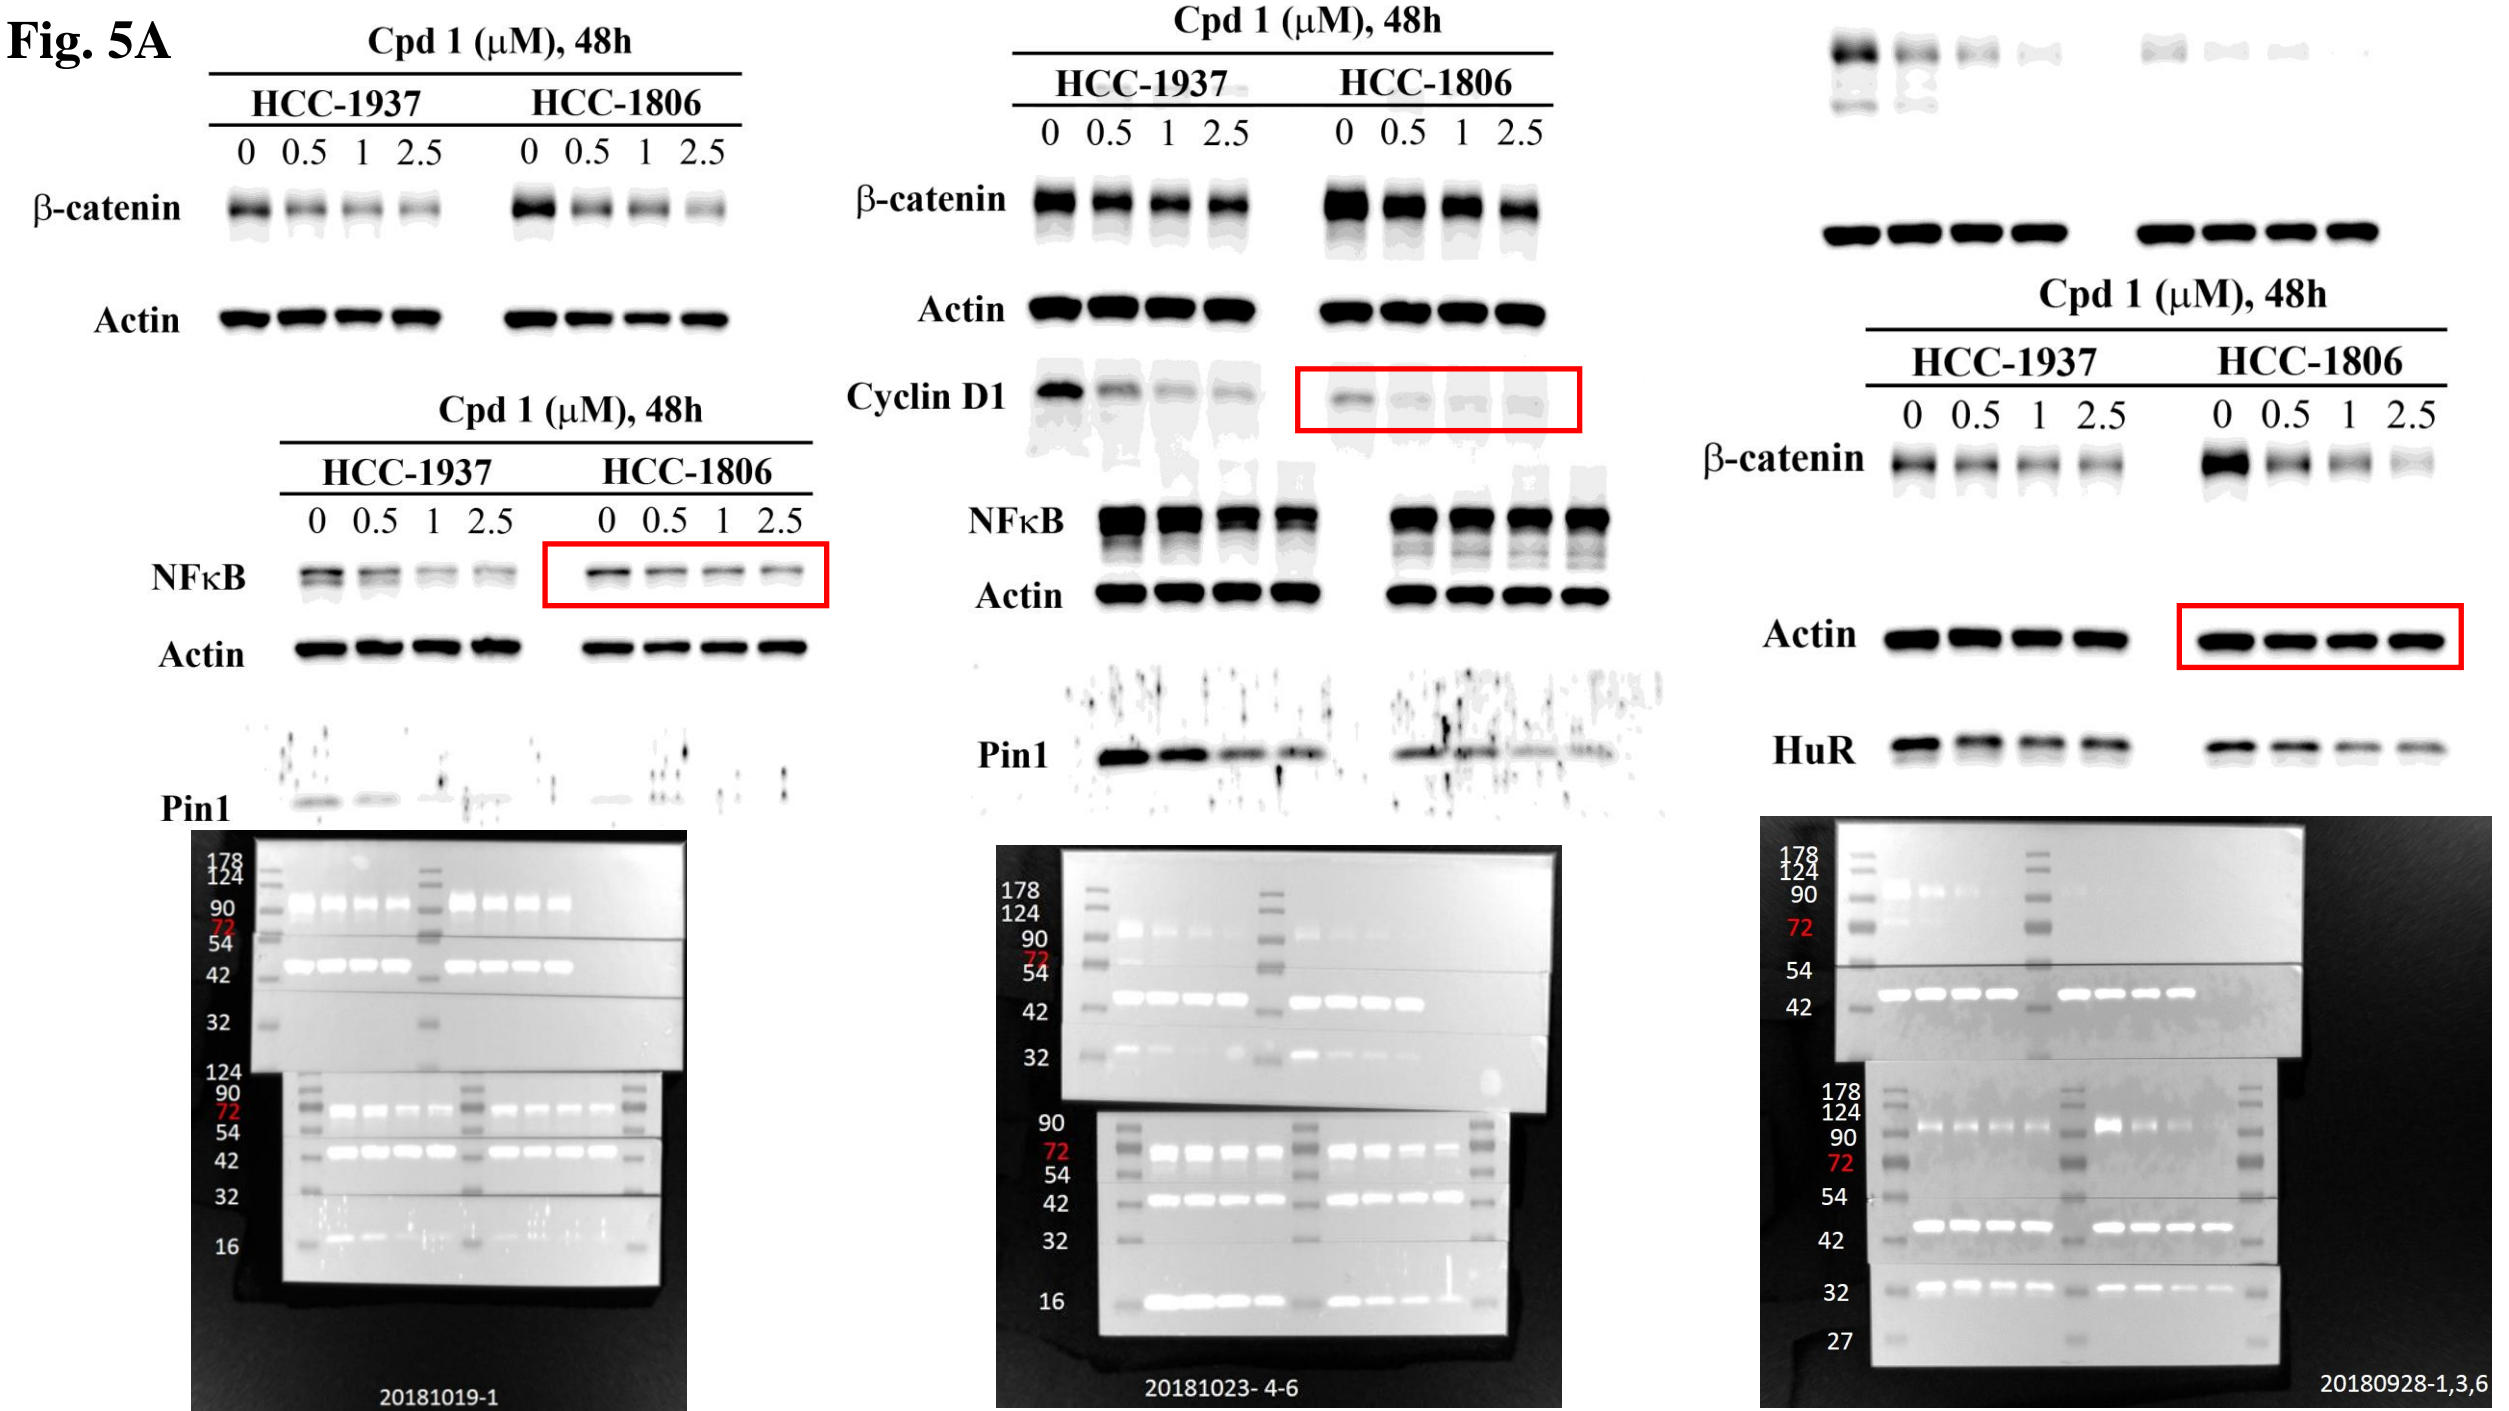



Fig. 5B

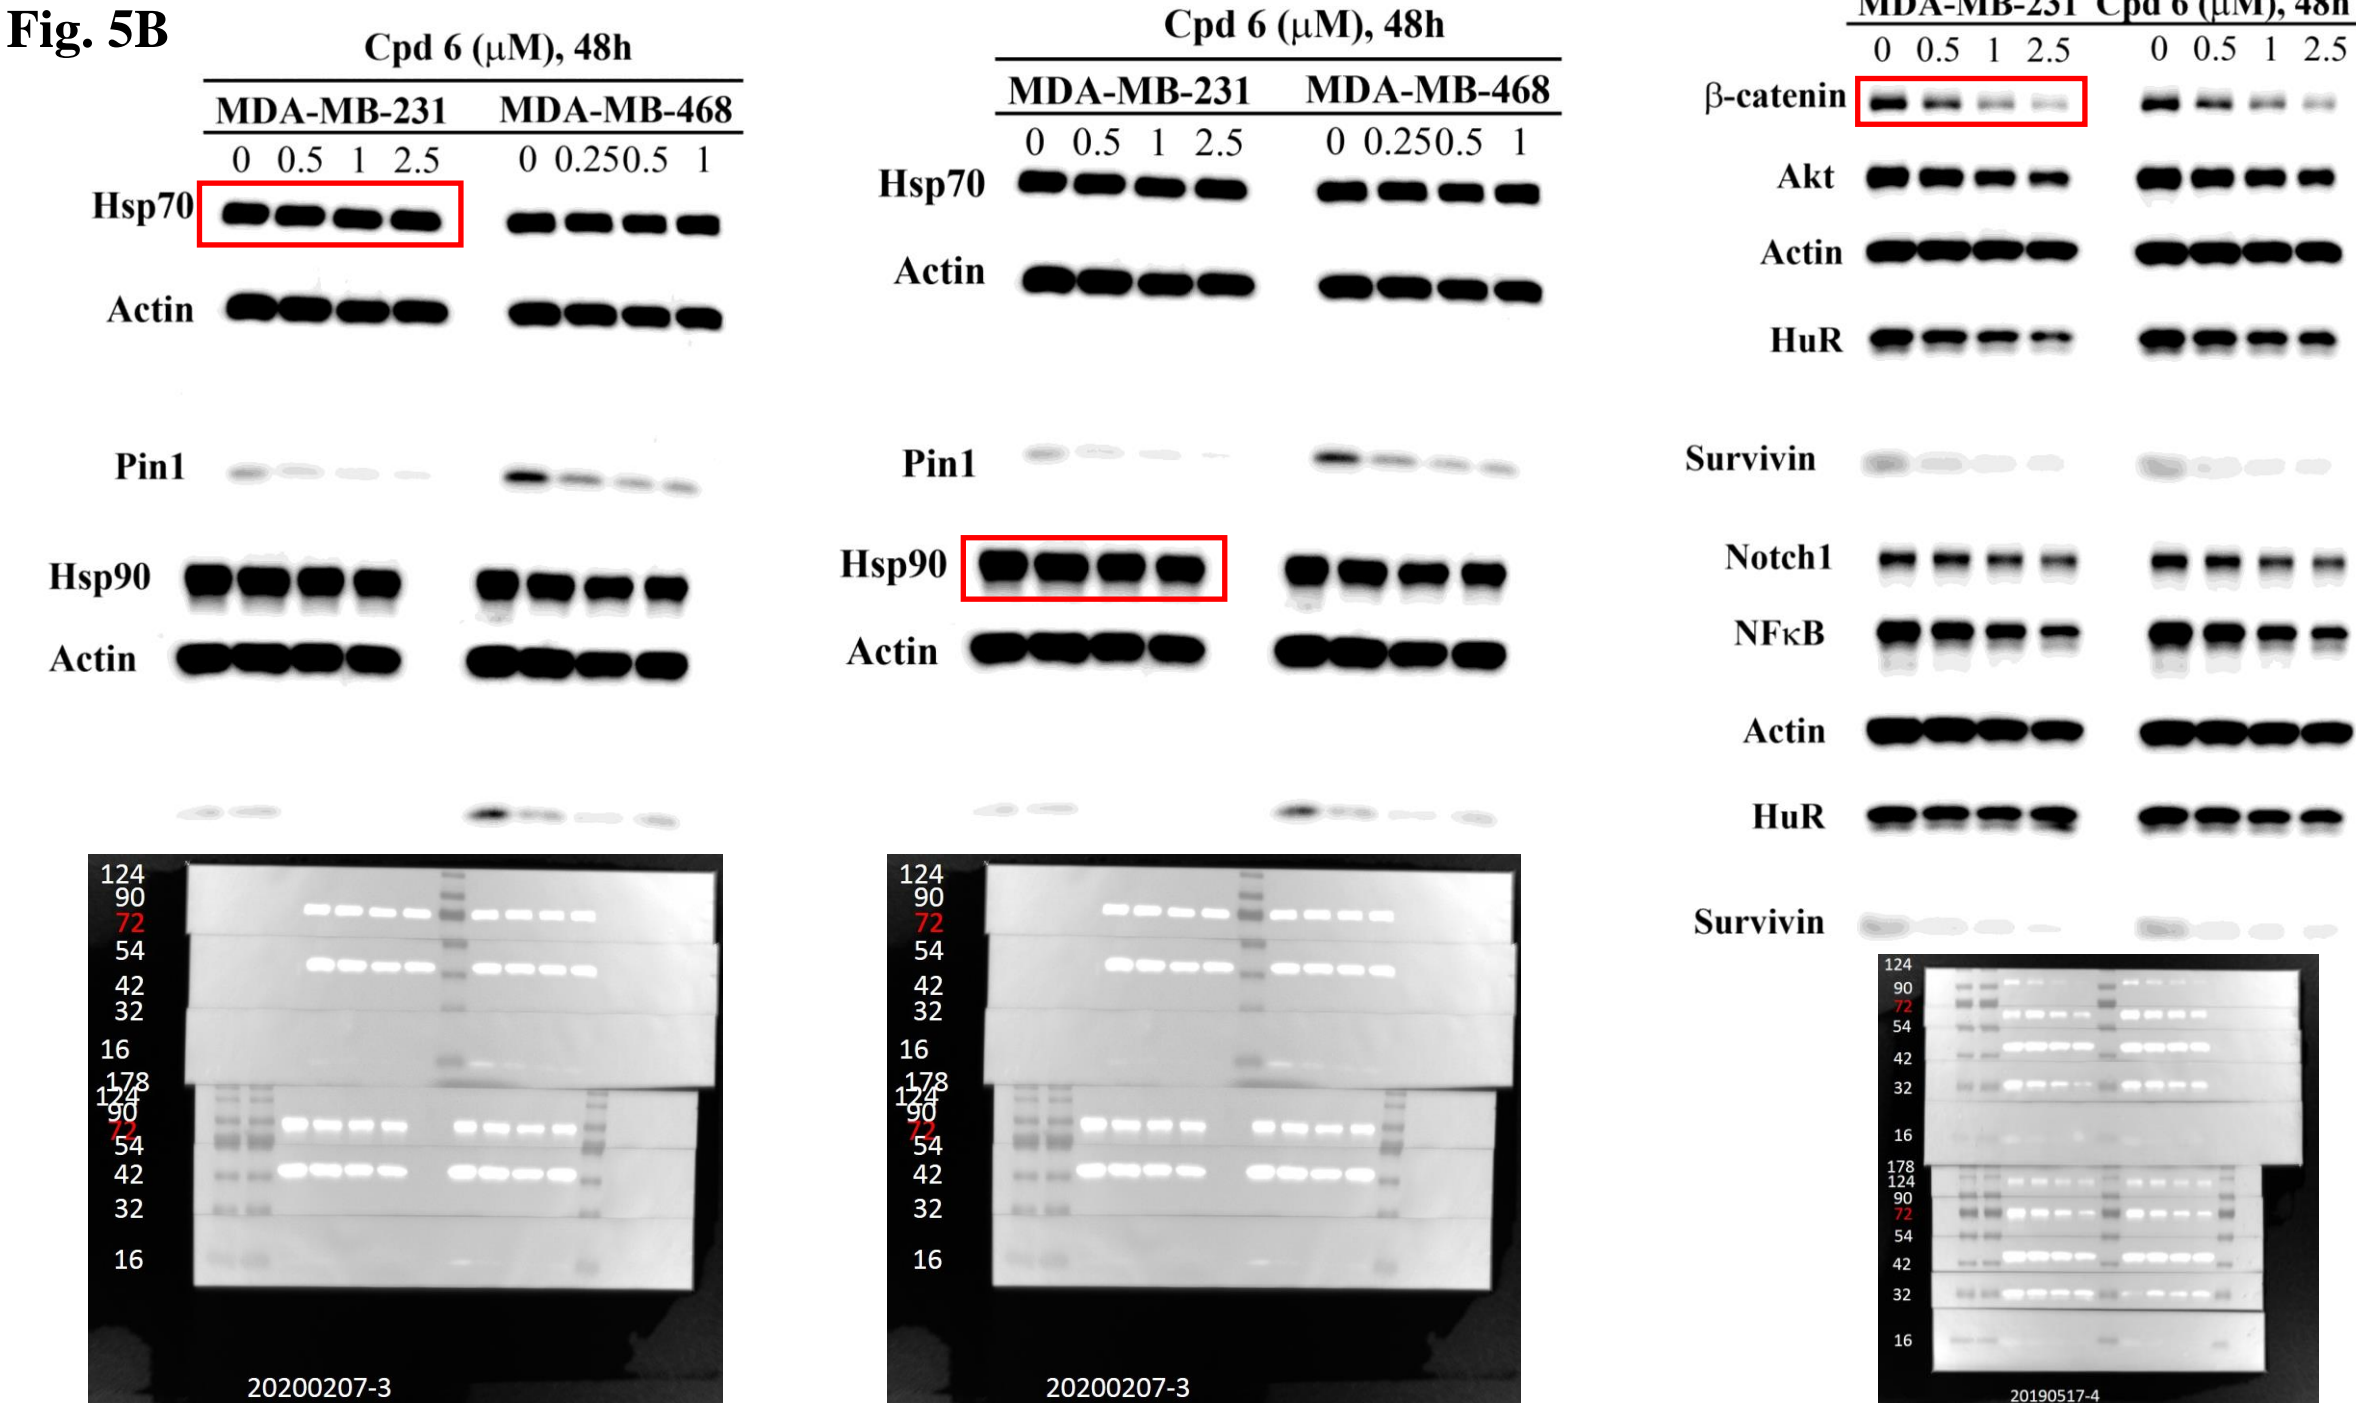





**Fig. 5B**

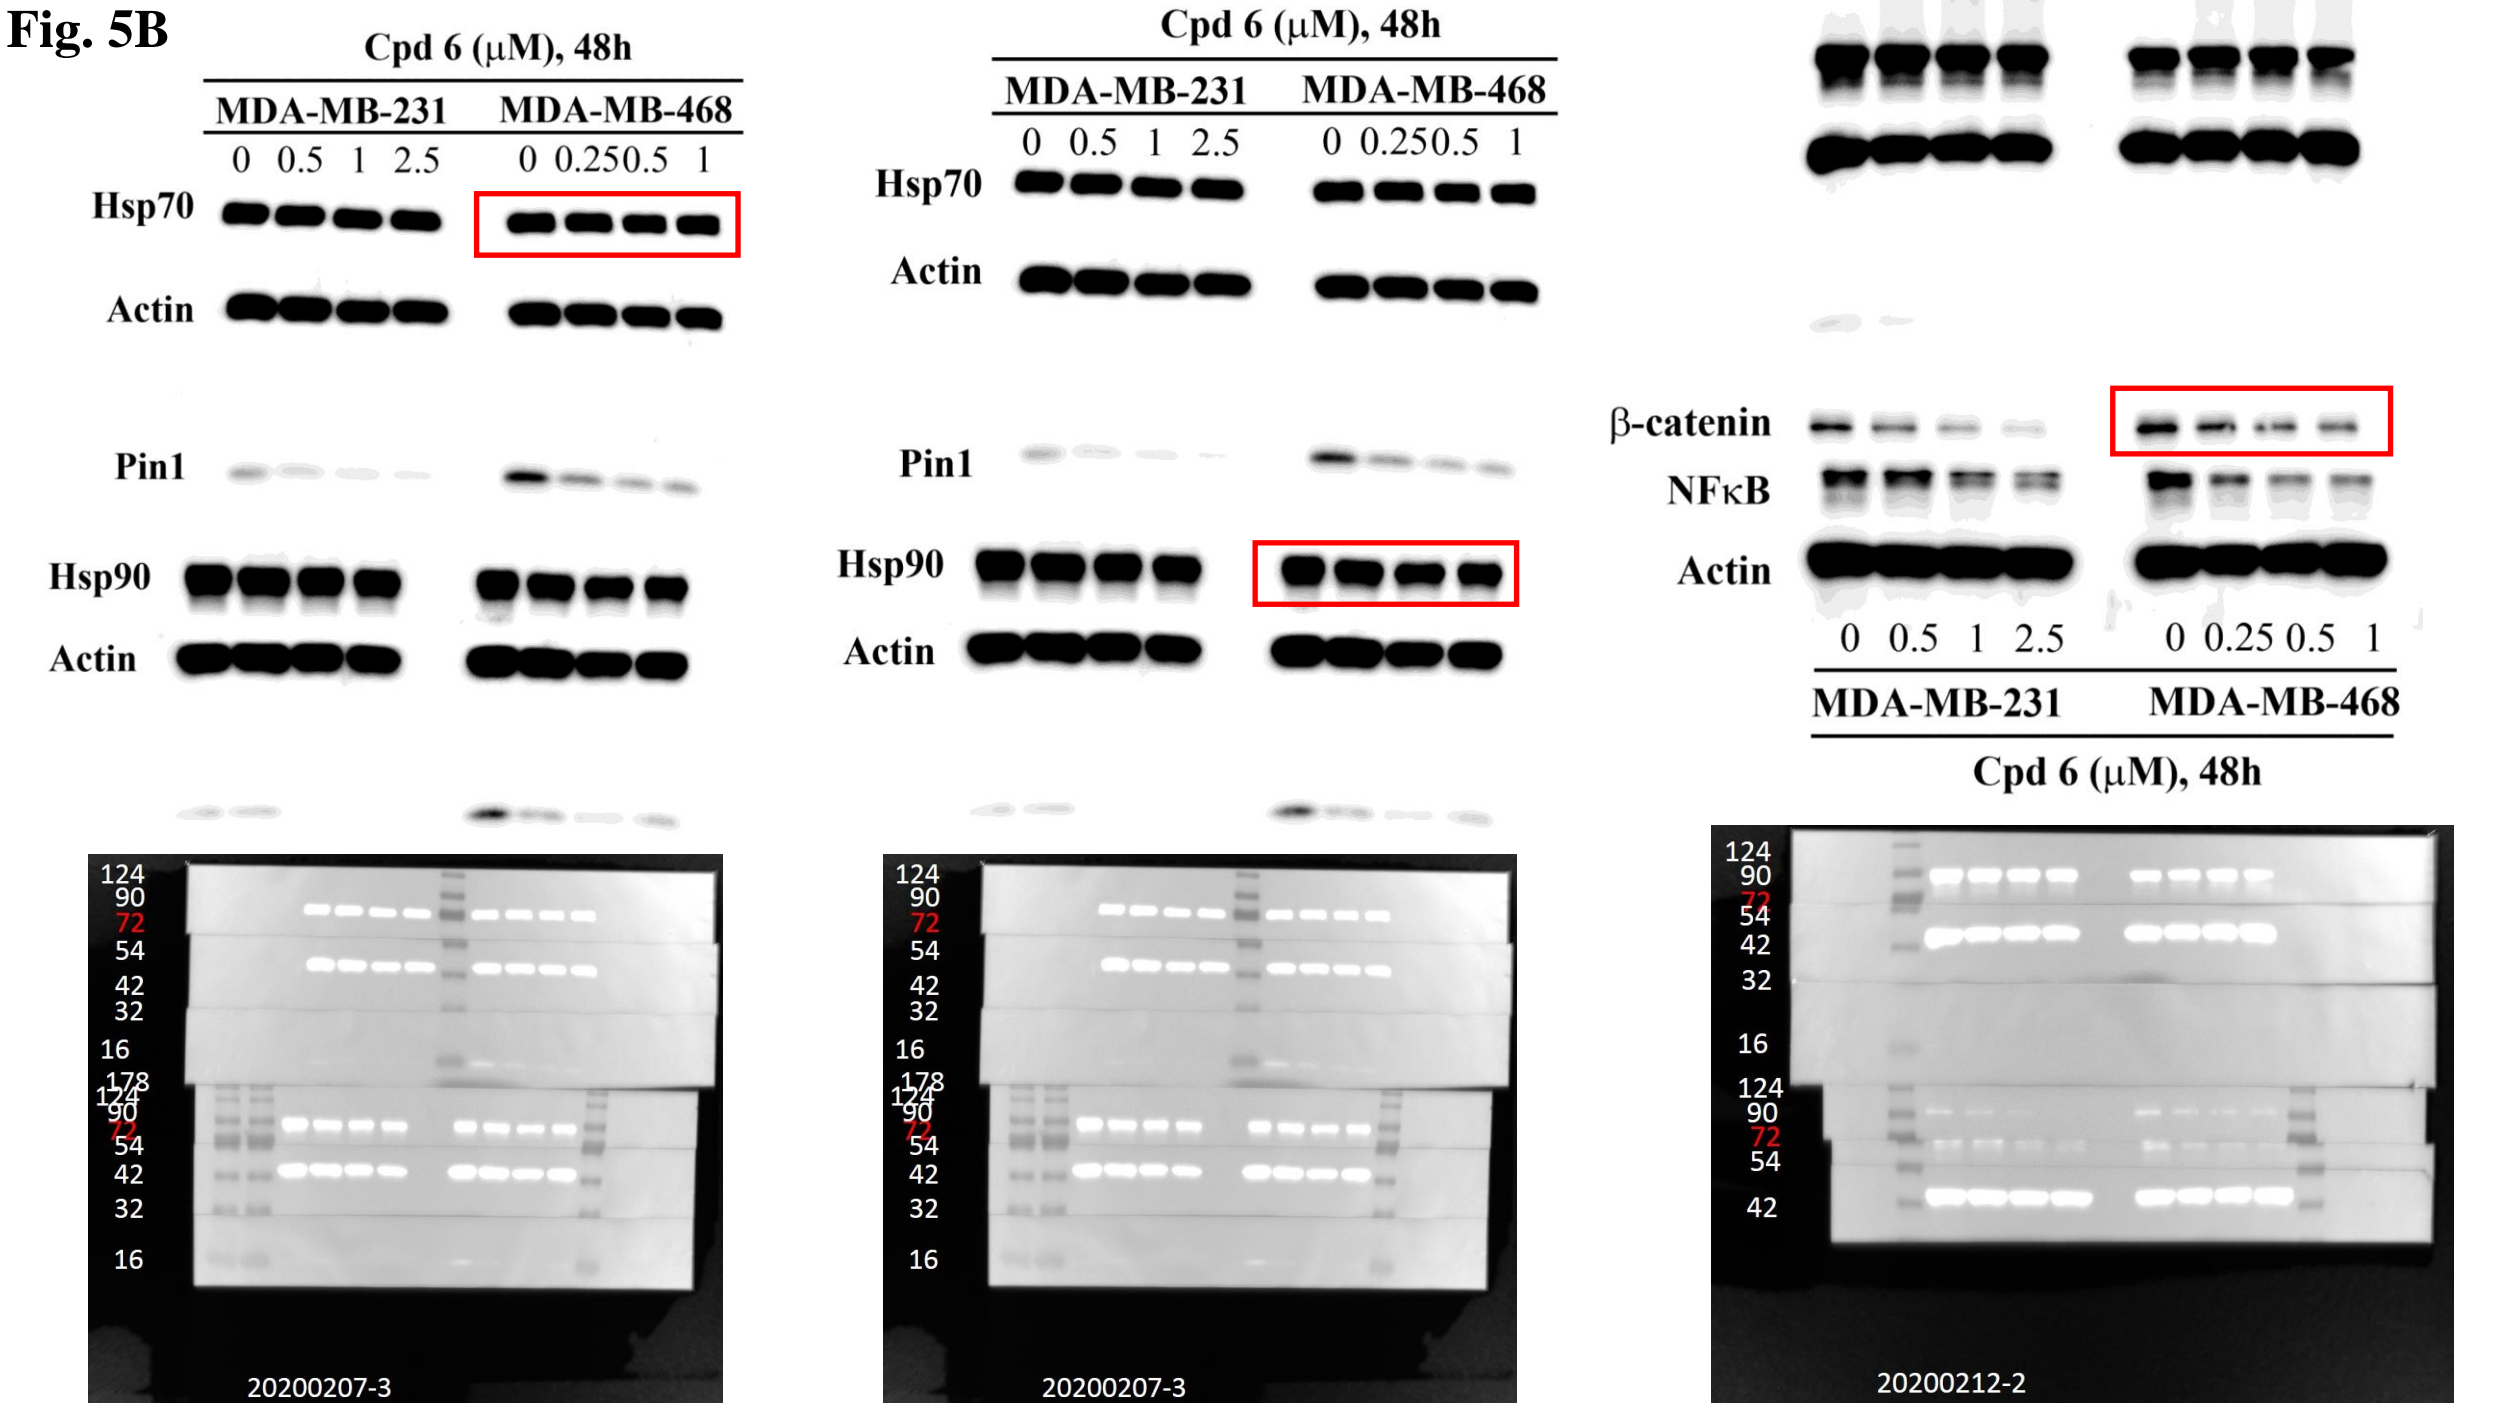

**Fig. 5B**

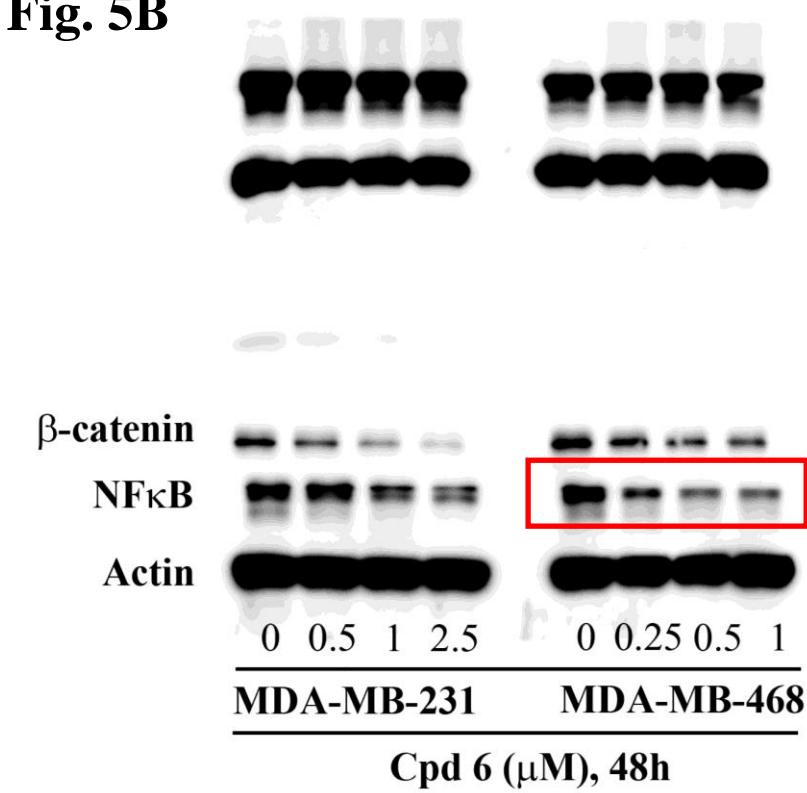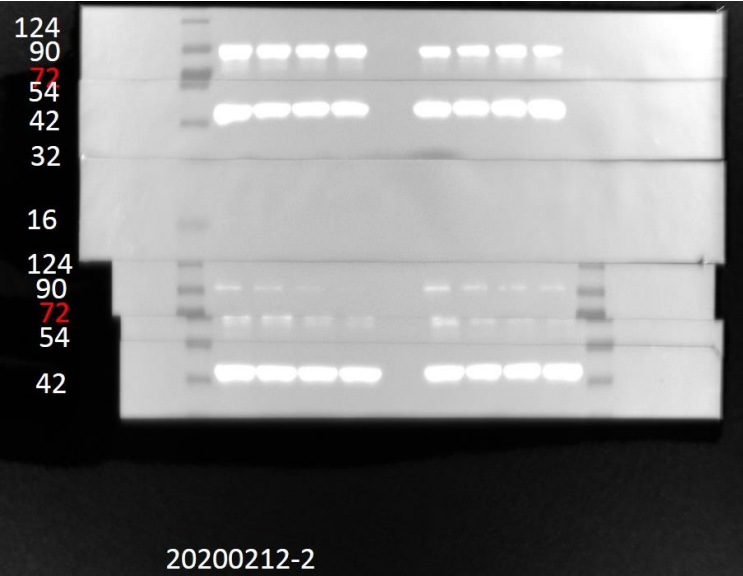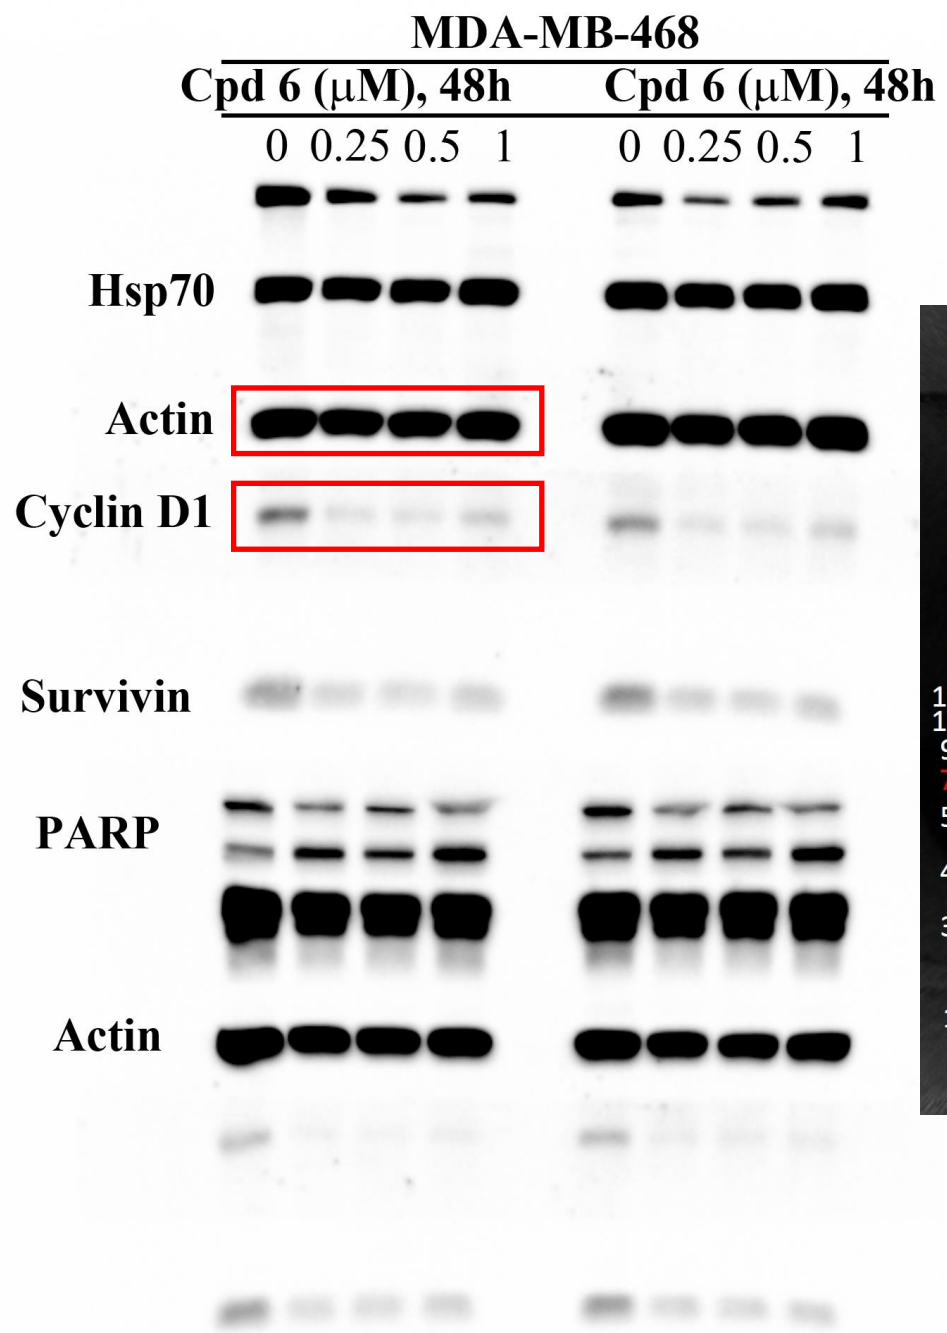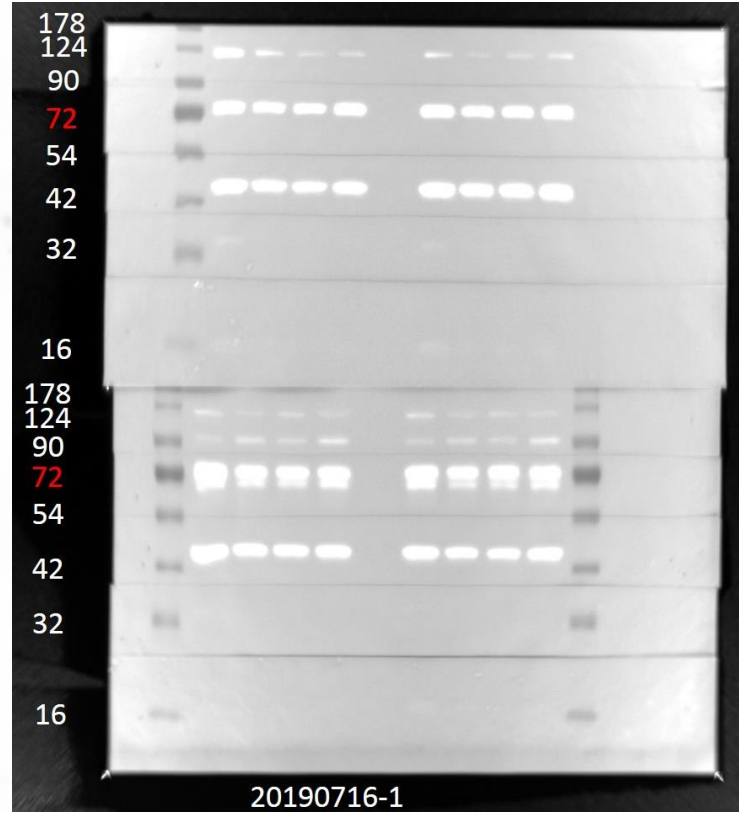



Fig. 5B

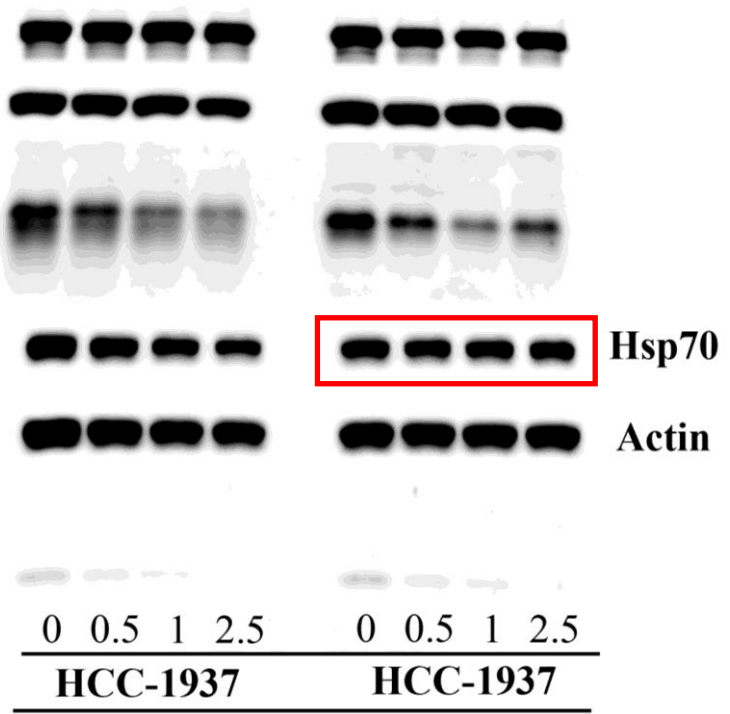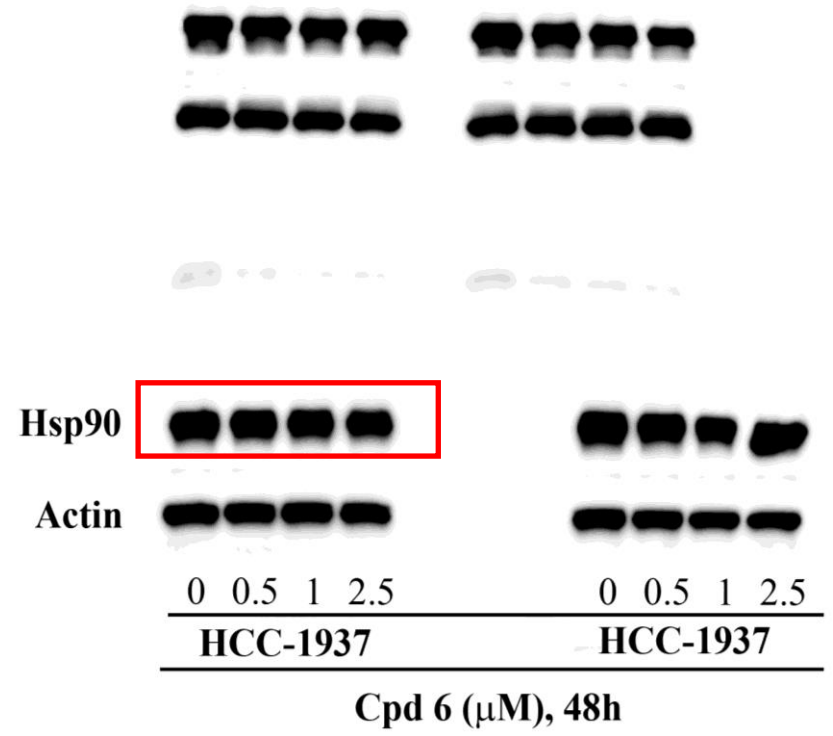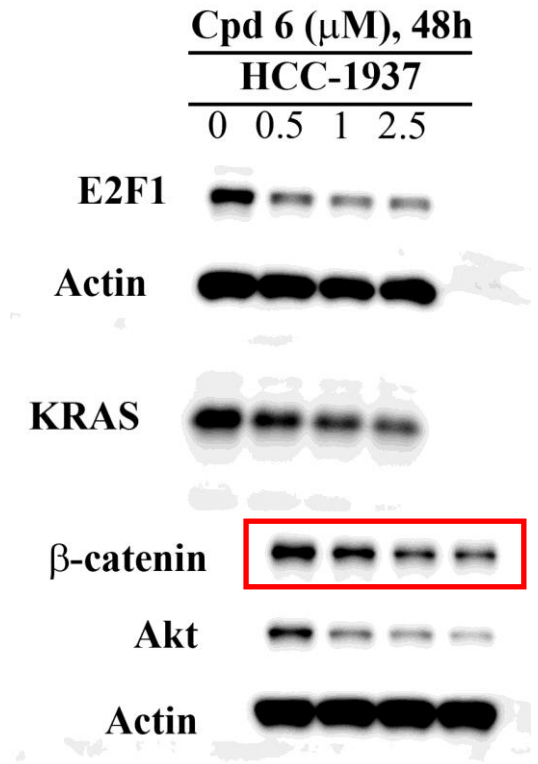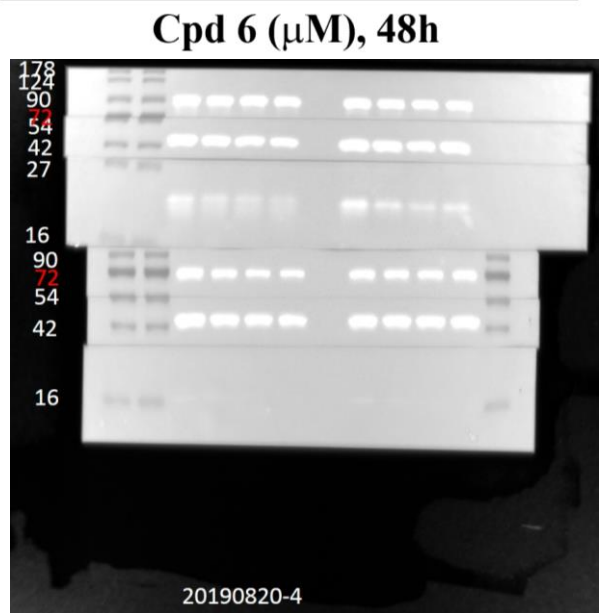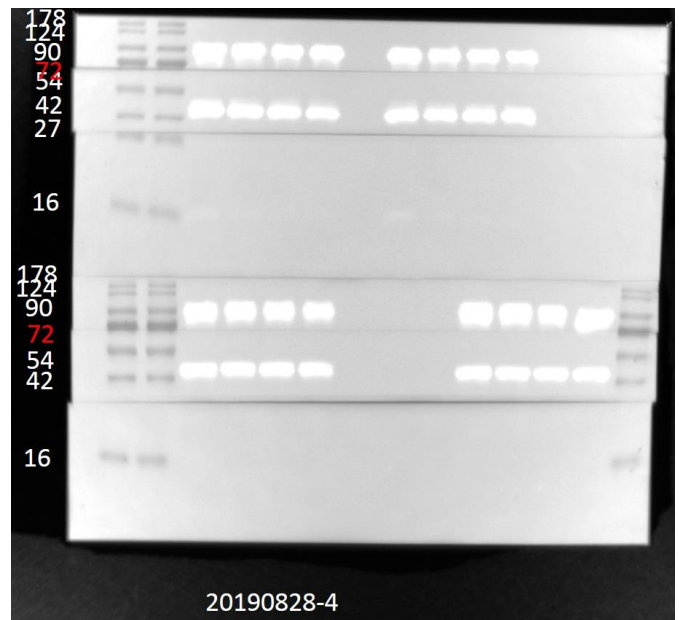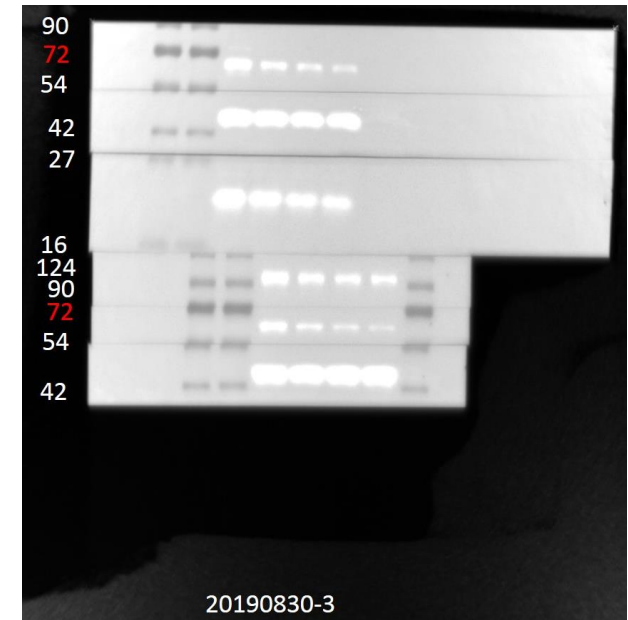



**Fig. 5B**

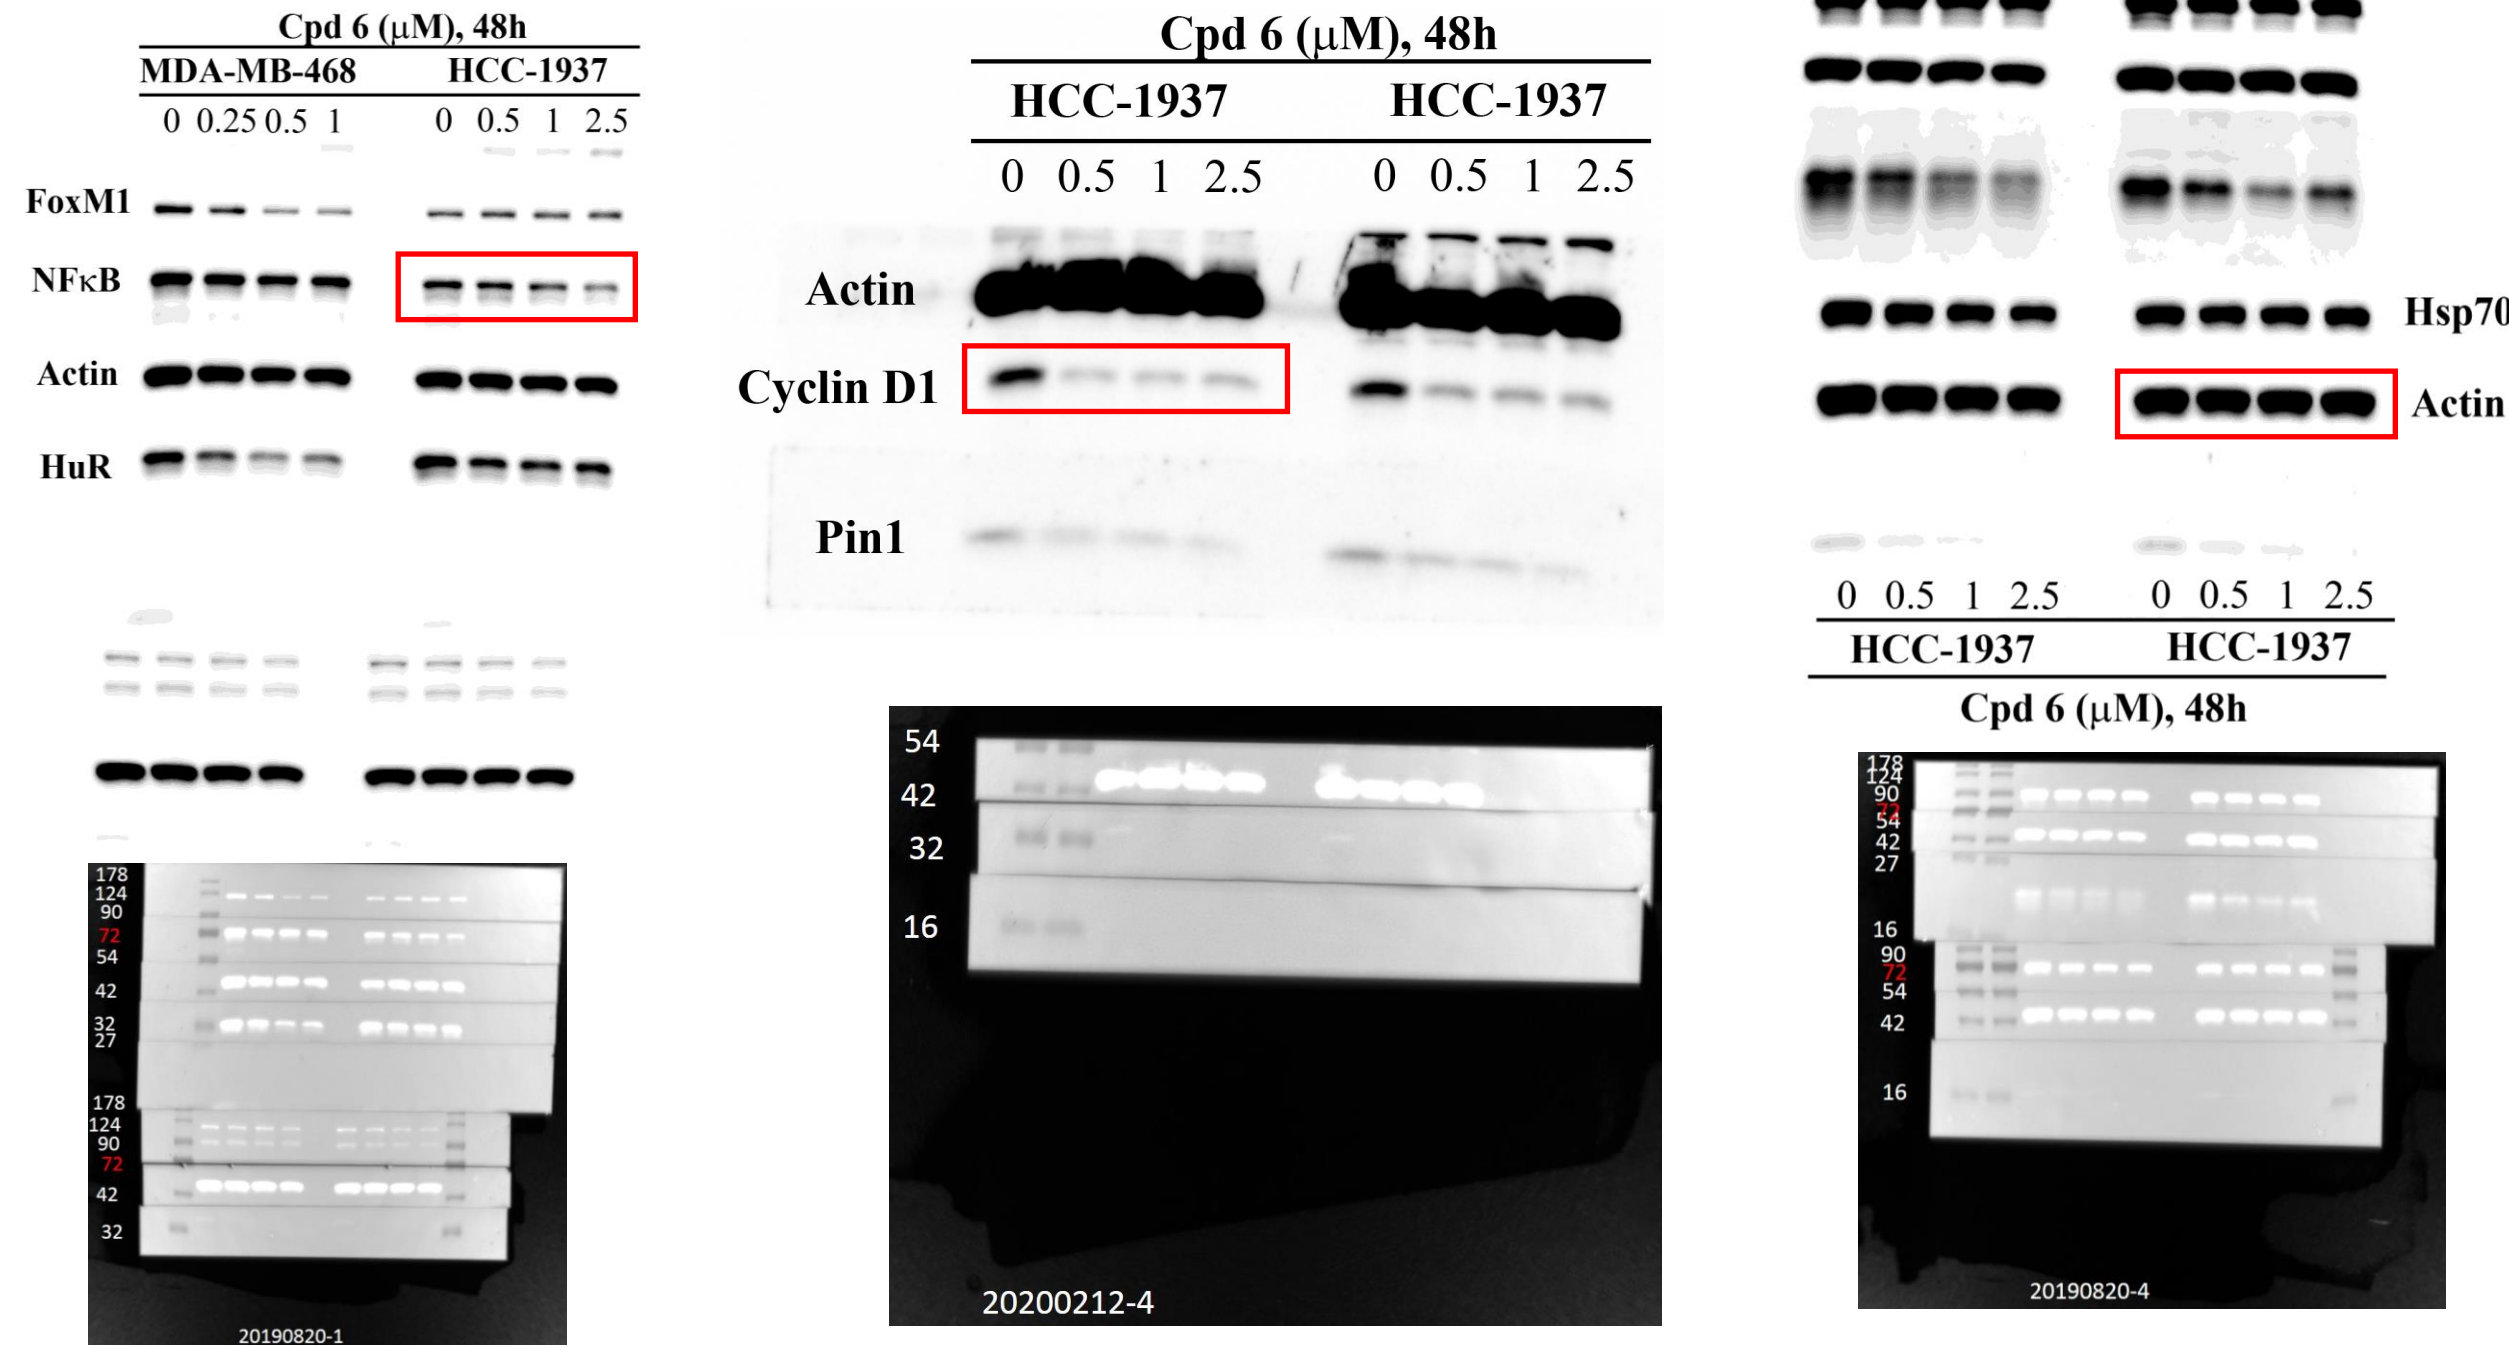

Fig. 5B

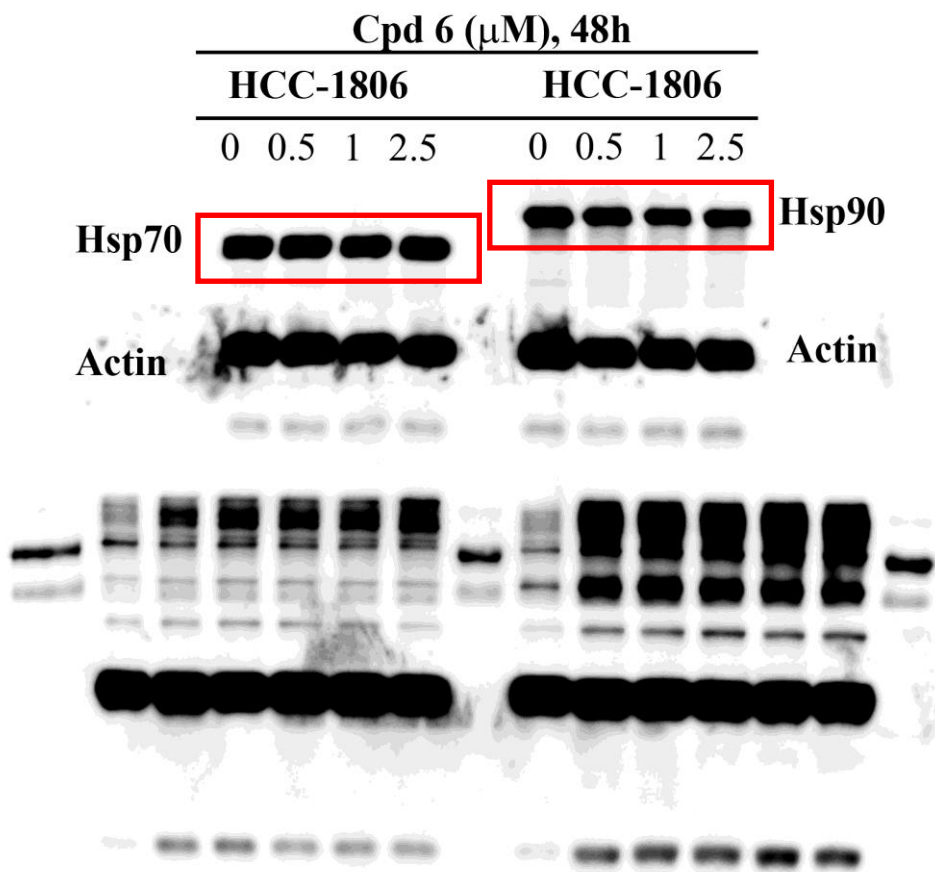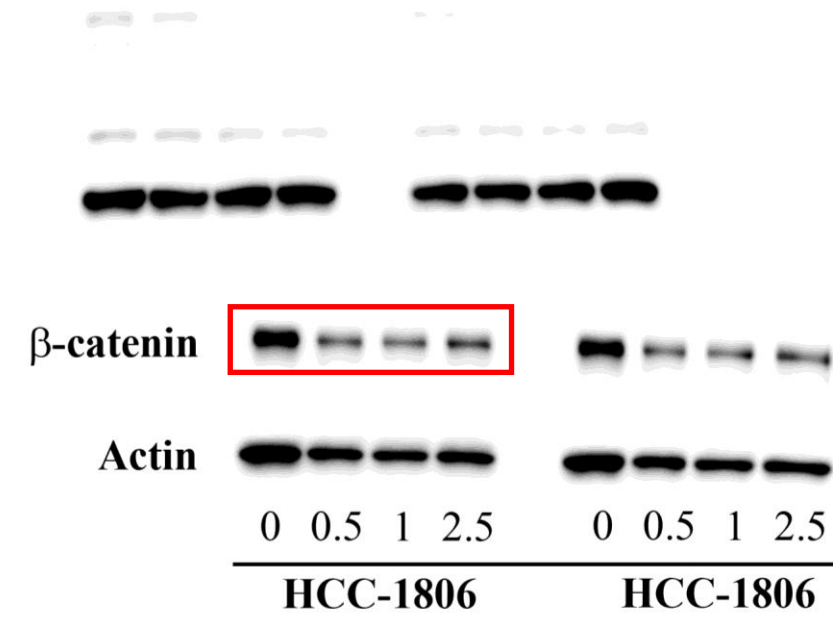

Cpd 6 ( $\mu$ M), 48h

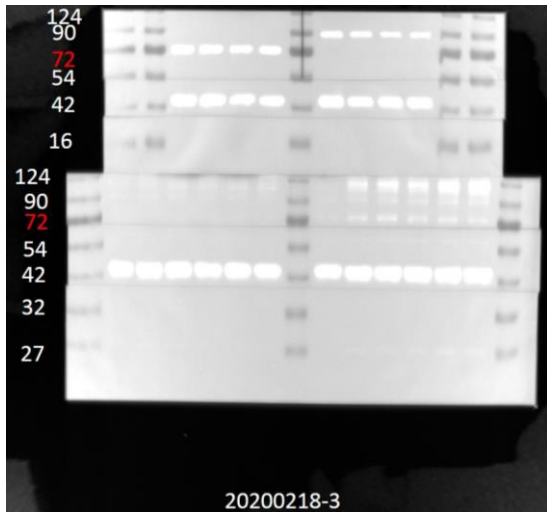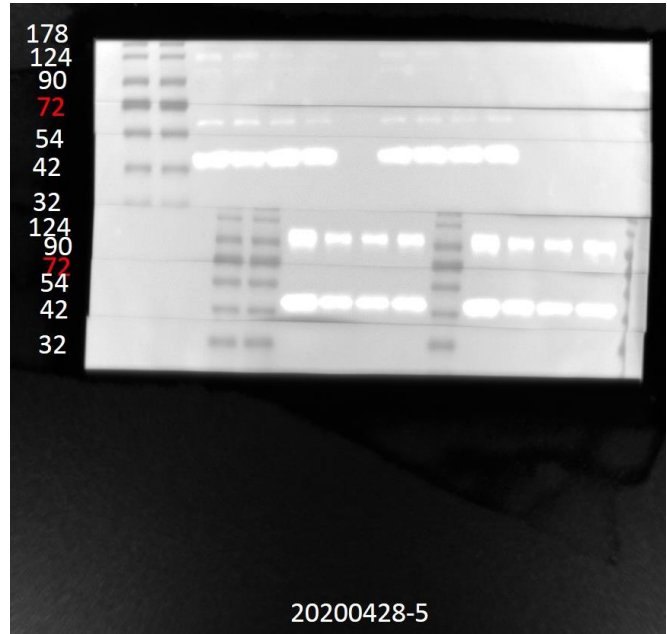

Fig. 5B

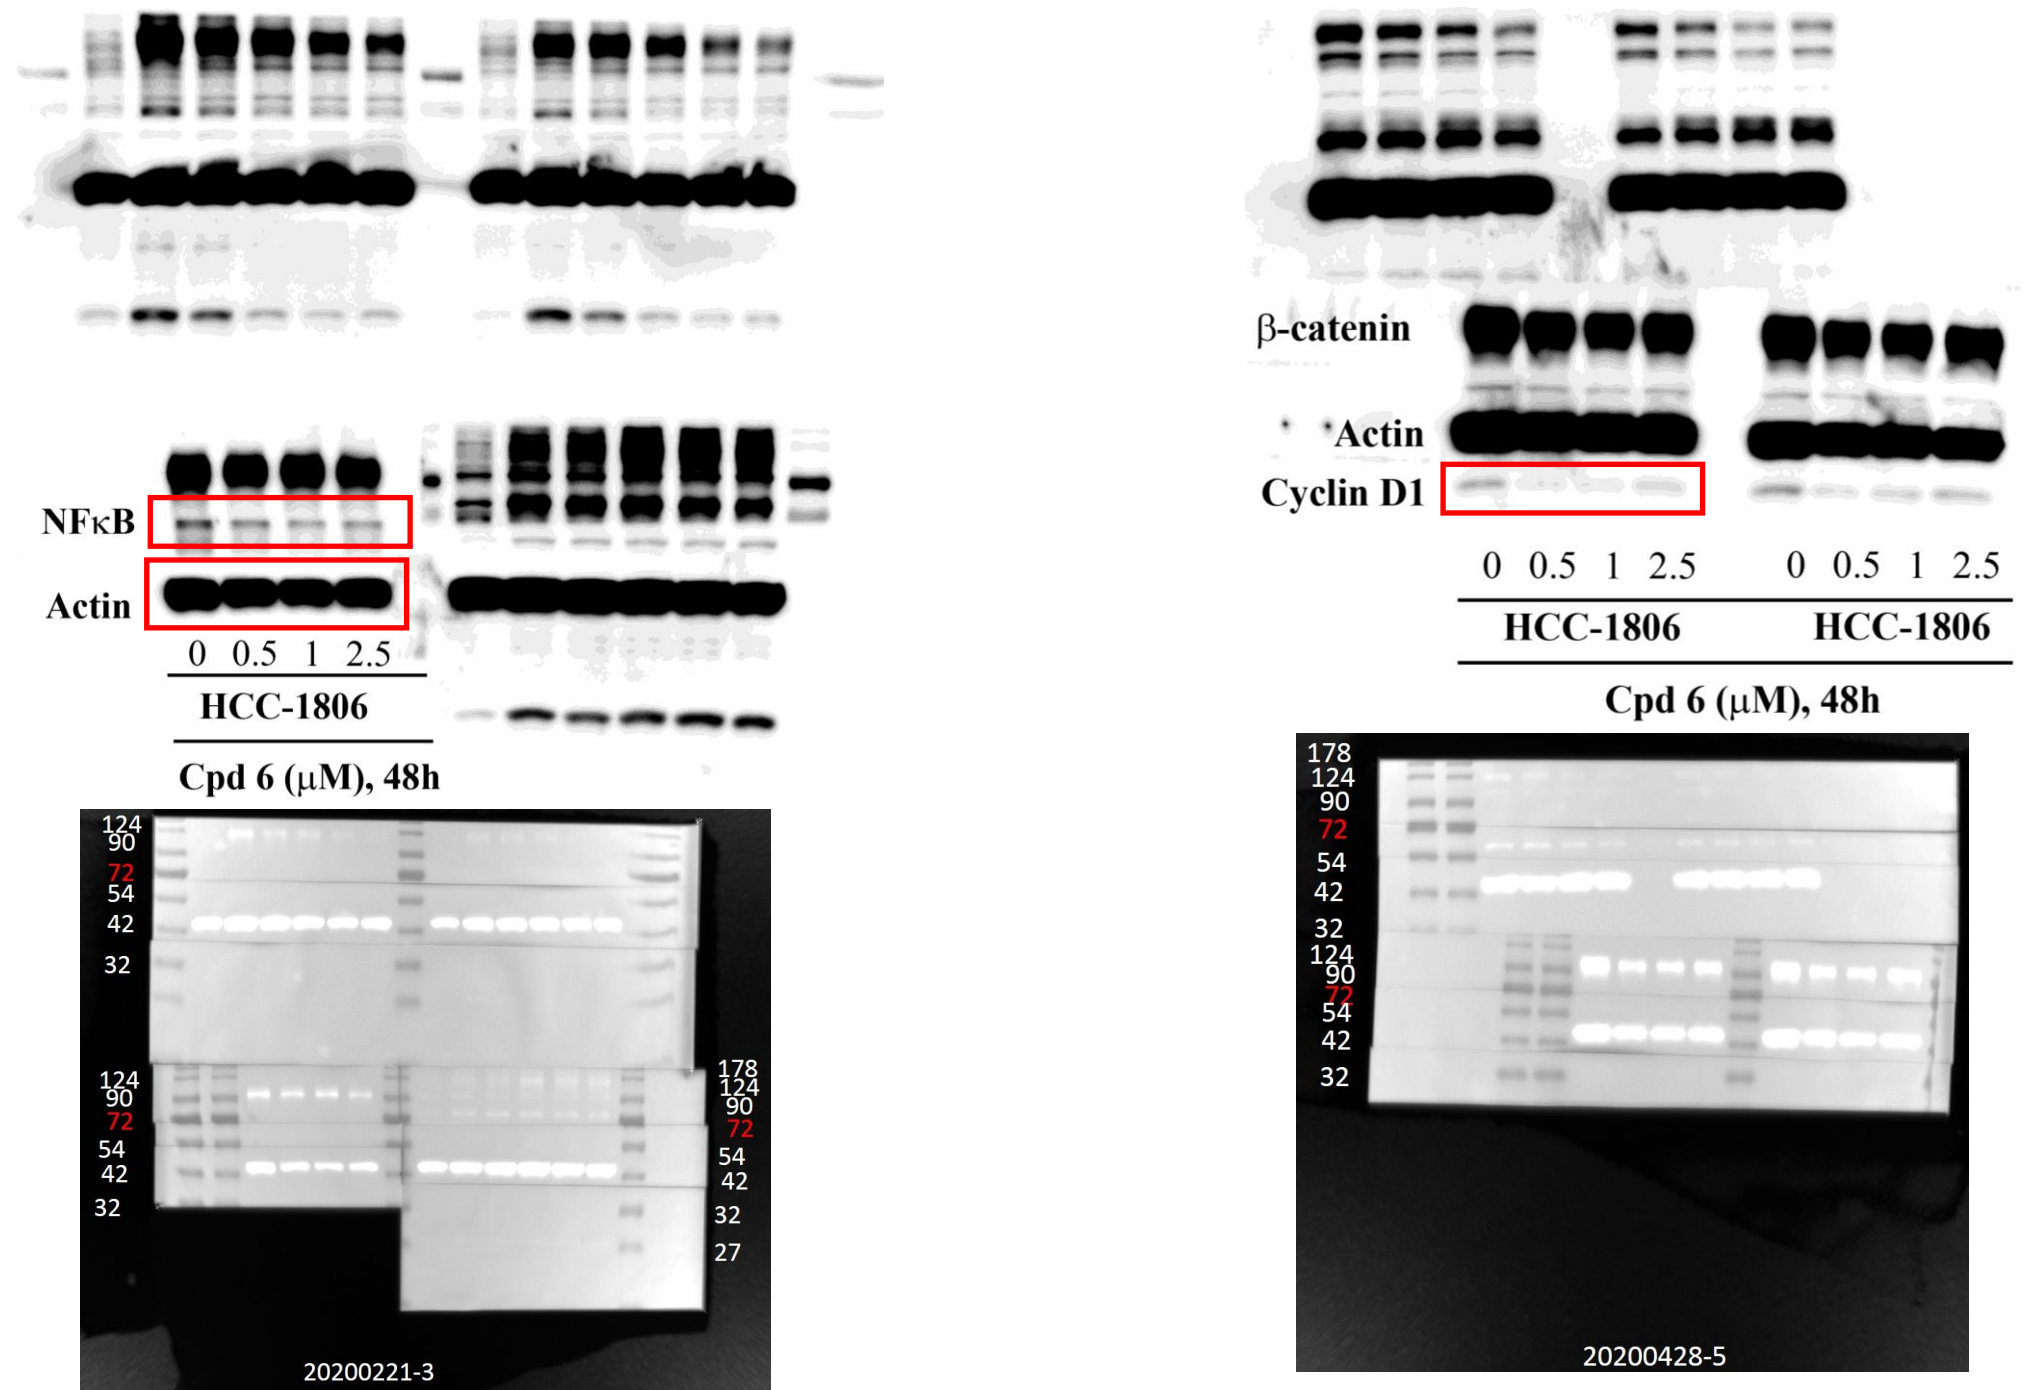

**Fig. 5C (upper)**

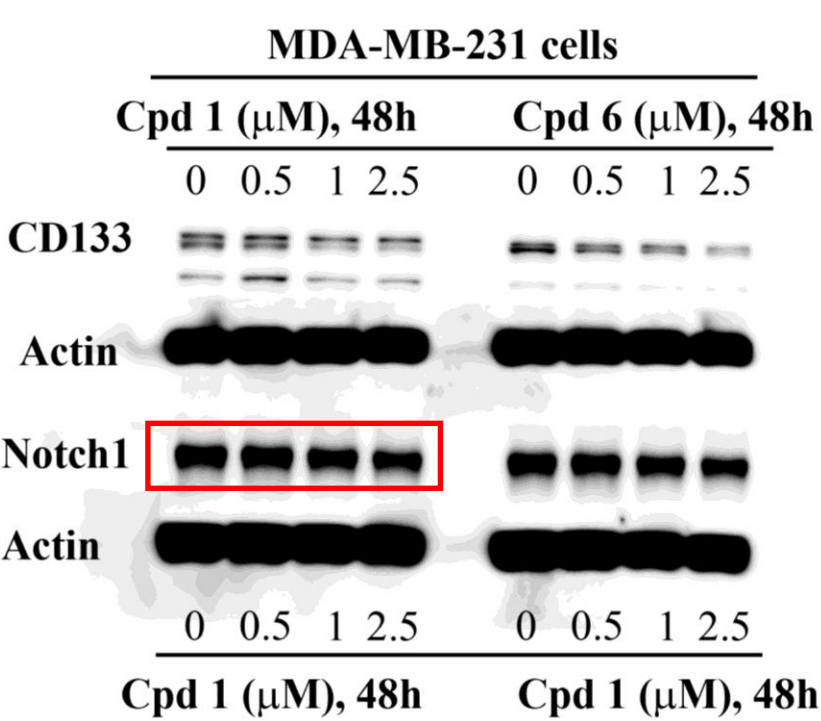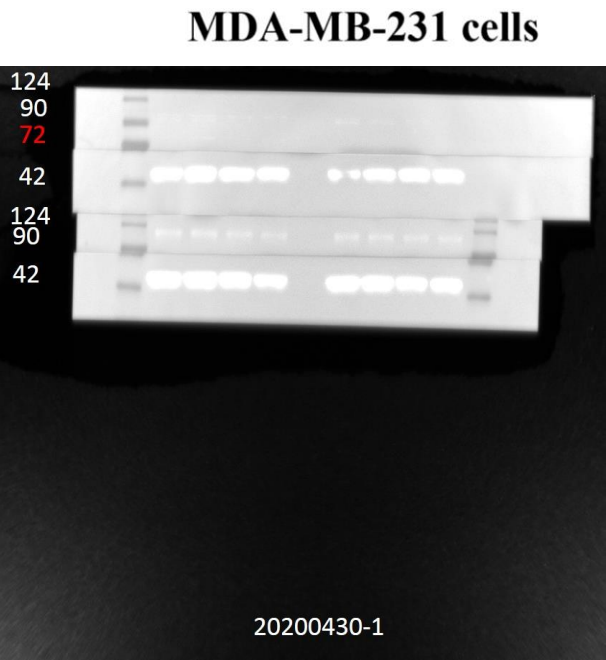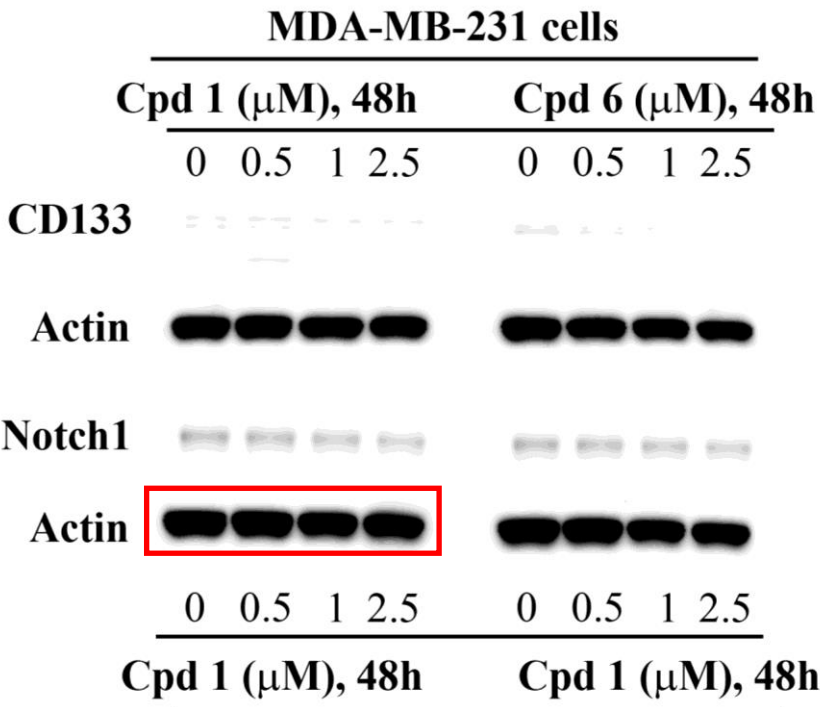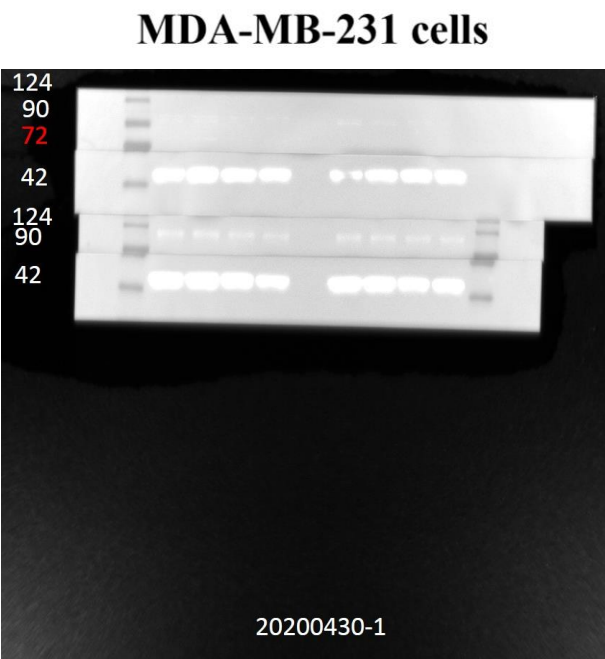



**Fig. 5C (upper)**

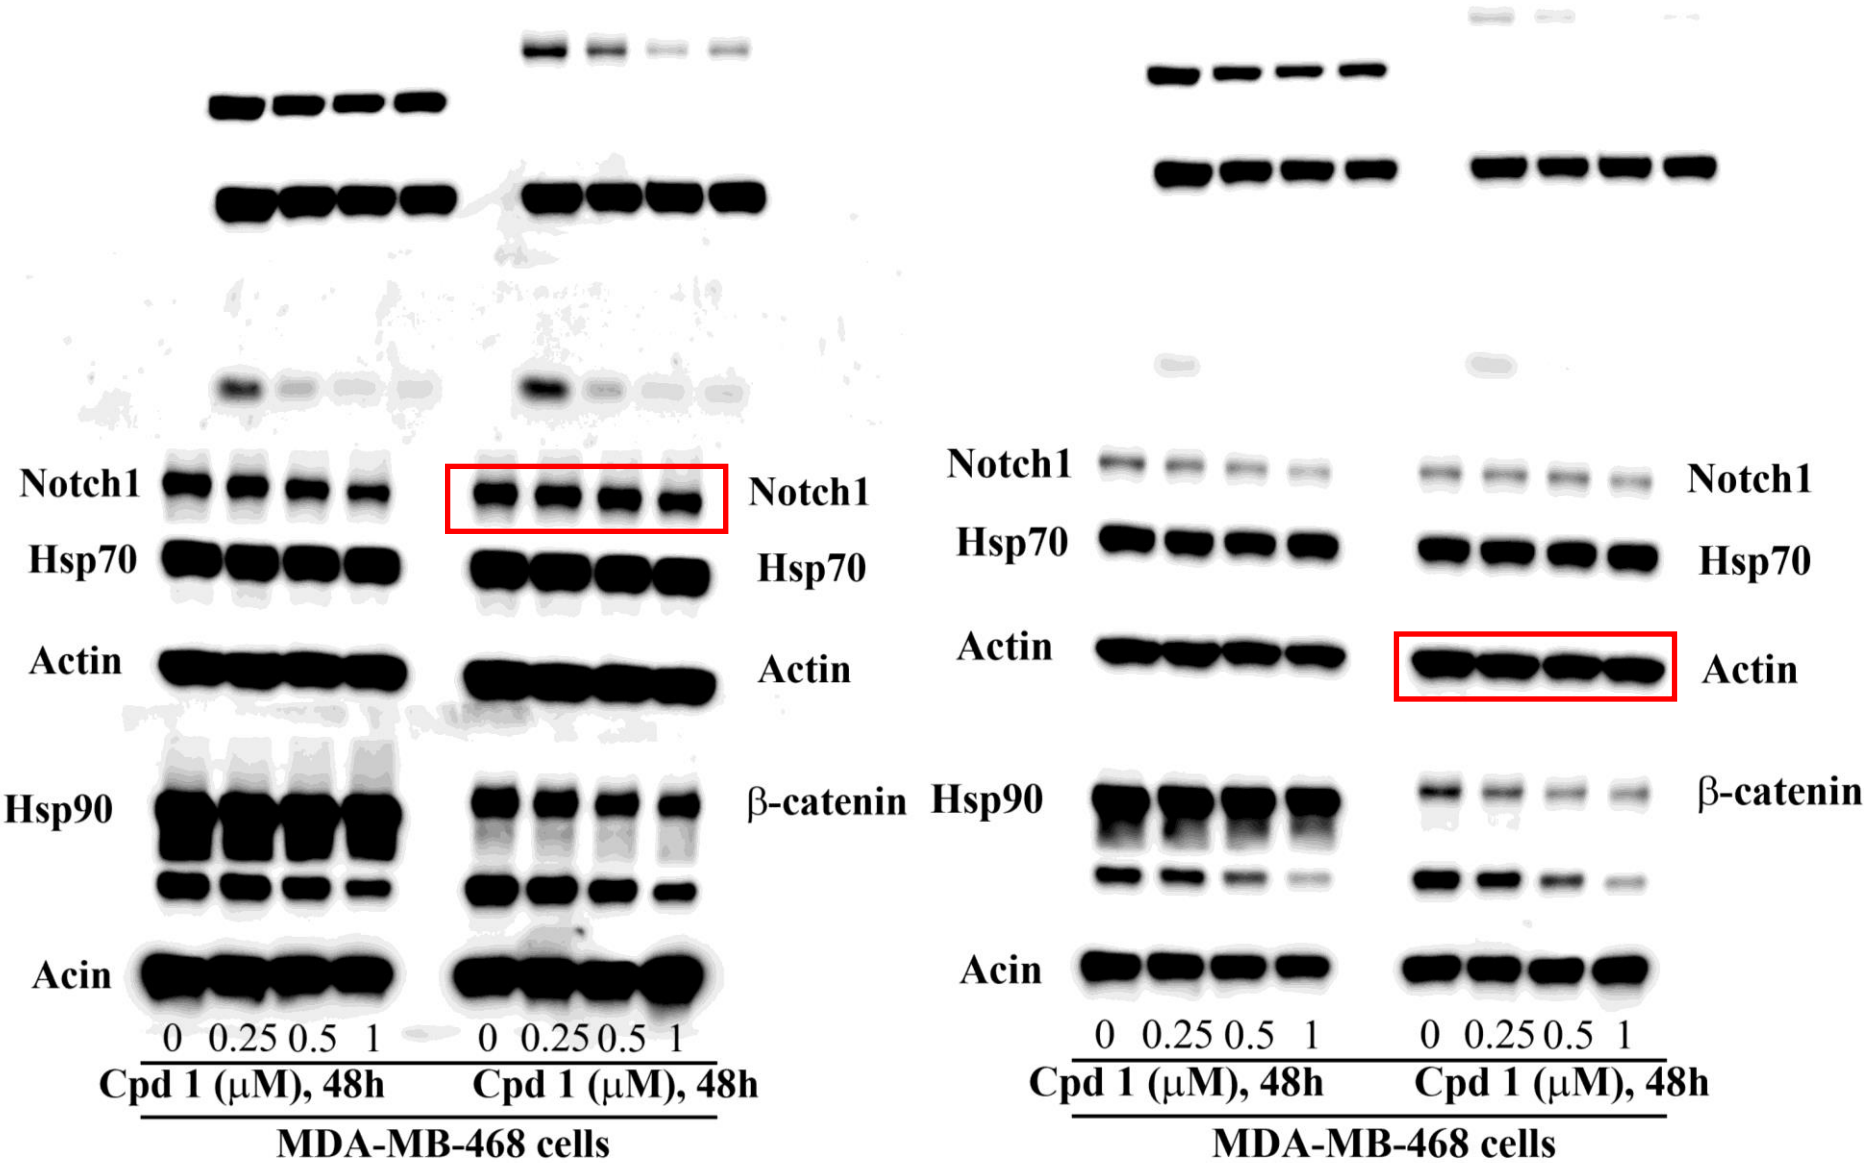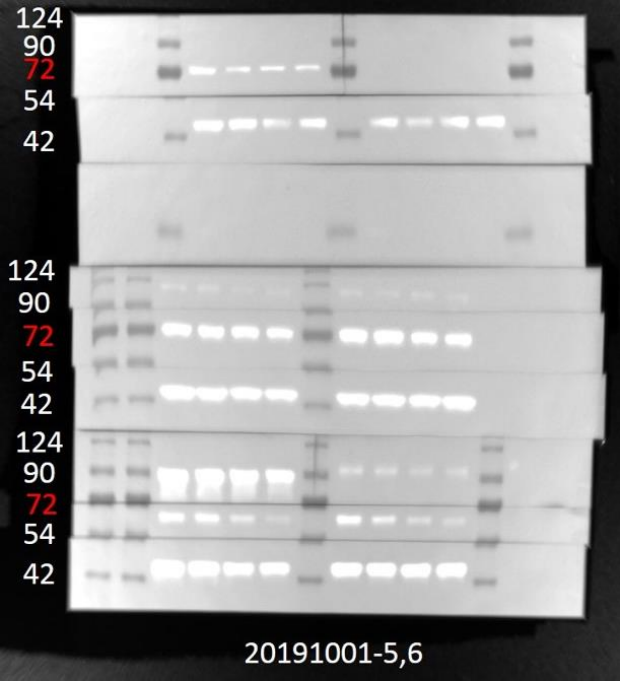

Fig. 5C (lower)

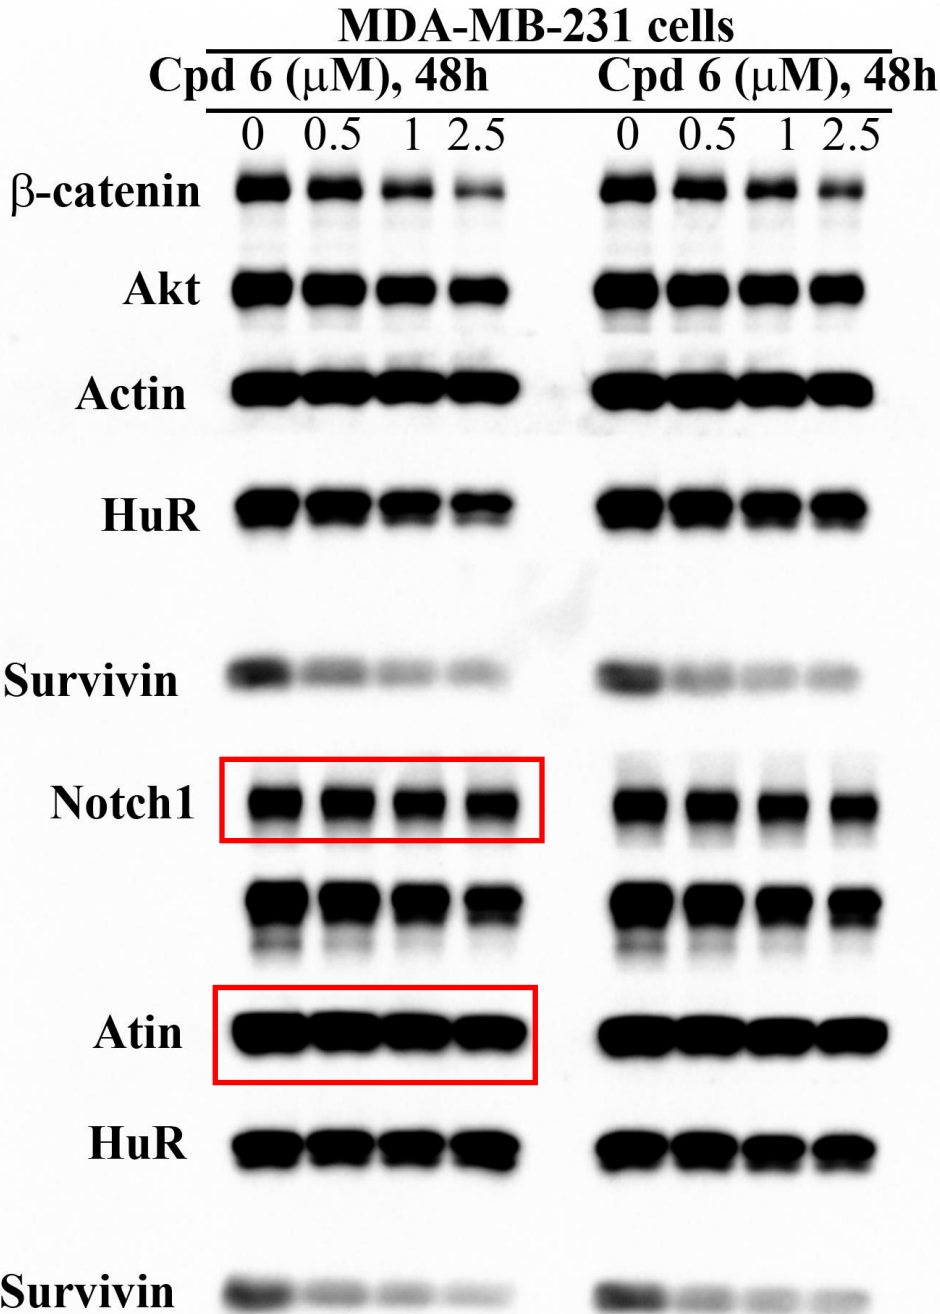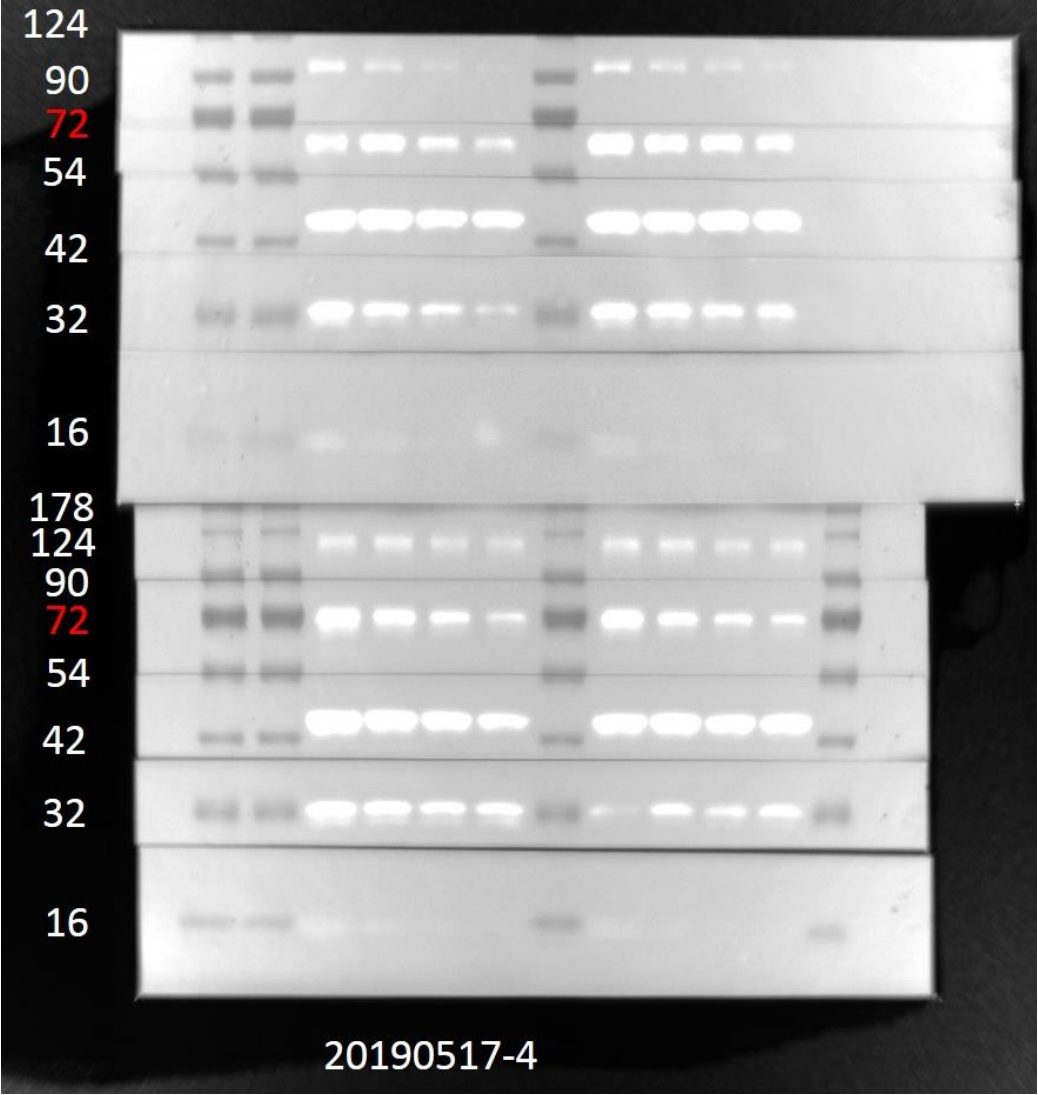

Fig. 5C (lower)

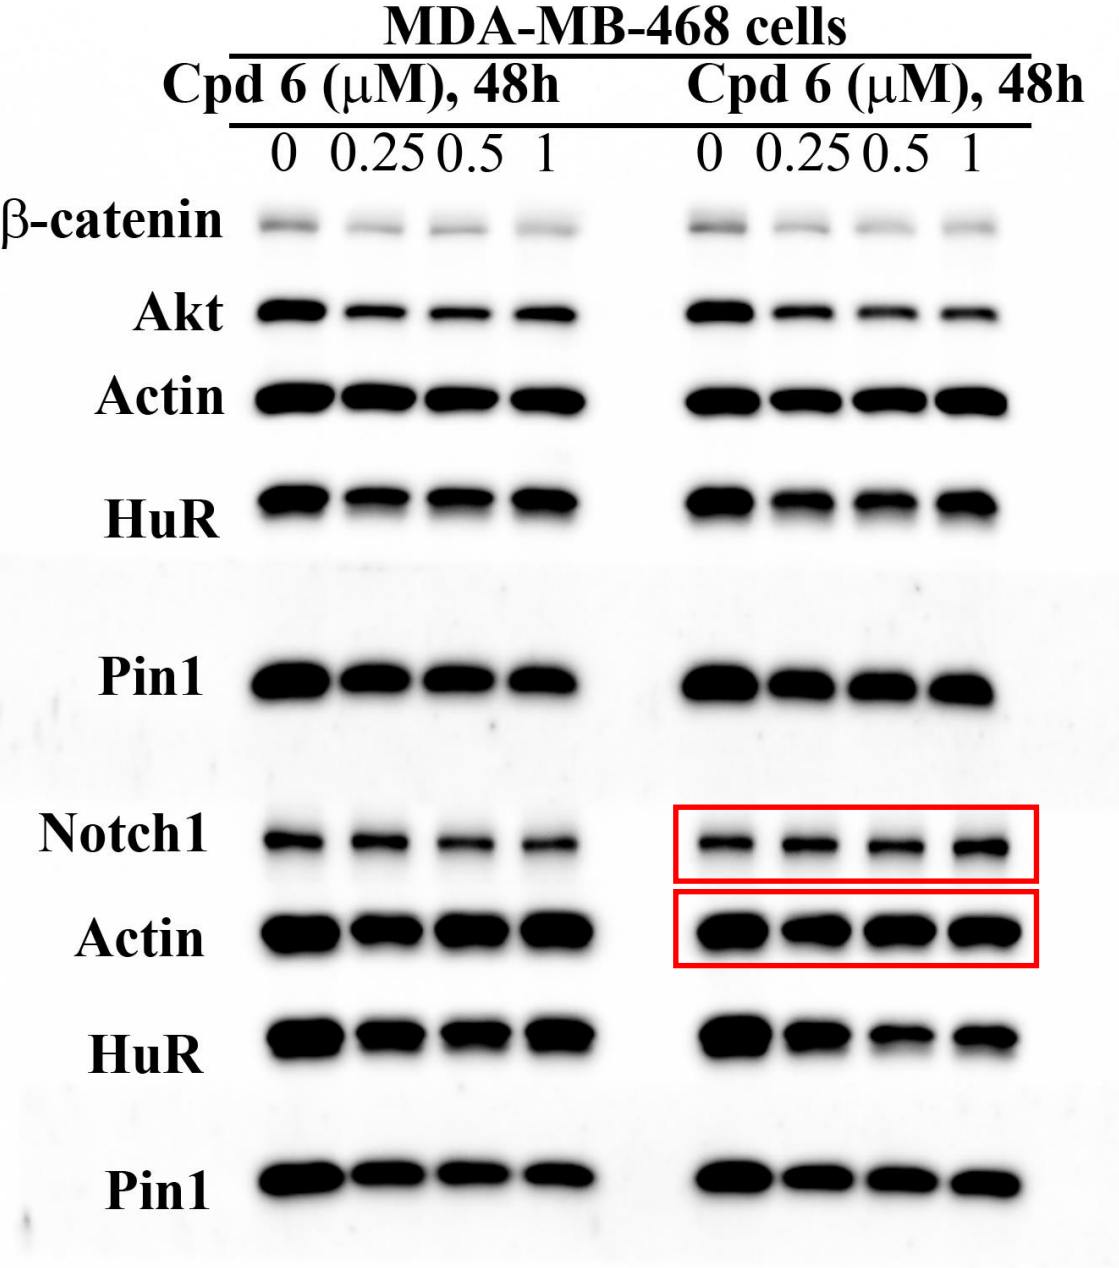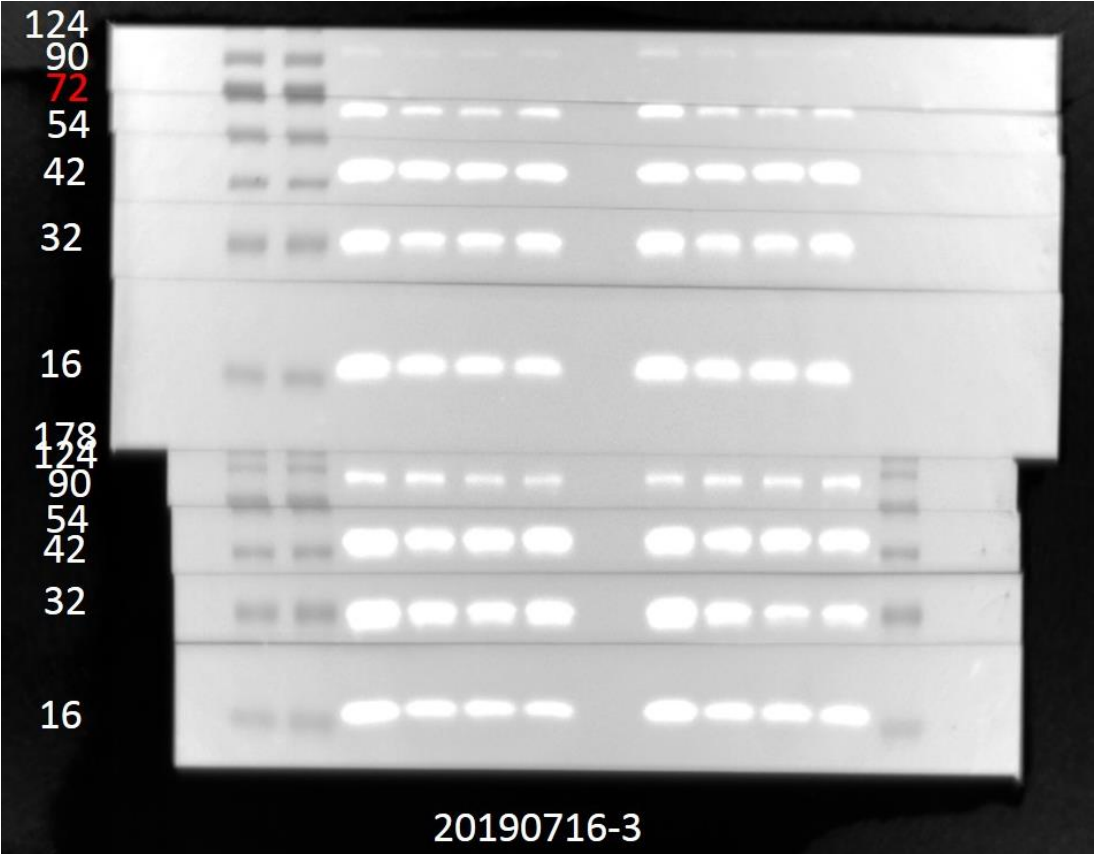

**Fig. 5D**

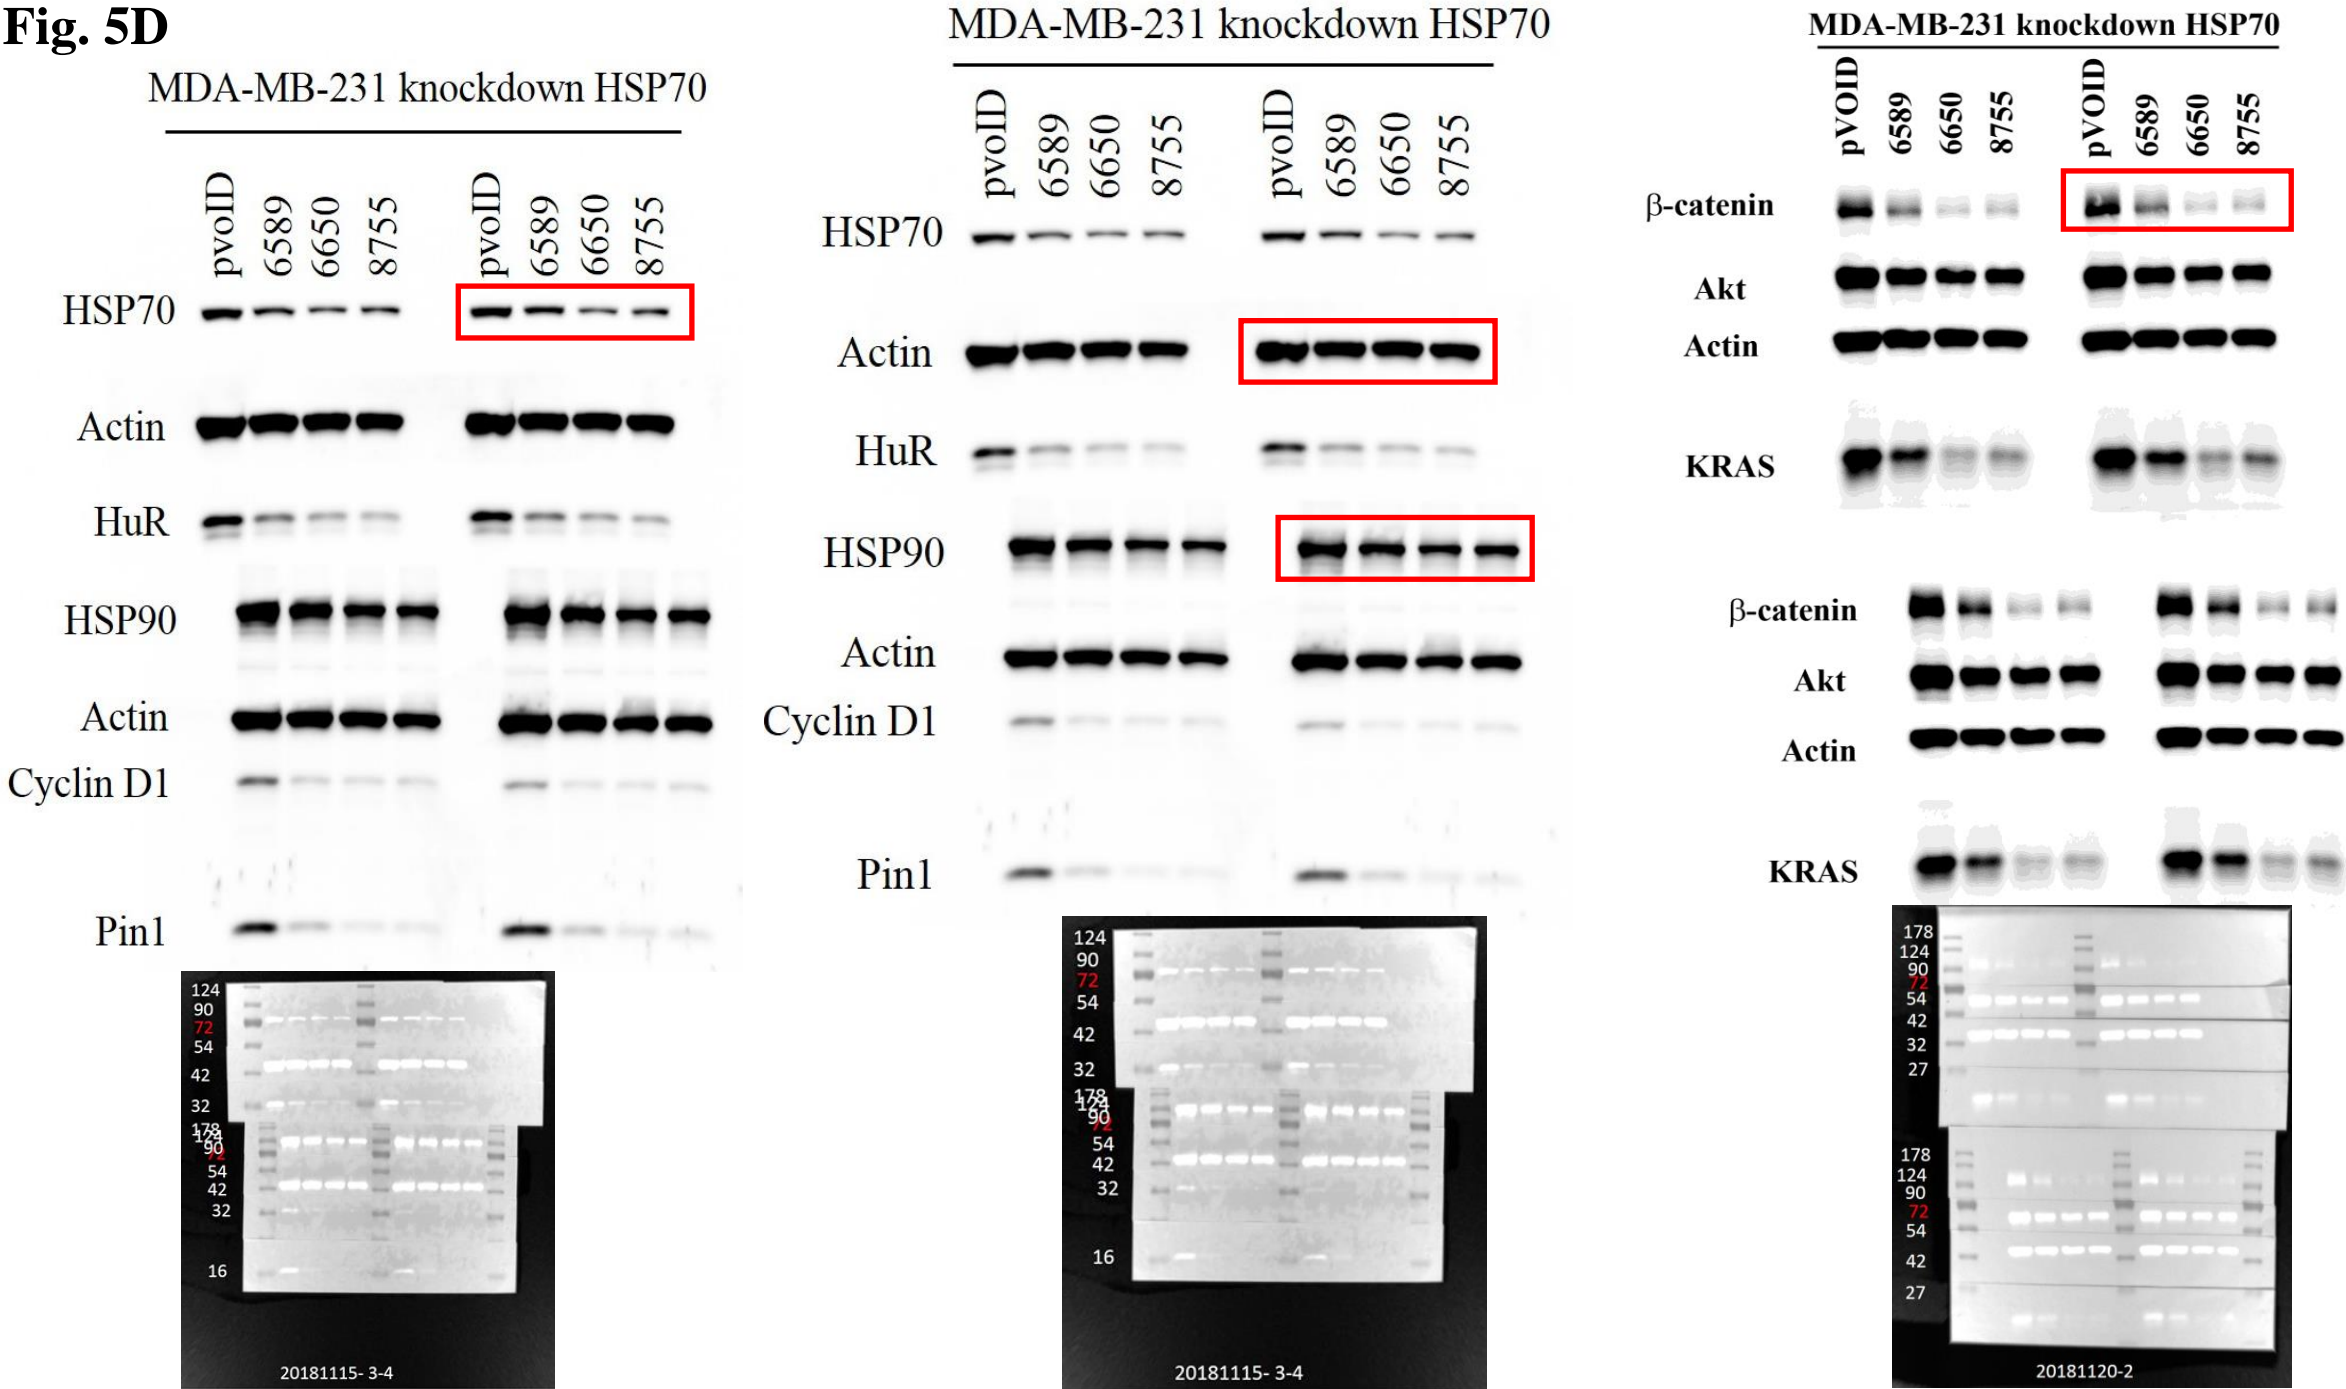



**Fig. 5D** MDA-MB-231 knockdown HSP70

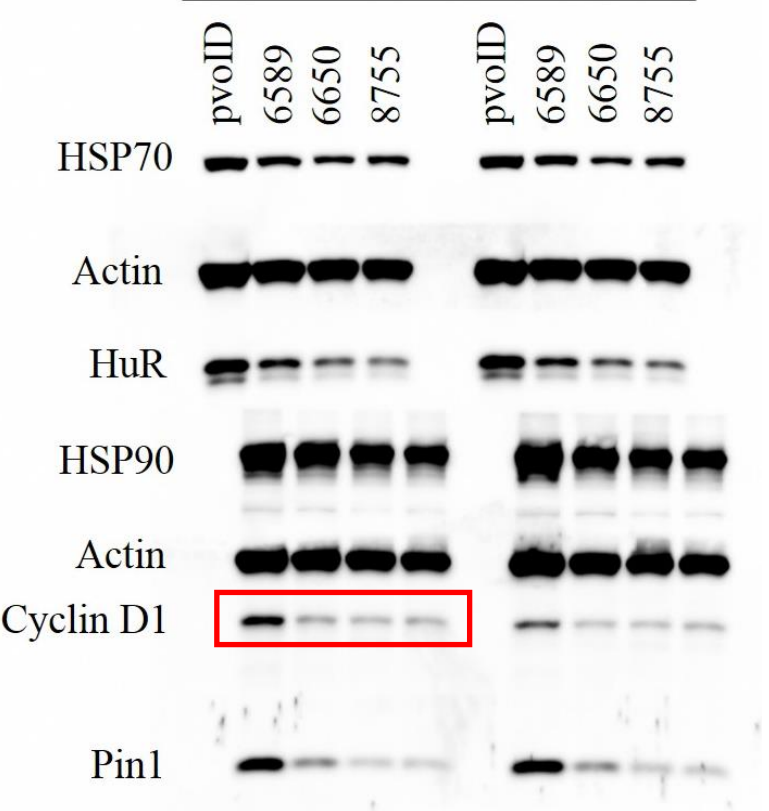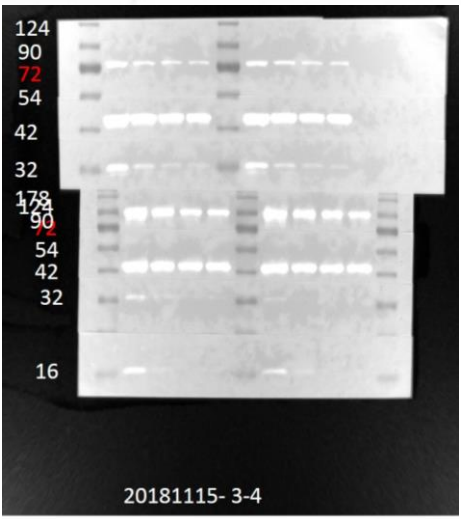

MDA-MB-231 knockdown HSP70

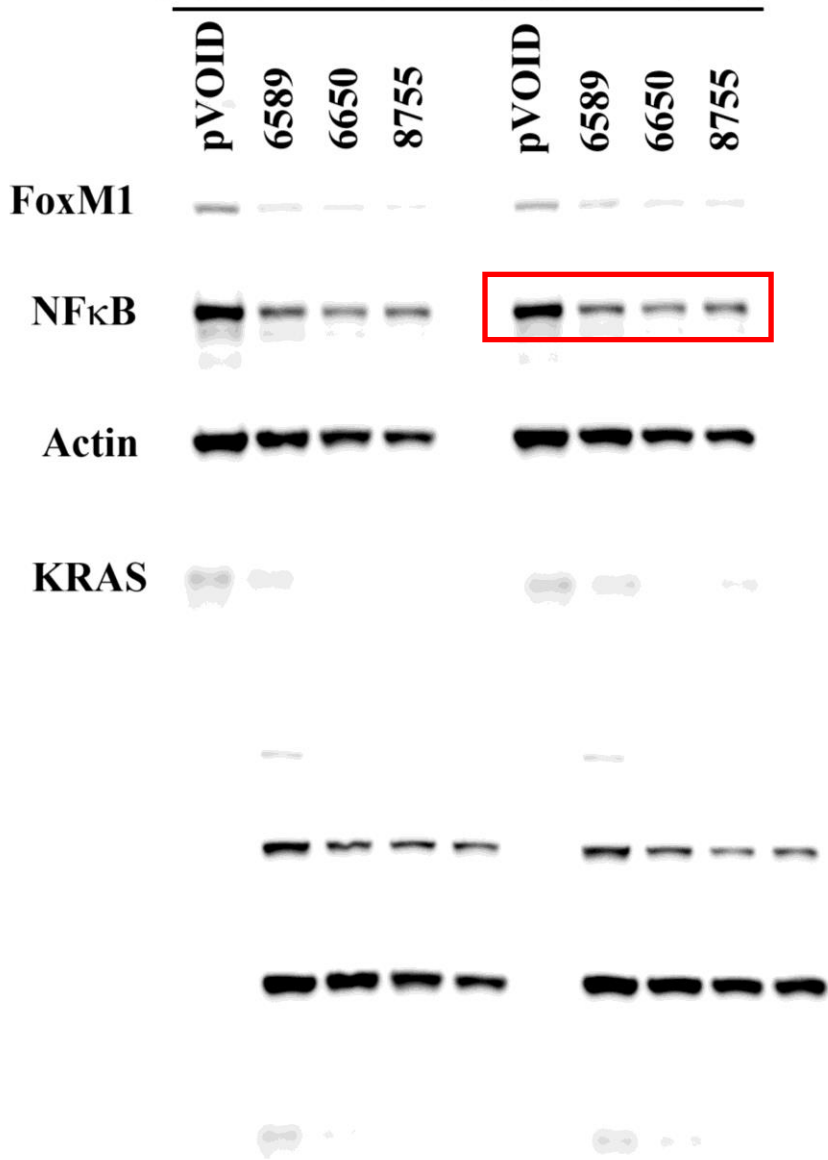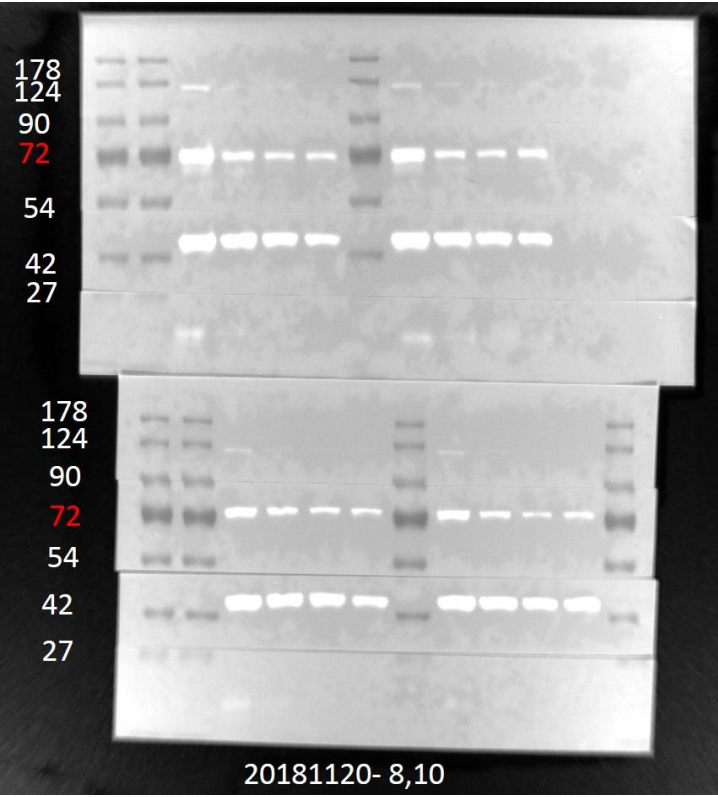

**Fig. 6A**

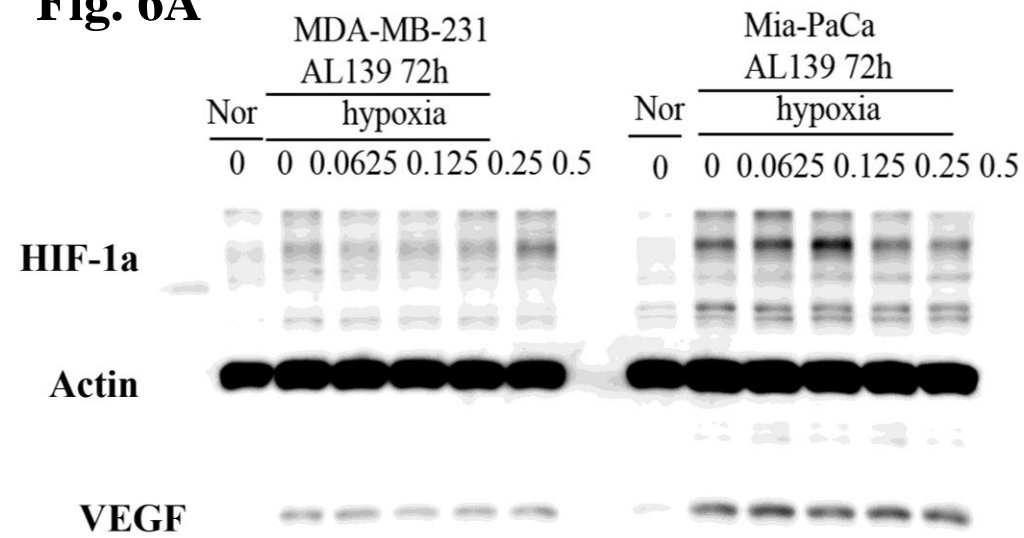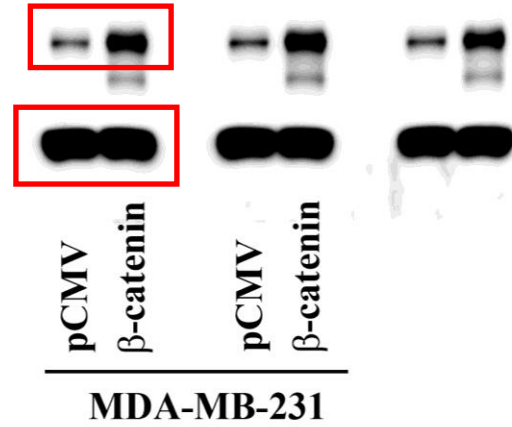

**Fig. 6B**

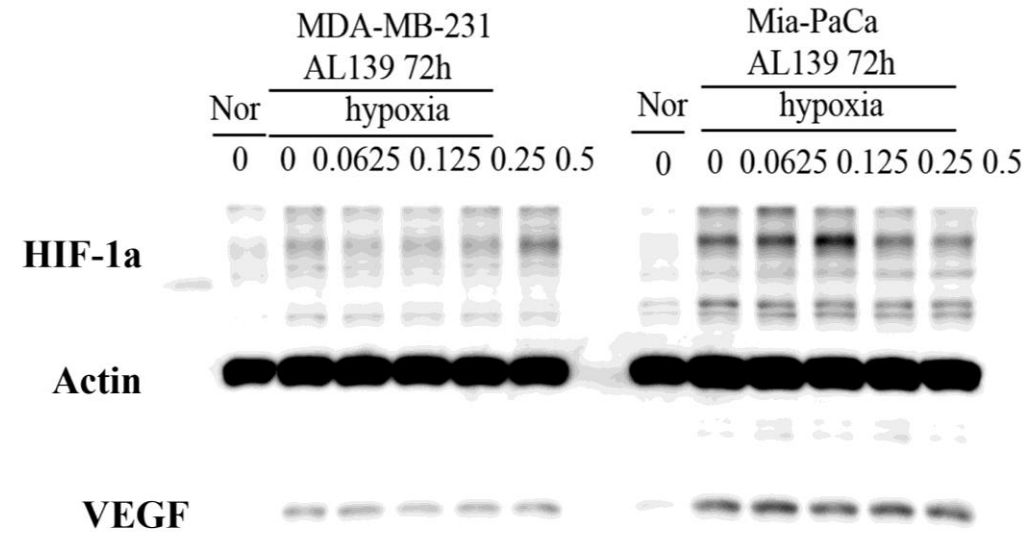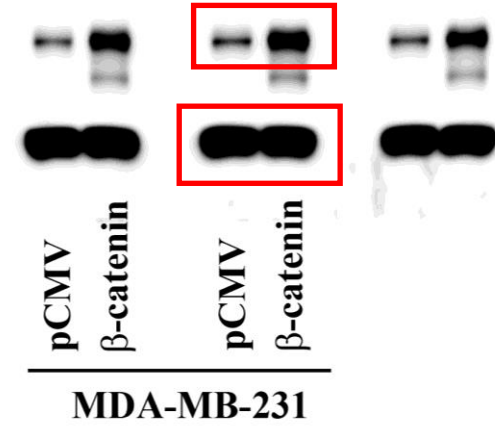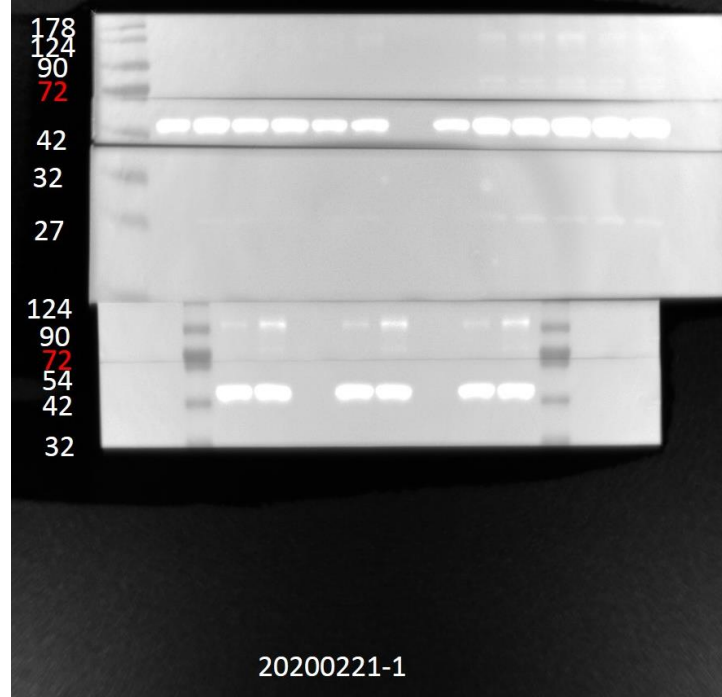

Supplement: s1 [file s1]
